# Supplementary material for: Enantioselective syntheses and application of 4-epi-galiellalactone and the corresponding activity-based probe: from strained bicycles to strained tricycles
Source: Royal Society of Chemistry journal article supplement (doi:10.1039/c8ob01915k), 2018-08-29
Supplement: c8ob01915k1.xlsx [file c8ob01915k1.xlsx]

## Sheet: Sheet1
Table S5. Identification of modified proteins by probe 29 in Molt cells.
Accession	Description	# PSMs
		Probe 29	Competition	Pseudo-probe 30
P35908	Keratin, type II cytoskeletal 2 epidermal OS=Homo sapiens GN=KRT2 PE=1 SV=2 - [K22E_HUMAN]	458	142	183
P13645	Keratin, type I cytoskeletal 10 OS=Homo sapiens GN=KRT10 PE=1 SV=6 - [K1C10_HUMAN]	403	294	227
P04264	Keratin, type II cytoskeletal 1 OS=Homo sapiens GN=KRT1 PE=1 SV=6 - [K2C1_HUMAN]	333	274	233
P07437	Tubulin beta chain OS=Homo sapiens GN=TUBB PE=1 SV=2 - [TBB5_HUMAN]	287	137
P13796	Plastin-2 OS=Homo sapiens GN=LCP1 PE=1 SV=6 - [PLSL_HUMAN]	266	124	13
P60709	Actin, cytoplasmic 1 OS=Homo sapiens GN=ACTB PE=1 SV=1 - [ACTB_HUMAN]	242	130	31
P68363	Tubulin alpha-1B chain OS=Homo sapiens GN=TUBA1B PE=1 SV=1 - [TBA1B_HUMAN]	231	117	24
P68371	Tubulin beta-4B chain OS=Homo sapiens GN=TUBB4B PE=1 SV=1 - [TBB4B_HUMAN]	217	110
Q71U36	Tubulin alpha-1A chain OS=Homo sapiens GN=TUBA1A PE=1 SV=1 - [TBA1A_HUMAN]	212	108
Q9BQE3	Tubulin alpha-1C chain OS=Homo sapiens GN=TUBA1C PE=1 SV=1 - [TBA1C_HUMAN]	209	104
Q13885	Tubulin beta-2A chain OS=Homo sapiens GN=TUBB2A PE=1 SV=1 - [TBB2A_HUMAN]	202
P35527	Keratin, type I cytoskeletal 9 OS=Homo sapiens GN=KRT9 PE=1 SV=3 - [K1C9_HUMAN]	200	246	117
P04350	Tubulin beta-4A chain OS=Homo sapiens GN=TUBB4A PE=1 SV=2 - [TBB4A_HUMAN]	175	83
P00558	Phosphoglycerate kinase 1 OS=Homo sapiens GN=PGK1 PE=1 SV=3 - [PGK1_HUMAN]	158	87	8
A0A0C4DGB6	Serum albumin OS=Homo sapiens GN=ALB PE=1 SV=1 - [A0A0C4DGB6_HUMAN]	156		191
P08238	Heat shock protein HSP 90-beta OS=Homo sapiens GN=HSP90AB1 PE=1 SV=4 - [HS90B_HUMAN]	155	69	3
P14618	Pyruvate kinase PKM OS=Homo sapiens GN=PKM PE=1 SV=4 - [KPYM_HUMAN]	146	92	6
P13639	Elongation factor 2 OS=Homo sapiens GN=EEF2 PE=1 SV=4 - [EF2_HUMAN]	143	74	3
Q13509	Tubulin beta-3 chain OS=Homo sapiens GN=TUBB3 PE=1 SV=2 - [TBB3_HUMAN]	137
P07900	Heat shock protein HSP 90-alpha OS=Homo sapiens GN=HSP90AA1 PE=1 SV=5 - [HS90A_HUMAN]	136	64	5
P61978	Heterogeneous nuclear ribonucleoprotein K OS=Homo sapiens GN=HNRNPK PE=1 SV=1 - [HNRPK_HUMAN]	121	70	5
P42166	Lamina-associated polypeptide 2, isoform alpha OS=Homo sapiens GN=TMPO PE=1 SV=2 - [LAP2A_HUMAN]	110	63	1
P68032	Actin, alpha cardiac muscle 1 OS=Homo sapiens GN=ACTC1 PE=1 SV=1 - [ACTC_HUMAN]	107	52
P11142	Heat shock cognate 71 kDa protein OS=Homo sapiens GN=HSPA8 PE=1 SV=1 - [HSP7C_HUMAN]	105	68
Q92945	Far upstream element-binding protein 2 OS=Homo sapiens GN=KHSRP PE=1 SV=4 - [FUBP2_HUMAN]	102	74
P13647	Keratin, type II cytoskeletal 5 OS=Homo sapiens GN=KRT5 PE=1 SV=3 - [K2C5_HUMAN]	101	74	55
P22314	Ubiquitin-like modifier-activating enzyme 1 OS=Homo sapiens GN=UBA1 PE=1 SV=3 - [UBA1_HUMAN]	98	49	1
P78371	T-complex protein 1 subunit beta OS=Homo sapiens GN=CCT2 PE=1 SV=4 - [TCPB_HUMAN]	96	52
Q6S8J3	POTE ankyrin domain family member E OS=Homo sapiens GN=POTEE PE=1 SV=3 - [POTEE_HUMAN]	96	55
P04259	Keratin, type II cytoskeletal 6B OS=Homo sapiens GN=KRT6B PE=1 SV=5 - [K2C6B_HUMAN]	92	65	48
O43143	Pre-mRNA-splicing factor ATP-dependent RNA helicase DHX15 OS=Homo sapiens GN=DHX15 PE=1 SV=2 - [DHX15_HUMAN]	91	34
P04406	Glyceraldehyde-3-phosphate dehydrogenase OS=Homo sapiens GN=GAPDH PE=1 SV=3 - [G3P_HUMAN]	91	72	13
P08779	Keratin, type I cytoskeletal 16 OS=Homo sapiens GN=KRT16 PE=1 SV=4 - [K1C16_HUMAN]	90	62	40
Q60FE5	Filamin A OS=Homo sapiens GN=FLNA PE=1 SV=1 - [Q60FE5_HUMAN]	90	60
P02533	Keratin, type I cytoskeletal 14 OS=Homo sapiens GN=KRT14 PE=1 SV=4 - [K1C14_HUMAN]	84	83	43
P02538	Keratin, type II cytoskeletal 6A OS=Homo sapiens GN=KRT6A PE=1 SV=3 - [K2C6A_HUMAN]	83	60	47
Q16555	Dihydropyrimidinase-related protein 2 OS=Homo sapiens GN=DPYSL2 PE=1 SV=1 - [DPYL2_HUMAN]	83	59
P04075	Fructose-bisphosphate aldolase A OS=Homo sapiens GN=ALDOA PE=1 SV=2 - [ALDOA_HUMAN]	80	42
Q9BSJ8	Extended synaptotagmin-1 OS=Homo sapiens GN=ESYT1 PE=1 SV=1 - [ESYT1_HUMAN]	80	36	1
P22234	Multifunctional protein ADE2 OS=Homo sapiens GN=PAICS PE=1 SV=3 - [PUR6_HUMAN]	78	32
P00338	L-lactate dehydrogenase A chain OS=Homo sapiens GN=LDHA PE=1 SV=2 - [LDHA_HUMAN]	77	44	3
P06733	Alpha-enolase OS=Homo sapiens GN=ENO1 PE=1 SV=2 - [ENOA_HUMAN]	75	34	3
P13010	X-ray repair cross-complementing protein 5 OS=Homo sapiens GN=XRCC5 PE=1 SV=3 - [XRCC5_HUMAN]	74	46
P68104	Elongation factor 1-alpha 1 OS=Homo sapiens GN=EEF1A1 PE=1 SV=1 - [EF1A1_HUMAN]	74	39	7
P26599	Polypyrimidine tract-binding protein 1 OS=Homo sapiens GN=PTBP1 PE=1 SV=1 - [PTBP1_HUMAN]	73	53
P31943	Heterogeneous nuclear ribonucleoprotein H OS=Homo sapiens GN=HNRNPH1 PE=1 SV=4 - [HNRH1_HUMAN]	73	38
P40763	Signal transducer and activator of transcription 3 OS=Homo sapiens GN=STAT3 PE=1 SV=2 - [STAT3_HUMAN]	70	52
P08670	Vimentin OS=Homo sapiens GN=VIM PE=1 SV=4 - [VIME_HUMAN]	69	31
P30153	Serine/threonine-protein phosphatase 2A 65 kDa regulatory subunit A alpha isoform OS=Homo sapiens GN=PPP2R1A PE=1 SV=4 - [2AAA_HUMAN]	69	28
P07195	L-lactate dehydrogenase B chain OS=Homo sapiens GN=LDHB PE=1 SV=2 - [LDHB_HUMAN]	67	25
P12956	X-ray repair cross-complementing protein 6 OS=Homo sapiens GN=XRCC6 PE=1 SV=2 - [XRCC6_HUMAN]	64	23
P17987	T-complex protein 1 subunit alpha OS=Homo sapiens GN=TCP1 PE=1 SV=1 - [TCPA_HUMAN]	63	44
P11498	Pyruvate carboxylase, mitochondrial OS=Homo sapiens GN=PC PE=1 SV=2 - [PYC_HUMAN]	60	15	5
P53396	ATP-citrate synthase OS=Homo sapiens GN=ACLY PE=1 SV=3 - [ACLY_HUMAN]	60	41
P10809	60 kDa heat shock protein, mitochondrial OS=Homo sapiens GN=HSPD1 PE=1 SV=2 - [CH60_HUMAN]	59	51	2
P15924	Desmoplakin OS=Homo sapiens GN=DSP PE=1 SV=3 - [DESP_HUMAN]	59	40	29
P27348	14-3-3 protein theta OS=Homo sapiens GN=YWHAQ PE=1 SV=1 - [1433T_HUMAN]	59	43
Q15365	Poly(rC)-binding protein 1 OS=Homo sapiens GN=PCBP1 PE=1 SV=2 - [PCBP1_HUMAN]	59	37	1
O60664	Perilipin-3 OS=Homo sapiens GN=PLIN3 PE=1 SV=3 - [PLIN3_HUMAN]	56	24
P52597	Heterogeneous nuclear ribonucleoprotein F OS=Homo sapiens GN=HNRNPF PE=1 SV=3 - [HNRPF_HUMAN]	53	25
Q00534	Cyclin-dependent kinase 6 OS=Homo sapiens GN=CDK6 PE=1 SV=1 - [CDK6_HUMAN]	52	28
Q00839	Heterogeneous nuclear ribonucleoprotein U OS=Homo sapiens GN=HNRNPU PE=1 SV=6 - [HNRPU_HUMAN]	52	34	1
O43175	D-3-phosphoglycerate dehydrogenase OS=Homo sapiens GN=PHGDH PE=1 SV=4 - [SERA_HUMAN]	51	33
P63104	14-3-3 protein zeta/delta OS=Homo sapiens GN=YWHAZ PE=1 SV=1 - [1433Z_HUMAN]	51	27
P42704	Leucine-rich PPR motif-containing protein, mitochondrial OS=Homo sapiens GN=LRPPRC PE=1 SV=3 - [LPPRC_HUMAN]	50	32
P49915	GMP synthase [glutamine-hydrolyzing] OS=Homo sapiens GN=GMPS PE=1 SV=1 - [GUAA_HUMAN]	50	22
P60174	Triosephosphate isomerase OS=Homo sapiens GN=TPI1 PE=1 SV=3 - [TPIS_HUMAN]	50	22	8
P12004	Proliferating cell nuclear antigen OS=Homo sapiens GN=PCNA PE=1 SV=1 - [PCNA_HUMAN]	49	31	1
P55072	Transitional endoplasmic reticulum ATPase OS=Homo sapiens GN=VCP PE=1 SV=4 - [TERA_HUMAN]	49	26	1
Q96RS6	NudC domain-containing protein 1 OS=Homo sapiens GN=NUDCD1 PE=1 SV=2 - [NUDC1_HUMAN]	48	22
P08133	Annexin A6 OS=Homo sapiens GN=ANXA6 PE=1 SV=3 - [ANXA6_HUMAN]	47	35
P25205	DNA replication licensing factor MCM3 OS=Homo sapiens GN=MCM3 PE=1 SV=3 - [MCM3_HUMAN]	47	27
O00410	Importin-5 OS=Homo sapiens GN=IPO5 PE=1 SV=4 - [IPO5_HUMAN]	46	26
P35579	Myosin-9 OS=Homo sapiens GN=MYH9 PE=1 SV=4 - [MYH9_HUMAN]	45	26
O14980	Exportin-1 OS=Homo sapiens GN=XPO1 PE=1 SV=1 - [XPO1_HUMAN]	44	27
P23526	Adenosylhomocysteinase OS=Homo sapiens GN=AHCY PE=1 SV=4 - [SAHH_HUMAN]	44	22	2
P51610	Host cell factor 1 OS=Homo sapiens GN=HCFC1 PE=1 SV=2 - [HCFC1_HUMAN]	44	16
Q9P258	Protein RCC2 OS=Homo sapiens GN=RCC2 PE=1 SV=2 - [RCC2_HUMAN]	44	19
Q9UL46	Proteasome activator complex subunit 2 OS=Homo sapiens GN=PSME2 PE=1 SV=4 - [PSME2_HUMAN]	44	20
P09972	Fructose-bisphosphate aldolase C OS=Homo sapiens GN=ALDOC PE=1 SV=2 - [ALDOC_HUMAN]	43	20
Q86VP6	Cullin-associated NEDD8-dissociated protein 1 OS=Homo sapiens GN=CAND1 PE=1 SV=2 - [CAND1_HUMAN]	43	21
P45974	Ubiquitin carboxyl-terminal hydrolase 5 OS=Homo sapiens GN=USP5 PE=1 SV=2 - [UBP5_HUMAN]	42	18
Q13263	Transcription intermediary factor 1-beta OS=Homo sapiens GN=TRIM28 PE=1 SV=5 - [TIF1B_HUMAN]	42	42
Q8WUM4	Programmed cell death 6-interacting protein OS=Homo sapiens GN=PDCD6IP PE=1 SV=1 - [PDC6I_HUMAN]	42	19
E9PLK3	Puromycin-sensitive aminopeptidase OS=Homo sapiens GN=NPEPPS PE=1 SV=1 - [E9PLK3_HUMAN]	41	33	1
O60506	Heterogeneous nuclear ribonucleoprotein Q OS=Homo sapiens GN=SYNCRIP PE=1 SV=2 - [HNRPQ_HUMAN]	41	11
P09211	Glutathione S-transferase P OS=Homo sapiens GN=GSTP1 PE=1 SV=2 - [GSTP1_HUMAN]	41	44	3
P43403	Tyrosine-protein kinase ZAP-70 OS=Homo sapiens GN=ZAP70 PE=1 SV=1 - [ZAP70_HUMAN]	41	25
P50991	T-complex protein 1 subunit delta OS=Homo sapiens GN=CCT4 PE=1 SV=4 - [TCPD_HUMAN]	41	28
P62258	14-3-3 protein epsilon OS=Homo sapiens GN=YWHAE PE=1 SV=1 - [1433E_HUMAN]	41	26
B4DUR8	T-complex protein 1 subunit gamma OS=Homo sapiens GN=CCT3 PE=1 SV=1 - [B4DUR8_HUMAN]	40		1
Q14566	DNA replication licensing factor MCM6 OS=Homo sapiens GN=MCM6 PE=1 SV=1 - [MCM6_HUMAN]	40	16
A0A087X0X3	Heterogeneous nuclear ribonucleoprotein M OS=Homo sapiens GN=HNRNPM PE=1 SV=1 - [A0A087X0X3_HUMAN]	39	31
P06400	Retinoblastoma-associated protein OS=Homo sapiens GN=RB1 PE=1 SV=2 - [RB_HUMAN]	38	13
P42167	Lamina-associated polypeptide 2, isoforms beta/gamma OS=Homo sapiens GN=TMPO PE=1 SV=2 - [LAP2B_HUMAN]	38	23
P50395	Rab GDP dissociation inhibitor beta OS=Homo sapiens GN=GDI2 PE=1 SV=2 - [GDIB_HUMAN]	38
Q14974	Importin subunit beta-1 OS=Homo sapiens GN=KPNB1 PE=1 SV=2 - [IMB1_HUMAN]	38	21
P34932	Heat shock 70 kDa protein 4 OS=Homo sapiens GN=HSPA4 PE=1 SV=4 - [HSP74_HUMAN]	37	41
P41250	Glycine--tRNA ligase OS=Homo sapiens GN=GARS PE=1 SV=3 - [SYG_HUMAN]	37	17
E7ENZ3	T-complex protein 1 subunit epsilon OS=Homo sapiens GN=CCT5 PE=1 SV=1 - [E7ENZ3_HUMAN]	36
H0Y4R1	Inosine-5'-monophosphate dehydrogenase 2 (Fragment) OS=Homo sapiens GN=IMPDH2 PE=1 SV=1 - [H0Y4R1_HUMAN]	36	21
P22102	Trifunctional purine biosynthetic protein adenosine-3 OS=Homo sapiens GN=GART PE=1 SV=1 - [PUR2_HUMAN]	36	22
P26641	Elongation factor 1-gamma OS=Homo sapiens GN=EEF1G PE=1 SV=3 - [EF1G_HUMAN]	36	21	1
P43243	Matrin-3 OS=Homo sapiens GN=MATR3 PE=1 SV=2 - [MATR3_HUMAN]	36	23
Q7Z794	Keratin, type II cytoskeletal 1b OS=Homo sapiens GN=KRT77 PE=2 SV=3 - [K2C1B_HUMAN]	36	31	40
Q8N1K5	Protein THEMIS OS=Homo sapiens GN=THEMIS PE=1 SV=3 - [THMS1_HUMAN]	36
P33993	DNA replication licensing factor MCM7 OS=Homo sapiens GN=MCM7 PE=1 SV=4 - [MCM7_HUMAN]	35	23
P49736	DNA replication licensing factor MCM2 OS=Homo sapiens GN=MCM2 PE=1 SV=4 - [MCM2_HUMAN]	35	18
Q04695	Keratin, type I cytoskeletal 17 OS=Homo sapiens GN=KRT17 PE=1 SV=2 - [K1C17_HUMAN]	35	35	11
Q92841	Probable ATP-dependent RNA helicase DDX17 OS=Homo sapiens GN=DDX17 PE=1 SV=2 - [DDX17_HUMAN]	35	24
P38646	Stress-70 protein, mitochondrial OS=Homo sapiens GN=HSPA9 PE=1 SV=2 - [GRP75_HUMAN]	34	31	3
P50990	T-complex protein 1 subunit theta OS=Homo sapiens GN=CCT8 PE=1 SV=4 - [TCPQ_HUMAN]	34	26
P55795	Heterogeneous nuclear ribonucleoprotein H2 OS=Homo sapiens GN=HNRNPH2 PE=1 SV=1 - [HNRH2_HUMAN]	34	17
Q00610	Clathrin heavy chain 1 OS=Homo sapiens GN=CLTC PE=1 SV=5 - [CLH1_HUMAN]	34	25
Q14694	Ubiquitin carboxyl-terminal hydrolase 10 OS=Homo sapiens GN=USP10 PE=1 SV=2 - [UBP10_HUMAN]	34	22
B7Z645	Heterogeneous nuclear ribonucleoprotein Q OS=Homo sapiens GN=SYNCRIP PE=1 SV=1 - [B7Z645_HUMAN]	33
Q29RF7	Sister chromatid cohesion protein PDS5 homolog A OS=Homo sapiens GN=PDS5A PE=1 SV=1 - [PDS5A_HUMAN]	33	16
Q8N163	Cell cycle and apoptosis regulator protein 2 OS=Homo sapiens GN=CCAR2 PE=1 SV=2 - [CCAR2_HUMAN]	33	18
P17812	CTP synthase 1 OS=Homo sapiens GN=CTPS1 PE=1 SV=2 - [PYRG1_HUMAN]	32	15
P48735	Isocitrate dehydrogenase [NADP], mitochondrial OS=Homo sapiens GN=IDH2 PE=1 SV=2 - [IDHP_HUMAN]	32	23
P49588	Alanine--tRNA ligase, cytoplasmic OS=Homo sapiens GN=AARS PE=1 SV=2 - [SYAC_HUMAN]	32	26
P55265	Double-stranded RNA-specific adenosine deaminase OS=Homo sapiens GN=ADAR PE=1 SV=4 - [DSRAD_HUMAN]	32	16
Q15233	Non-POU domain-containing octamer-binding protein OS=Homo sapiens GN=NONO PE=1 SV=4 - [NONO_HUMAN]	32	19
Q15366	Poly(rC)-binding protein 2 OS=Homo sapiens GN=PCBP2 PE=1 SV=1 - [PCBP2_HUMAN]	32
Q8N1F7	Nuclear pore complex protein Nup93 OS=Homo sapiens GN=NUP93 PE=1 SV=2 - [NUP93_HUMAN]	32	12
Q99832	T-complex protein 1 subunit eta OS=Homo sapiens GN=CCT7 PE=1 SV=2 - [TCPH_HUMAN]	32	28
Q9HAV4	Exportin-5 OS=Homo sapiens GN=XPO5 PE=1 SV=1 - [XPO5_HUMAN]	32	21
D3YTK1	B-cell lymphoma/leukemia 11B OS=Homo sapiens GN=BCL11B PE=1 SV=1 - [D3YTK1_HUMAN]	31	20
E9PIR7	Thioredoxin reductase 1, cytoplasmic OS=Homo sapiens GN=TXNRD1 PE=1 SV=1 - [E9PIR7_HUMAN]	31	24
F8W6I7	Heterogeneous nuclear ribonucleoprotein A1 OS=Homo sapiens GN=HNRNPA1 PE=1 SV=2 - [F8W6I7_HUMAN]	31	24
P06748	Nucleophosmin OS=Homo sapiens GN=NPM1 PE=1 SV=2 - [NPM_HUMAN]	31	22
P11586	C-1-tetrahydrofolate synthase, cytoplasmic OS=Homo sapiens GN=MTHFD1 PE=1 SV=3 - [C1TC_HUMAN]	31	16
P23921	Ribonucleoside-diphosphate reductase large subunit OS=Homo sapiens GN=RRM1 PE=1 SV=1 - [RIR1_HUMAN]	31	26
P40926	Malate dehydrogenase, mitochondrial OS=Homo sapiens GN=MDH2 PE=1 SV=3 - [MDHM_HUMAN]	31	16	4
P78347	General transcription factor II-I OS=Homo sapiens GN=GTF2I PE=1 SV=2 - [GTF2I_HUMAN]	31	19
Q13085	Acetyl-CoA carboxylase 1 OS=Homo sapiens GN=ACACA PE=1 SV=2 - [ACACA_HUMAN]	31	5
Q99829	Copine-1 OS=Homo sapiens GN=CPNE1 PE=1 SV=1 - [CPNE1_HUMAN]	31
E9PKG1	Protein arginine N-methyltransferase 1 OS=Homo sapiens GN=PRMT1 PE=1 SV=1 - [E9PKG1_HUMAN]	30	26
J3KTA4	Probable ATP-dependent RNA helicase DDX5 OS=Homo sapiens GN=DDX5 PE=1 SV=1 - [J3KTA4_HUMAN]	30	16
P14923	Junction plakoglobin OS=Homo sapiens GN=JUP PE=1 SV=3 - [PLAK_HUMAN]	30	25	19
P06744	Glucose-6-phosphate isomerase OS=Homo sapiens GN=GPI PE=1 SV=4 - [G6PI_HUMAN]	29	8
P31946	14-3-3 protein beta/alpha OS=Homo sapiens GN=YWHAB PE=1 SV=3 - [1433B_HUMAN]	29	23
P40227	T-complex protein 1 subunit zeta OS=Homo sapiens GN=CCT6A PE=1 SV=3 - [TCPZ_HUMAN]	29	13
Q01196	Runt-related transcription factor 1 OS=Homo sapiens GN=RUNX1 PE=1 SV=3 - [RUNX1_HUMAN]	29	14
Q96GX5	Serine/threonine-protein kinase greatwall OS=Homo sapiens GN=MASTL PE=1 SV=1 - [GWL_HUMAN]	29	18
O75083	WD repeat-containing protein 1 OS=Homo sapiens GN=WDR1 PE=1 SV=4 - [WDR1_HUMAN]	28	20
P23396	40S ribosomal protein S3 OS=Homo sapiens GN=RPS3 PE=1 SV=2 - [RS3_HUMAN]	28	14
P60842	Eukaryotic initiation factor 4A-I OS=Homo sapiens GN=EIF4A1 PE=1 SV=1 - [IF4A1_HUMAN]	28	14
Q9Y265	RuvB-like 1 OS=Homo sapiens GN=RUVBL1 PE=1 SV=1 - [RUVB1_HUMAN]	28	20
O14929	Histone acetyltransferase type B catalytic subunit OS=Homo sapiens GN=HAT1 PE=1 SV=1 - [HAT1_HUMAN]	27	13
Q08211	ATP-dependent RNA helicase A OS=Homo sapiens GN=DHX9 PE=1 SV=4 - [DHX9_HUMAN]	27	16
P06239	Tyrosine-protein kinase Lck OS=Homo sapiens GN=LCK PE=1 SV=6 - [LCK_HUMAN]	26	15
P48147	Prolyl endopeptidase OS=Homo sapiens GN=PREP PE=1 SV=2 - [PPCE_HUMAN]	26	11
Q93009	Ubiquitin carboxyl-terminal hydrolase 7 OS=Homo sapiens GN=USP7 PE=1 SV=2 - [UBP7_HUMAN]	26	8
Q99714	3-hydroxyacyl-CoA dehydrogenase type-2 OS=Homo sapiens GN=HSD17B10 PE=1 SV=3 - [HCD2_HUMAN]	26	18
Q9Y490	Talin-1 OS=Homo sapiens GN=TLN1 PE=1 SV=3 - [TLN1_HUMAN]	26	16
B4DY09	Interleukin enhancer-binding factor 2 OS=Homo sapiens GN=ILF2 PE=1 SV=1 - [B4DY09_HUMAN]	25	16
O00148	ATP-dependent RNA helicase DDX39A OS=Homo sapiens GN=DDX39A PE=1 SV=2 - [DX39A_HUMAN]	25	9
O75369	Filamin-B OS=Homo sapiens GN=FLNB PE=1 SV=2 - [FLNB_HUMAN]	25	29
P51692	Signal transducer and activator of transcription 5B OS=Homo sapiens GN=STAT5B PE=1 SV=2 - [STA5B_HUMAN]	25	19
P52732	Kinesin-like protein KIF11 OS=Homo sapiens GN=KIF11 PE=1 SV=2 - [KIF11_HUMAN]	25	21
Q92598	Heat shock protein 105 kDa OS=Homo sapiens GN=HSPH1 PE=1 SV=1 - [HS105_HUMAN]	25	21
A0A087WWU8	Tropomyosin alpha-3 chain OS=Homo sapiens GN=TPM3 PE=1 SV=1 - [A0A087WWU8_HUMAN]	24
P46063	ATP-dependent DNA helicase Q1 OS=Homo sapiens GN=RECQL PE=1 SV=3 - [RECQ1_HUMAN]	24	8
P52306	Rap1 GTPase-GDP dissociation stimulator 1 OS=Homo sapiens GN=RAP1GDS1 PE=1 SV=3 - [GDS1_HUMAN]	24	13
P55060	Exportin-2 OS=Homo sapiens GN=CSE1L PE=1 SV=3 - [XPO2_HUMAN]	24	15
P61981	14-3-3 protein gamma OS=Homo sapiens GN=YWHAG PE=1 SV=2 - [1433G_HUMAN]	24	20
A0A0D9SF54	Spectrin alpha chain, non-erythrocytic 1 OS=Homo sapiens GN=SPTAN1 PE=1 SV=1 - [A0A0D9SF54_HUMAN]	23	22
D6RAF8	Heterogeneous nuclear ribonucleoprotein D0 (Fragment) OS=Homo sapiens GN=HNRNPD PE=1 SV=1 - [D6RAF8_HUMAN]	23	12
F5H6Q2	Polyubiquitin-C (Fragment) OS=Homo sapiens GN=UBC PE=1 SV=6 - [F5H6Q2_HUMAN]	23
P22626	Heterogeneous nuclear ribonucleoproteins A2/B1 OS=Homo sapiens GN=HNRNPA2B1 PE=1 SV=2 - [ROA2_HUMAN]	23	10
P28340	DNA polymerase delta catalytic subunit OS=Homo sapiens GN=POLD1 PE=1 SV=2 - [DPOD1_HUMAN]	23
P49321	Nuclear autoantigenic sperm protein OS=Homo sapiens GN=NASP PE=1 SV=2 - [NASP_HUMAN]	23	15
G8JLD5	Dynamin-1-like protein OS=Homo sapiens GN=DNM1L PE=1 SV=1 - [G8JLD5_HUMAN]	22	4
O95336	6-phosphogluconolactonase OS=Homo sapiens GN=PGLS PE=1 SV=2 - [6PGL_HUMAN]	22	9
P04843	Dolichyl-diphosphooligosaccharide--protein glycosyltransferase subunit 1 OS=Homo sapiens GN=RPN1 PE=1 SV=1 - [RPN1_HUMAN]	22	19
P26038	Moesin OS=Homo sapiens GN=MSN PE=1 SV=3 - [MOES_HUMAN]	22	11
P54886	Delta-1-pyrroline-5-carboxylate synthase OS=Homo sapiens GN=ALDH18A1 PE=1 SV=2 - [P5CS_HUMAN]	22	13
Q13838	Spliceosome RNA helicase DDX39B OS=Homo sapiens GN=DDX39B PE=1 SV=1 - [DX39B_HUMAN]	22	8
Q7KZF4	Staphylococcal nuclease domain-containing protein 1 OS=Homo sapiens GN=SND1 PE=1 SV=1 - [SND1_HUMAN]	22	19
F8VWS0	60S acidic ribosomal protein P0 OS=Homo sapiens GN=RPLP0 PE=1 SV=1 - [F8VWS0_HUMAN]	21
M0QXS5	Heterogeneous nuclear ribonucleoprotein L (Fragment) OS=Homo sapiens GN=HNRNPL PE=1 SV=1 - [M0QXS5_HUMAN]	21
P04083	Annexin A1 OS=Homo sapiens GN=ANXA1 PE=1 SV=2 - [ANXA1_HUMAN]	21	14
P04899	Guanine nucleotide-binding protein G(i) subunit alpha-2 OS=Homo sapiens GN=GNAI2 PE=1 SV=3 - [GNAI2_HUMAN]	21	17
P11021	78 kDa glucose-regulated protein OS=Homo sapiens GN=HSPA5 PE=1 SV=2 - [GRP78_HUMAN]	21	26
P25705	ATP synthase subunit alpha, mitochondrial OS=Homo sapiens GN=ATP5A1 PE=1 SV=1 - [ATPA_HUMAN]	21	13
P31146	Coronin-1A OS=Homo sapiens GN=CORO1A PE=1 SV=4 - [COR1A_HUMAN]	21	13
P31948	Stress-induced-phosphoprotein 1 OS=Homo sapiens GN=STIP1 PE=1 SV=1 - [STIP1_HUMAN]	21	5
P49790	Nuclear pore complex protein Nup153 OS=Homo sapiens GN=NUP153 PE=1 SV=2 - [NU153_HUMAN]	21	2
P53618	Coatomer subunit beta OS=Homo sapiens GN=COPB1 PE=1 SV=3 - [COPB_HUMAN]	21	6
P61221	ATP-binding cassette sub-family E member 1 OS=Homo sapiens GN=ABCE1 PE=1 SV=1 - [ABCE1_HUMAN]	21
Q6P2E9	Enhancer of mRNA-decapping protein 4 OS=Homo sapiens GN=EDC4 PE=1 SV=1 - [EDC4_HUMAN]	21	10
Q9NT62	Ubiquitin-like-conjugating enzyme ATG3 OS=Homo sapiens GN=ATG3 PE=1 SV=1 - [ATG3_HUMAN]	21	15
F5GWI4	Adenosine deaminase OS=Homo sapiens GN=ADA PE=1 SV=1 - [F5GWI4_HUMAN]	20	4
P07237	Protein disulfide-isomerase OS=Homo sapiens GN=P4HB PE=1 SV=3 - [PDIA1_HUMAN]	20	17
P19338	Nucleolin OS=Homo sapiens GN=NCL PE=1 SV=3 - [NUCL_HUMAN]	20	18
P31939	Bifunctional purine biosynthesis protein PURH OS=Homo sapiens GN=ATIC PE=1 SV=3 - [PUR9_HUMAN]	20	15
P43246	DNA mismatch repair protein Msh2 OS=Homo sapiens GN=MSH2 PE=1 SV=1 - [MSH2_HUMAN]	20	9
P51812	Ribosomal protein S6 kinase alpha-3 OS=Homo sapiens GN=RPS6KA3 PE=1 SV=1 - [KS6A3_HUMAN]	20	6
Q13547	Histone deacetylase 1 OS=Homo sapiens GN=HDAC1 PE=1 SV=1 - [HDAC1_HUMAN]	20	14
Q16666	Gamma-interferon-inducible protein 16 OS=Homo sapiens GN=IFI16 PE=1 SV=3 - [IF16_HUMAN]	20	9
Q9NTK5	Obg-like ATPase 1 OS=Homo sapiens GN=OLA1 PE=1 SV=2 - [OLA1_HUMAN]	20	5
Q9NUQ9	Protein FAM49B OS=Homo sapiens GN=FAM49B PE=1 SV=1 - [FA49B_HUMAN]	20	20
Q9Y4C1	Lysine-specific demethylase 3A OS=Homo sapiens GN=KDM3A PE=1 SV=4 - [KDM3A_HUMAN]	20	5
K7EK35	Signal transducer and activator of transcription OS=Homo sapiens GN=STAT5A PE=1 SV=1 - [K7EK35_HUMAN]	19	14
O43390	Heterogeneous nuclear ribonucleoprotein R OS=Homo sapiens GN=HNRNPR PE=1 SV=1 - [HNRPR_HUMAN]	19	14
P14625	Endoplasmin OS=Homo sapiens GN=HSP90B1 PE=1 SV=1 - [ENPL_HUMAN]	19	13
P20700	Lamin-B1 OS=Homo sapiens GN=LMNB1 PE=1 SV=2 - [LMNB1_HUMAN]	19
P29590	Protein PML OS=Homo sapiens GN=PML PE=1 SV=3 - [PML_HUMAN]	19	14
P30566	Adenylosuccinate lyase OS=Homo sapiens GN=ADSL PE=1 SV=2 - [PUR8_HUMAN]	19	10
P54687	Branched-chain-amino-acid aminotransferase, cytosolic OS=Homo sapiens GN=BCAT1 PE=1 SV=3 - [BCAT1_HUMAN]	19	11
Q04917	14-3-3 protein eta OS=Homo sapiens GN=YWHAH PE=1 SV=4 - [1433F_HUMAN]	19	12
Q9UBB4	Ataxin-10 OS=Homo sapiens GN=ATXN10 PE=1 SV=1 - [ATX10_HUMAN]	19	6
A0A0D9SFB3	ATP-dependent RNA helicase DDX3X OS=Homo sapiens GN=DDX3X PE=1 SV=1 - [A0A0D9SFB3_HUMAN]	18	11
B1AK87	Capping protein (Actin filament) muscle Z-line, beta, isoform CRA_a OS=Homo sapiens GN=CAPZB PE=1 SV=1 - [B1AK87_HUMAN]	18	11
F8W020	Nucleosome assembly protein 1-like 1 (Fragment) OS=Homo sapiens GN=NAP1L1 PE=1 SV=1 - [F8W020_HUMAN]	18	10
O75663	TIP41-like protein OS=Homo sapiens GN=TIPRL PE=1 SV=2 - [TIPRL_HUMAN]	18	3
P33991	DNA replication licensing factor MCM4 OS=Homo sapiens GN=MCM4 PE=1 SV=5 - [MCM4_HUMAN]	18	7
P33992	DNA replication licensing factor MCM5 OS=Homo sapiens GN=MCM5 PE=1 SV=5 - [MCM5_HUMAN]	18
P42575	Caspase-2 OS=Homo sapiens GN=CASP2 PE=1 SV=2 - [CASP2_HUMAN]	18	7
Q01813	ATP-dependent 6-phosphofructokinase, platelet type OS=Homo sapiens GN=PFKP PE=1 SV=2 - [PFKAP_HUMAN]	18	11
Q16543	Hsp90 co-chaperone Cdc37 OS=Homo sapiens GN=CDC37 PE=1 SV=1 - [CDC37_HUMAN]	18	9
Q8N1N4	Keratin, type II cytoskeletal 78 OS=Homo sapiens GN=KRT78 PE=2 SV=2 - [K2C78_HUMAN]	18	13	10
Q92556	Engulfment and cell motility protein 1 OS=Homo sapiens GN=ELMO1 PE=1 SV=2 - [ELMO1_HUMAN]	18	5
Q9Y277	Voltage-dependent anion-selective channel protein 3 OS=Homo sapiens GN=VDAC3 PE=1 SV=1 - [VDAC3_HUMAN]	18	5
Q9Y3F4	Serine-threonine kinase receptor-associated protein OS=Homo sapiens GN=STRAP PE=1 SV=1 - [STRAP_HUMAN]	18	11
O15067	Phosphoribosylformylglycinamidine synthase OS=Homo sapiens GN=PFAS PE=1 SV=4 - [PUR4_HUMAN]	17	7
O15355	Protein phosphatase 1G OS=Homo sapiens GN=PPM1G PE=1 SV=1 - [PPM1G_HUMAN]	17	6
O15523	ATP-dependent RNA helicase DDX3Y OS=Homo sapiens GN=DDX3Y PE=1 SV=2 - [DDX3Y_HUMAN]	17
O75131	Copine-3 OS=Homo sapiens GN=CPNE3 PE=1 SV=1 - [CPNE3_HUMAN]	17	8
Q9Y2Z0	Protein SGT1 homolog OS=Homo sapiens GN=SUGT1 PE=1 SV=3 - [SGT1_HUMAN]	17	2
A0A087WTT1	Polyadenylate-binding protein OS=Homo sapiens GN=PABPC1 PE=1 SV=1 - [A0A087WTT1_HUMAN]	16	9
A6PVN5	Serine/threonine-protein phosphatase 2A activator OS=Homo sapiens GN=PPP2R4 PE=1 SV=1 - [A6PVN5_HUMAN]	16
E9PHI6	Cytoplasmic dynein 1 light intermediate chain 1 OS=Homo sapiens GN=DYNC1LI1 PE=1 SV=1 - [E9PHI6_HUMAN]	16
P12081	Histidine--tRNA ligase, cytoplasmic OS=Homo sapiens GN=HARS PE=1 SV=2 - [SYHC_HUMAN]	16	13
P14868	Aspartate--tRNA ligase, cytoplasmic OS=Homo sapiens GN=DARS PE=1 SV=2 - [SYDC_HUMAN]	16	8
P40121	Macrophage-capping protein OS=Homo sapiens GN=CAPG PE=1 SV=2 - [CAPG_HUMAN]	16	8
P52292	Importin subunit alpha-1 OS=Homo sapiens GN=KPNA2 PE=1 SV=1 - [IMA1_HUMAN]	16	20
P54136	Arginine--tRNA ligase, cytoplasmic OS=Homo sapiens GN=RARS PE=1 SV=2 - [SYRC_HUMAN]	16	11
P63151	Serine/threonine-protein phosphatase 2A 55 kDa regulatory subunit B alpha isoform OS=Homo sapiens GN=PPP2R2A PE=1 SV=1 - [2ABA_HUMAN]	16	7
Q14166	Tubulin--tyrosine ligase-like protein 12 OS=Homo sapiens GN=TTLL12 PE=1 SV=2 - [TTL12_HUMAN]	16	9
Q15717	ELAV-like protein 1 OS=Homo sapiens GN=ELAVL1 PE=1 SV=2 - [ELAV1_HUMAN]	16	10
Q16643	Drebrin OS=Homo sapiens GN=DBN1 PE=1 SV=4 - [DREB_HUMAN]	16	11
Q7RTS7	Keratin, type II cytoskeletal 74 OS=Homo sapiens GN=KRT74 PE=1 SV=2 - [K2C74_HUMAN]	16
Q9BTE3	Mini-chromosome maintenance complex-binding protein OS=Homo sapiens GN=MCMBP PE=1 SV=2 - [MCMBP_HUMAN]	16	10
Q9ULW0	Targeting protein for Xklp2 OS=Homo sapiens GN=TPX2 PE=1 SV=2 - [TPX2_HUMAN]	16	8
A0A0A0MR02	Voltage-dependent anion-selective channel protein 2 (Fragment) OS=Homo sapiens GN=VDAC2 PE=1 SV=1 - [A0A0A0MR02_HUMAN]	15	12
E7EVJ5	Cytoplasmic FMR1-interacting protein 2 OS=Homo sapiens GN=CYFIP2 PE=1 SV=1 - [E7EVJ5_HUMAN]	15	14
E9PHY5	Band 4.1-like protein 2 OS=Homo sapiens GN=EPB41L2 PE=1 SV=1 - [E9PHY5_HUMAN]	15	17
P07384	Calpain-1 catalytic subunit OS=Homo sapiens GN=CAPN1 PE=1 SV=1 - [CAN1_HUMAN]	15	5
P18669	Phosphoglycerate mutase 1 OS=Homo sapiens GN=PGAM1 PE=1 SV=2 - [PGAM1_HUMAN]	15	11
Q02413	Desmoglein-1 OS=Homo sapiens GN=DSG1 PE=1 SV=2 - [DSG1_HUMAN]	15	17	13
Q07666	KH domain-containing, RNA-binding, signal transduction-associated protein 1 OS=Homo sapiens GN=KHDRBS1 PE=1 SV=1 - [KHDR1_HUMAN]	15	8
Q5JTZ9	Alanine--tRNA ligase, mitochondrial OS=Homo sapiens GN=AARS2 PE=1 SV=1 - [SYAM_HUMAN]	15	7
Q9UJZ1	Stomatin-like protein 2, mitochondrial OS=Homo sapiens GN=STOML2 PE=1 SV=1 - [STML2_HUMAN]	15	2
Q9Y266	Nuclear migration protein nudC OS=Homo sapiens GN=NUDC PE=1 SV=1 - [NUDC_HUMAN]	15	1
Q9Y2X3	Nucleolar protein 58 OS=Homo sapiens GN=NOP58 PE=1 SV=1 - [NOP58_HUMAN]	15	6
Q9Y312	Protein AAR2 homolog OS=Homo sapiens GN=AAR2 PE=1 SV=2 - [AAR2_HUMAN]	15	2
E9PFH4	Transportin-3 OS=Homo sapiens GN=TNPO3 PE=1 SV=1 - [E9PFH4_HUMAN]	14
I3L0K7	Heat shock protein 75 kDa, mitochondrial OS=Homo sapiens GN=TRAP1 PE=1 SV=1 - [I3L0K7_HUMAN]	14
K9J957	Proteasome activator complex subunit 3 OS=Homo sapiens GN=PSME3 PE=1 SV=1 - [K9J957_HUMAN]	14	13
O00170	AH receptor-interacting protein OS=Homo sapiens GN=AIP PE=1 SV=2 - [AIP_HUMAN]	14	9
O43264	Centromere/kinetochore protein zw10 homolog OS=Homo sapiens GN=ZW10 PE=1 SV=3 - [ZW10_HUMAN]	14	8
P00492	Hypoxanthine-guanine phosphoribosyltransferase OS=Homo sapiens GN=HPRT1 PE=1 SV=2 - [HPRT_HUMAN]	14	6
P36578	60S ribosomal protein L4 OS=Homo sapiens GN=RPL4 PE=1 SV=5 - [RL4_HUMAN]	14	10
P42224	Signal transducer and activator of transcription 1-alpha/beta OS=Homo sapiens GN=STAT1 PE=1 SV=2 - [STAT1_HUMAN]	14	11
P62136	Serine/threonine-protein phosphatase PP1-alpha catalytic subunit OS=Homo sapiens GN=PPP1CA PE=1 SV=1 - [PP1A_HUMAN]	14
P67936	Tropomyosin alpha-4 chain OS=Homo sapiens GN=TPM4 PE=1 SV=3 - [TPM4_HUMAN]	14	5
Q06323	Proteasome activator complex subunit 1 OS=Homo sapiens GN=PSME1 PE=1 SV=1 - [PSME1_HUMAN]	14	11
Q12906	Interleukin enhancer-binding factor 3 OS=Homo sapiens GN=ILF3 PE=1 SV=3 - [ILF3_HUMAN]	14	12
Q16512	Serine/threonine-protein kinase N1 OS=Homo sapiens GN=PKN1 PE=1 SV=2 - [PKN1_HUMAN]	14	5
Q2VPK5	Cytoplasmic tRNA 2-thiolation protein 2 OS=Homo sapiens GN=CTU2 PE=1 SV=1 - [CTU2_HUMAN]	14	9
Q7LBC6	Lysine-specific demethylase 3B OS=Homo sapiens GN=KDM3B PE=1 SV=2 - [KDM3B_HUMAN]	14	8
Q9H9A6	Leucine-rich repeat-containing protein 40 OS=Homo sapiens GN=LRRC40 PE=1 SV=1 - [LRC40_HUMAN]	14	9
B5MDQ0	DNA excision repair protein ERCC-6-like OS=Homo sapiens GN=ERCC6L PE=1 SV=1 - [B5MDQ0_HUMAN]	13	16
E1CEI4	Glutamate--cysteine ligase catalytic subunit OS=Homo sapiens GN=GCLC PE=1 SV=1 - [E1CEI4_HUMAN]	13
G3V4W0	Heterogeneous nuclear ribonucleoproteins C1/C2 (Fragment) OS=Homo sapiens GN=HNRNPC PE=1 SV=1 - [G3V4W0_HUMAN]	13	11
H0Y3Y4	Septin-7 (Fragment) OS=Homo sapiens GN=SEPT7 PE=1 SV=1 - [H0Y3Y4_HUMAN]	13
P11413	Glucose-6-phosphate 1-dehydrogenase OS=Homo sapiens GN=G6PD PE=1 SV=4 - [G6PD_HUMAN]	13	6
P13489	Ribonuclease inhibitor OS=Homo sapiens GN=RNH1 PE=1 SV=2 - [RINI_HUMAN]	13	7
P34931	Heat shock 70 kDa protein 1-like OS=Homo sapiens GN=HSPA1L PE=1 SV=2 - [HS71L_HUMAN]	13
P56192	Methionine--tRNA ligase, cytoplasmic OS=Homo sapiens GN=MARS PE=1 SV=2 - [SYMC_HUMAN]	13	6
P57764	Gasdermin-D OS=Homo sapiens GN=GSDMD PE=1 SV=1 - [GSDMD_HUMAN]	13	5
Q8N6M0	OTU domain-containing protein 6B OS=Homo sapiens GN=OTUD6B PE=1 SV=1 - [OTU6B_HUMAN]	13	1
Q9Y5Q8	General transcription factor 3C polypeptide 5 OS=Homo sapiens GN=GTF3C5 PE=1 SV=2 - [TF3C5_HUMAN]	13
Q9Y678	Coatomer subunit gamma-1 OS=Homo sapiens GN=COPG1 PE=1 SV=1 - [COPG1_HUMAN]	13	6
A0A087WUK2	Heterogeneous nuclear ribonucleoprotein D-like OS=Homo sapiens GN=HNRNPDL PE=1 SV=1 - [A0A087WUK2_HUMAN]	12	4
A0A087WY61	Nuclear mitotic apparatus protein 1 OS=Homo sapiens GN=NUMA1 PE=1 SV=1 - [A0A087WY61_HUMAN]	12	18
A0A0B4J1R6	Transketolase OS=Homo sapiens GN=TKT PE=1 SV=1 - [A0A0B4J1R6_HUMAN]	12	8
A6NNK5	Tumor suppressor p53-binding protein 1 OS=Homo sapiens GN=TP53BP1 PE=1 SV=2 - [A6NNK5_HUMAN]	12
B1AMS2	Septin 6, isoform CRA_b OS=Homo sapiens GN=SEPT6 PE=1 SV=1 - [B1AMS2_HUMAN]	12	10
C9JQ72	Cysteine protease ATG4B (Fragment) OS=Homo sapiens GN=ATG4B PE=1 SV=1 - [C9JQ72_HUMAN]	12
E9PC52	Histone-binding protein RBBP7 OS=Homo sapiens GN=RBBP7 PE=1 SV=1 - [E9PC52_HUMAN]	12	7
F8VPD4	CAD protein OS=Homo sapiens GN=CAD PE=1 SV=1 - [F8VPD4_HUMAN]	12	5
H3BR35	Eukaryotic peptide chain release factor GTP-binding subunit ERF3A (Fragment) OS=Homo sapiens GN=GSPT1 PE=1 SV=1 - [H3BR35_HUMAN]	12	6
J9JIC5	Protein Njmu-R1 OS=Homo sapiens GN=C17orf75 PE=1 SV=1 - [J9JIC5_HUMAN]	12	4
O00299	Chloride intracellular channel protein 1 OS=Homo sapiens GN=CLIC1 PE=1 SV=4 - [CLIC1_HUMAN]	12	9	1
O60343	TBC1 domain family member 4 OS=Homo sapiens GN=TBC1D4 PE=1 SV=2 - [TBCD4_HUMAN]	12	10
P07737	Profilin-1 OS=Homo sapiens GN=PFN1 PE=1 SV=2 - [PROF1_HUMAN]	12	11
P23246	Splicing factor, proline- and glutamine-rich OS=Homo sapiens GN=SFPQ PE=1 SV=2 - [SFPQ_HUMAN]	12	8
P38919	Eukaryotic initiation factor 4A-III OS=Homo sapiens GN=EIF4A3 PE=1 SV=4 - [IF4A3_HUMAN]	12	6
P51991	Heterogeneous nuclear ribonucleoprotein A3 OS=Homo sapiens GN=HNRNPA3 PE=1 SV=2 - [ROA3_HUMAN]	12	13
P52209	6-phosphogluconate dehydrogenase, decarboxylating OS=Homo sapiens GN=PGD PE=1 SV=3 - [6PGD_HUMAN]	12	10
P63244	Guanine nucleotide-binding protein subunit beta-2-like 1 OS=Homo sapiens GN=GNB2L1 PE=1 SV=3 - [GBLP_HUMAN]	12	10
Q00535	Cyclin-dependent-like kinase 5 OS=Homo sapiens GN=CDK5 PE=1 SV=3 - [CDK5_HUMAN]	12	4
Q13200	26S proteasome non-ATPase regulatory subunit 2 OS=Homo sapiens GN=PSMD2 PE=1 SV=3 - [PSMD2_HUMAN]	12	12
Q16698	2,4-dienoyl-CoA reductase, mitochondrial OS=Homo sapiens GN=DECR1 PE=1 SV=1 - [DECR_HUMAN]	12
Q86YS7	C2 domain-containing protein 5 OS=Homo sapiens GN=C2CD5 PE=1 SV=1 - [C2CD5_HUMAN]	12	3
Q9BW19	Kinesin-like protein KIFC1 OS=Homo sapiens GN=KIFC1 PE=1 SV=2 - [KIFC1_HUMAN]	12	6
Q9H0D6	5'-3' exoribonuclease 2 OS=Homo sapiens GN=XRN2 PE=1 SV=1 - [XRN2_HUMAN]	12	3
Q9NYL9	Tropomodulin-3 OS=Homo sapiens GN=TMOD3 PE=1 SV=1 - [TMOD3_HUMAN]	12
A0A0B4J1W3	N-alpha-acetyltransferase 15, NatA auxiliary subunit OS=Homo sapiens GN=NAA15 PE=1 SV=1 - [A0A0B4J1W3_HUMAN]	11	3
B4DXW1	Actin-related protein 3 OS=Homo sapiens GN=ACTR3 PE=1 SV=1 - [B4DXW1_HUMAN]	11	7
E7EX73	Eukaryotic translation initiation factor 4 gamma 1 OS=Homo sapiens GN=EIF4G1 PE=1 SV=1 - [E7EX73_HUMAN]	11	6
H0YEN5	40S ribosomal protein S2 (Fragment) OS=Homo sapiens GN=RPS2 PE=1 SV=1 - [H0YEN5_HUMAN]	11	4
H7C3P6	Nuclear pore complex protein Nup98-Nup96 (Fragment) OS=Homo sapiens GN=NUP98 PE=1 SV=1 - [H7C3P6_HUMAN]	11	3
K7ES69	Calponin-2 OS=Homo sapiens GN=CNN2 PE=1 SV=1 - [K7ES69_HUMAN]	11
O00505	Importin subunit alpha-4 OS=Homo sapiens GN=KPNA3 PE=1 SV=2 - [IMA4_HUMAN]	11	4
O00567	Nucleolar protein 56 OS=Homo sapiens GN=NOP56 PE=1 SV=4 - [NOP56_HUMAN]	11	7
P08758	Annexin A5 OS=Homo sapiens GN=ANXA5 PE=1 SV=2 - [ANXA5_HUMAN]	11	6
P12236	ADP/ATP translocase 3 OS=Homo sapiens GN=SLC25A6 PE=1 SV=4 - [ADT3_HUMAN]	11	7
P19174	1-phosphatidylinositol 4,5-bisphosphate phosphodiesterase gamma-1 OS=Homo sapiens GN=PLCG1 PE=1 SV=1 - [PLCG1_HUMAN]	11	14
P52888	Thimet oligopeptidase OS=Homo sapiens GN=THOP1 PE=1 SV=2 - [THOP1_HUMAN]	11	11
Q06203	Amidophosphoribosyltransferase OS=Homo sapiens GN=PPAT PE=1 SV=1 - [PUR1_HUMAN]	11	9
Q15181	Inorganic pyrophosphatase OS=Homo sapiens GN=PPA1 PE=1 SV=2 - [IPYR_HUMAN]	11	5
Q6UWP8	Suprabasin OS=Homo sapiens GN=SBSN PE=1 SV=2 - [SBSN_HUMAN]	11	2	3
Q8NBY1	Serine/threonine-protein kinase 26 OS=Homo sapiens GN=STK26 PE=1 SV=1 - [Q8NBY1_HUMAN]	11	7
Q92769	Histone deacetylase 2 OS=Homo sapiens GN=HDAC2 PE=1 SV=2 - [HDAC2_HUMAN]	11	10
Q99536	Synaptic vesicle membrane protein VAT-1 homolog OS=Homo sapiens GN=VAT1 PE=1 SV=2 - [VAT1_HUMAN]	11	6
Q9UHD8	Septin-9 OS=Homo sapiens GN=SEPT9 PE=1 SV=2 - [SEPT9_HUMAN]	11	5
Q9UKG1	DCC-interacting protein 13-alpha OS=Homo sapiens GN=APPL1 PE=1 SV=1 - [DP13A_HUMAN]	11	10
Q9UKX7	Nuclear pore complex protein Nup50 OS=Homo sapiens GN=NUP50 PE=1 SV=2 - [NUP50_HUMAN]	11	4
Q9UQ80	Proliferation-associated protein 2G4 OS=Homo sapiens GN=PA2G4 PE=1 SV=3 - [PA2G4_HUMAN]	11	3
C9J0I9	Nuclear-interacting partner of ALK OS=Homo sapiens GN=ZC3HC1 PE=1 SV=1 - [C9J0I9_HUMAN]	10	4
C9J1E7	AP-1 complex subunit beta-1 (Fragment) OS=Homo sapiens GN=AP1B1 PE=1 SV=1 - [C9J1E7_HUMAN]	10
E7EQR4	Ezrin OS=Homo sapiens GN=EZR PE=1 SV=3 - [E7EQR4_HUMAN]	10	5
E9PF10	Nuclear pore complex protein Nup155 OS=Homo sapiens GN=NUP155 PE=1 SV=1 - [E9PF10_HUMAN]	10	9
E9PFI5	40S ribosomal protein S3a OS=Homo sapiens GN=RPS3A PE=1 SV=1 - [E9PFI5_HUMAN]	10
F5H5P4	Proto-oncogene vav OS=Homo sapiens GN=VAV1 PE=1 SV=2 - [F5H5P4_HUMAN]	10	4
F8VVM2	Phosphate carrier protein, mitochondrial OS=Homo sapiens GN=SLC25A3 PE=1 SV=1 - [F8VVM2_HUMAN]	10	3
J3QT28	Mitotic checkpoint protein BUB3 (Fragment) OS=Homo sapiens GN=BUB3 PE=1 SV=1 - [J3QT28_HUMAN]	10	5
O00487	26S proteasome non-ATPase regulatory subunit 14 OS=Homo sapiens GN=PSMD14 PE=1 SV=1 - [PSDE_HUMAN]	10	5
O75152	Zinc finger CCCH domain-containing protein 11A OS=Homo sapiens GN=ZC3H11A PE=1 SV=3 - [ZC11A_HUMAN]	10
P05141	ADP/ATP translocase 2 OS=Homo sapiens GN=SLC25A5 PE=1 SV=7 - [ADT2_HUMAN]	10	7
P24534	Elongation factor 1-beta OS=Homo sapiens GN=EEF1B2 PE=1 SV=3 - [EF1B_HUMAN]	10	6
P34897	Serine hydroxymethyltransferase, mitochondrial OS=Homo sapiens GN=SHMT2 PE=1 SV=3 - [GLYM_HUMAN]	10
P49411	Elongation factor Tu, mitochondrial OS=Homo sapiens GN=TUFM PE=1 SV=2 - [EFTU_HUMAN]	10	10
Q5QNY5	Peroxisomal biogenesis factor 19 (Fragment) OS=Homo sapiens GN=PEX19 PE=1 SV=1 - [Q5QNY5_HUMAN]	10	8
Q8IX90	Spindle and kinetochore-associated protein 3 OS=Homo sapiens GN=SKA3 PE=1 SV=2 - [SKA3_HUMAN]	10	7
Q8TC07	TBC1 domain family member 15 OS=Homo sapiens GN=TBC1D15 PE=1 SV=2 - [TBC15_HUMAN]	10	5
Q92667	A-kinase anchor protein 1, mitochondrial OS=Homo sapiens GN=AKAP1 PE=1 SV=1 - [AKAP1_HUMAN]	10	7
Q9P2J5	Leucine--tRNA ligase, cytoplasmic OS=Homo sapiens GN=LARS PE=1 SV=2 - [SYLC_HUMAN]	10	4
Q9UI12	V-type proton ATPase subunit H OS=Homo sapiens GN=ATP6V1H PE=1 SV=1 - [VATH_HUMAN]	10
Q9Y230	RuvB-like 2 OS=Homo sapiens GN=RUVBL2 PE=1 SV=3 - [RUVB2_HUMAN]	10	10
Q9Y570	Protein phosphatase methylesterase 1 OS=Homo sapiens GN=PPME1 PE=1 SV=3 - [PPME1_HUMAN]	10	3
A0A087X253	AP-2 complex subunit beta OS=Homo sapiens GN=AP2B1 PE=1 SV=1 - [A0A087X253_HUMAN]	9
A0AVT1	Ubiquitin-like modifier-activating enzyme 6 OS=Homo sapiens GN=UBA6 PE=1 SV=1 - [UBA6_HUMAN]	9
B1ALK7	Rho guanine nucleotide exchange factor 7 OS=Homo sapiens GN=ARHGEF7 PE=1 SV=1 - [B1ALK7_HUMAN]	9	2
E7EV99	Alpha-adducin OS=Homo sapiens GN=ADD1 PE=1 SV=1 - [E7EV99_HUMAN]	9	11
E9PDE8	Heat shock 70 kDa protein 4L OS=Homo sapiens GN=HSPA4L PE=1 SV=1 - [E9PDE8_HUMAN]	9
E9PLT0	Cold shock domain-containing protein E1 OS=Homo sapiens GN=CSDE1 PE=1 SV=1 - [E9PLT0_HUMAN]	9	7
H7BZT7	S-formylglutathione hydrolase (Fragment) OS=Homo sapiens GN=ESD PE=1 SV=1 - [H7BZT7_HUMAN]	9
H7C3I1	Hsc70-interacting protein (Fragment) OS=Homo sapiens GN=ST13 PE=1 SV=1 - [H7C3I1_HUMAN]	9	6	1
O15027	Protein transport protein Sec16A OS=Homo sapiens GN=SEC16A PE=1 SV=3 - [SC16A_HUMAN]	9	4
O95453	Poly(A)-specific ribonuclease PARN OS=Homo sapiens GN=PARN PE=1 SV=1 - [PARN_HUMAN]	9	1
P26639	Threonine--tRNA ligase, cytoplasmic OS=Homo sapiens GN=TARS PE=1 SV=3 - [SYTC_HUMAN]	9	2
P30101	Protein disulfide-isomerase A3 OS=Homo sapiens GN=PDIA3 PE=1 SV=4 - [PDIA3_HUMAN]	9	7
P31153	S-adenosylmethionine synthase isoform type-2 OS=Homo sapiens GN=MAT2A PE=1 SV=1 - [METK2_HUMAN]	9	2
P32119	Peroxiredoxin-2 OS=Homo sapiens GN=PRDX2 PE=1 SV=5 - [PRDX2_HUMAN]	9	6	2
P78527	DNA-dependent protein kinase catalytic subunit OS=Homo sapiens GN=PRKDC PE=1 SV=3 - [PRKDC_HUMAN]	9	9
Q01082	Spectrin beta chain, non-erythrocytic 1 OS=Homo sapiens GN=SPTBN1 PE=1 SV=2 - [SPTB2_HUMAN]	9	13
Q08188	Protein-glutamine gamma-glutamyltransferase E OS=Homo sapiens GN=TGM3 PE=1 SV=4 - [TGM3_HUMAN]	9	11	1
Q13155	Aminoacyl tRNA synthase complex-interacting multifunctional protein 2 OS=Homo sapiens GN=AIMP2 PE=1 SV=2 - [AIMP2_HUMAN]	9	1
Q15393	Splicing factor 3B subunit 3 OS=Homo sapiens GN=SF3B3 PE=1 SV=4 - [SF3B3_HUMAN]	9	16
Q16566	Calcium/calmodulin-dependent protein kinase type IV OS=Homo sapiens GN=CAMK4 PE=1 SV=1 - [KCC4_HUMAN]	9	4
Q5JR95	40S ribosomal protein S8 OS=Homo sapiens GN=RPS8 PE=1 SV=1 - [Q5JR95_HUMAN]	9	9
Q5QPM7	Proteasome inhibitor PI31 subunit OS=Homo sapiens GN=PSMF1 PE=1 SV=2 - [Q5QPM7_HUMAN]	9	6
Q6MZZ4	ETS-related transcription factor Elf-1 OS=Homo sapiens GN=DKFZp686H0575 PE=1 SV=1 - [Q6MZZ4_HUMAN]	9	3
Q9BV44	THUMP domain-containing protein 3 OS=Homo sapiens GN=THUMPD3 PE=1 SV=1 - [THUM3_HUMAN]	9	5
Q9NSD9	Phenylalanine--tRNA ligase beta subunit OS=Homo sapiens GN=FARSB PE=1 SV=3 - [SYFB_HUMAN]	9	9
Q9NVG8	TBC1 domain family member 13 OS=Homo sapiens GN=TBC1D13 PE=1 SV=3 - [TBC13_HUMAN]	9	6
Q9UL15	BAG family molecular chaperone regulator 5 OS=Homo sapiens GN=BAG5 PE=1 SV=1 - [BAG5_HUMAN]	9	2
Q9Y4W2	Ribosomal biogenesis protein LAS1L OS=Homo sapiens GN=LAS1L PE=1 SV=2 - [LAS1L_HUMAN]	9	4
A0A087WX29	TAR DNA-binding protein 43 (Fragment) OS=Homo sapiens GN=TARDBP PE=1 SV=1 - [A0A087WX29_HUMAN]	8
A0A0A0MRN5	Opioid growth factor receptor OS=Homo sapiens GN=OGFR PE=1 SV=1 - [A0A0A0MRN5_HUMAN]	8	4
A0A5B9	T-cell receptor beta-2 chain C region OS=Homo sapiens GN=TRBC2 PE=1 SV=1 - [TRBC2_HUMAN]	8
B1ANR0	Polyadenylate-binding protein OS=Homo sapiens GN=PABPC4 PE=1 SV=1 - [B1ANR0_HUMAN]	8
E9PK01	Elongation factor 1-delta (Fragment) OS=Homo sapiens GN=EEF1D PE=1 SV=1 - [E9PK01_HUMAN]	8
F5H6X6	Neutral alpha-glucosidase AB OS=Homo sapiens GN=GANAB PE=1 SV=1 - [F5H6X6_HUMAN]	8	9
G3V529	ATP-dependent RNA helicase DDX24 OS=Homo sapiens GN=DDX24 PE=1 SV=1 - [G3V529_HUMAN]	8	3
H0YKS4	Annexin (Fragment) OS=Homo sapiens GN=ANXA2 PE=1 SV=1 - [H0YKS4_HUMAN]	8
H7C3A1	Serrate RNA effector molecule homolog (Fragment) OS=Homo sapiens GN=SRRT PE=1 SV=1 - [H7C3A1_HUMAN]	8
O00154	Cytosolic acyl coenzyme A thioester hydrolase OS=Homo sapiens GN=ACOT7 PE=1 SV=3 - [BACH_HUMAN]	8	4
O60216	Double-strand-break repair protein rad21 homolog OS=Homo sapiens GN=RAD21 PE=1 SV=2 - [RAD21_HUMAN]	8	6
O60502	Protein O-GlcNAcase OS=Homo sapiens GN=MGEA5 PE=1 SV=2 - [OGA_HUMAN]	8	4
O94776	Metastasis-associated protein MTA2 OS=Homo sapiens GN=MTA2 PE=1 SV=1 - [MTA2_HUMAN]	8	6
P27694	Replication protein A 70 kDa DNA-binding subunit OS=Homo sapiens GN=RPA1 PE=1 SV=2 - [RFA1_HUMAN]	8	7
P49792	E3 SUMO-protein ligase RanBP2 OS=Homo sapiens GN=RANBP2 PE=1 SV=2 - [RBP2_HUMAN]	8	7
P50570	Dynamin-2 OS=Homo sapiens GN=DNM2 PE=1 SV=2 - [DYN2_HUMAN]	8	3
Q14008	Cytoskeleton-associated protein 5 OS=Homo sapiens GN=CKAP5 PE=1 SV=3 - [CKAP5_HUMAN]	8	4
Q15029	116 kDa U5 small nuclear ribonucleoprotein component OS=Homo sapiens GN=EFTUD2 PE=1 SV=1 - [U5S1_HUMAN]	8	6
Q15052	Rho guanine nucleotide exchange factor 6 OS=Homo sapiens GN=ARHGEF6 PE=1 SV=2 - [ARHG6_HUMAN]	8	12
Q15645	Pachytene checkpoint protein 2 homolog OS=Homo sapiens GN=TRIP13 PE=1 SV=2 - [PCH2_HUMAN]	8	5
Q16531	DNA damage-binding protein 1 OS=Homo sapiens GN=DDB1 PE=1 SV=1 - [DDB1_HUMAN]	8	10
Q2TAM5	RELA protein OS=Homo sapiens GN=RELA PE=1 SV=1 - [Q2TAM5_HUMAN]	8	3
Q5UIP0	Telomere-associated protein RIF1 OS=Homo sapiens GN=RIF1 PE=1 SV=2 - [RIF1_HUMAN]	8	2
Q7Z2W4	Zinc finger CCCH-type antiviral protein 1 OS=Homo sapiens GN=ZC3HAV1 PE=1 SV=3 - [ZCCHV_HUMAN]	8	1
Q7Z434	Mitochondrial antiviral-signaling protein OS=Homo sapiens GN=MAVS PE=1 SV=2 - [MAVS_HUMAN]	8	10
Q7Z6Z7	E3 ubiquitin-protein ligase HUWE1 OS=Homo sapiens GN=HUWE1 PE=1 SV=3 - [HUWE1_HUMAN]	8	4
Q8N806	Putative E3 ubiquitin-protein ligase UBR7 OS=Homo sapiens GN=UBR7 PE=1 SV=2 - [UBR7_HUMAN]	8	9
Q92973	Transportin-1 OS=Homo sapiens GN=TNPO1 PE=1 SV=2 - [TNPO1_HUMAN]	8	6
Q96RE7	Nucleus accumbens-associated protein 1 OS=Homo sapiens GN=NACC1 PE=1 SV=1 - [NACC1_HUMAN]	8	12
Q9C0B1	Alpha-ketoglutarate-dependent dioxygenase FTO OS=Homo sapiens GN=FTO PE=1 SV=3 - [FTO_HUMAN]	8
Q9NR30	Nucleolar RNA helicase 2 OS=Homo sapiens GN=DDX21 PE=1 SV=5 - [DDX21_HUMAN]	8	4
Q9UMS4	Pre-mRNA-processing factor 19 OS=Homo sapiens GN=PRPF19 PE=1 SV=1 - [PRP19_HUMAN]	8	9
Q9UNM6	26S proteasome non-ATPase regulatory subunit 13 OS=Homo sapiens GN=PSMD13 PE=1 SV=2 - [PSD13_HUMAN]	8	3
Q9Y4E8	Ubiquitin carboxyl-terminal hydrolase 15 OS=Homo sapiens GN=USP15 PE=1 SV=3 - [UBP15_HUMAN]	8	5
Q9Y5Y2	Cytosolic Fe-S cluster assembly factor NUBP2 OS=Homo sapiens GN=NUBP2 PE=1 SV=1 - [NUBP2_HUMAN]	8
A0A087WV29	N-acetyltransferase 10 OS=Homo sapiens GN=NAT10 PE=1 SV=1 - [A0A087WV29_HUMAN]	7	3
A0A0A0MSI0	Peroxiredoxin-1 (Fragment) OS=Homo sapiens GN=PRDX1 PE=1 SV=1 - [A0A0A0MSI0_HUMAN]	7	12
A0A0J9YVR6	Poly(U)-binding-splicing factor PUF60 (Fragment) OS=Homo sapiens GN=PUF60 PE=1 SV=1 - [A0A0J9YVR6_HUMAN]	7	4
C9JA93	TBC1 domain family member 15 (Fragment) OS=Homo sapiens GN=TBC1D15 PE=1 SV=1 - [C9JA93_HUMAN]	7	6
E9PBD8	Lymphocyte-specific protein 1 (Fragment) OS=Homo sapiens GN=LSP1 PE=1 SV=1 - [E9PBD8_HUMAN]	7	1
E9PIE4	Mitochondrial carrier homolog 2 (Fragment) OS=Homo sapiens GN=MTCH2 PE=1 SV=6 - [E9PIE4_HUMAN]	7	3
G3V1A4	Cofilin 1 (Non-muscle), isoform CRA_a OS=Homo sapiens GN=CFL1 PE=1 SV=1 - [G3V1A4_HUMAN]	7	12
G3V1C3	Apoptosis inhibitor 5 OS=Homo sapiens GN=API5 PE=1 SV=1 - [G3V1C3_HUMAN]	7	2
O94826	Mitochondrial import receptor subunit TOM70 OS=Homo sapiens GN=TOMM70A PE=1 SV=1 - [TOM70_HUMAN]	7	4
O95292	Vesicle-associated membrane protein-associated protein B/C OS=Homo sapiens GN=VAPB PE=1 SV=3 - [VAPB_HUMAN]	7	5
O95373	Importin-7 OS=Homo sapiens GN=IPO7 PE=1 SV=1 - [IPO7_HUMAN]	7	4
O95758	Polypyrimidine tract-binding protein 3 OS=Homo sapiens GN=PTBP3 PE=1 SV=2 - [PTBP3_HUMAN]	7	6
P01040	Cystatin-A OS=Homo sapiens GN=CSTA PE=1 SV=1 - [CYTA_HUMAN]	7	6	4
P08754	Guanine nucleotide-binding protein G(k) subunit alpha OS=Homo sapiens GN=GNAI3 PE=1 SV=3 - [GNAI3_HUMAN]	7	3
P09543	2',3'-cyclic-nucleotide 3'-phosphodiesterase OS=Homo sapiens GN=CNP PE=1 SV=2 - [CN37_HUMAN]	7
P16403	Histone H1.2 OS=Homo sapiens GN=HIST1H1C PE=1 SV=2 - [H12_HUMAN]	7	6	3
P35249	Replication factor C subunit 4 OS=Homo sapiens GN=RFC4 PE=1 SV=2 - [RFC4_HUMAN]	7	7
P40939	Trifunctional enzyme subunit alpha, mitochondrial OS=Homo sapiens GN=HADHA PE=1 SV=2 - [ECHA_HUMAN]	7	2
P41091	Eukaryotic translation initiation factor 2 subunit 3 OS=Homo sapiens GN=EIF2S3 PE=1 SV=3 - [IF2G_HUMAN]	7	5
P42566	Epidermal growth factor receptor substrate 15 OS=Homo sapiens GN=EPS15 PE=1 SV=2 - [EPS15_HUMAN]	7
P47897	Glutamine--tRNA ligase OS=Homo sapiens GN=QARS PE=1 SV=1 - [SYQ_HUMAN]	7
P56537	Eukaryotic translation initiation factor 6 OS=Homo sapiens GN=EIF6 PE=1 SV=1 - [IF6_HUMAN]	7	2
Q01826	DNA-binding protein SATB1 OS=Homo sapiens GN=SATB1 PE=1 SV=1 - [SATB1_HUMAN]	7	2
Q07021	Complement component 1 Q subcomponent-binding protein, mitochondrial OS=Homo sapiens GN=C1QBP PE=1 SV=1 - [C1QBP_HUMAN]	7	11
Q13469	Nuclear factor of activated T-cells, cytoplasmic 2 OS=Homo sapiens GN=NFATC2 PE=1 SV=2 - [NFAC2_HUMAN]	7	3
Q14532	Keratin, type I cuticular Ha2 OS=Homo sapiens GN=KRT32 PE=2 SV=3 - [K1H2_HUMAN]	7
Q15691	Microtubule-associated protein RP/EB family member 1 OS=Homo sapiens GN=MAPRE1 PE=1 SV=3 - [MARE1_HUMAN]	7	6
Q5TBB1	Ribonuclease H2 subunit B OS=Homo sapiens GN=RNASEH2B PE=1 SV=1 - [RNH2B_HUMAN]	7	2
Q8IY67	Ribonucleoprotein PTB-binding 1 OS=Homo sapiens GN=RAVER1 PE=1 SV=1 - [RAVR1_HUMAN]	7	2
Q8IYB7	DIS3-like exonuclease 2 OS=Homo sapiens GN=DIS3L2 PE=1 SV=4 - [DI3L2_HUMAN]	7	3
Q92616	Translational activator GCN1 OS=Homo sapiens GN=GCN1L1 PE=1 SV=6 - [GCN1L_HUMAN]	7	1
Q96CW5	Gamma-tubulin complex component 3 OS=Homo sapiens GN=TUBGCP3 PE=1 SV=2 - [GCP3_HUMAN]	7
Q96QK1	Vacuolar protein sorting-associated protein 35 OS=Homo sapiens GN=VPS35 PE=1 SV=2 - [VPS35_HUMAN]	7	2
Q99567	Nuclear pore complex protein Nup88 OS=Homo sapiens GN=NUP88 PE=1 SV=2 - [NUP88_HUMAN]	7	3
Q9NY33	Dipeptidyl peptidase 3 OS=Homo sapiens GN=DPP3 PE=1 SV=2 - [DPP3_HUMAN]	7	10
Q9UIA9	Exportin-7 OS=Homo sapiens GN=XPO7 PE=1 SV=3 - [XPO7_HUMAN]	7	4
A0A087WV66	Antigen KI-67 OS=Homo sapiens GN=MKI67 PE=1 SV=1 - [A0A087WV66_HUMAN]	6	3
A0A087X0I9	Protein kinase C OS=Homo sapiens GN=PRKCQ PE=1 SV=1 - [A0A087X0I9_HUMAN]	6
A0A087X2G1	ATP-dependent RNA helicase DDX1 OS=Homo sapiens GN=DDX1 PE=1 SV=1 - [A0A087X2G1_HUMAN]	6	4
A0A0A0MR62	Formin-like protein 1 OS=Homo sapiens GN=FMNL1 PE=1 SV=1 - [A0A0A0MR62_HUMAN]	6
A0A0A0MTH9	TATA-binding protein-associated factor 172 OS=Homo sapiens GN=BTAF1 PE=1 SV=1 - [A0A0A0MTH9_HUMAN]	6	3
A0A0G2JHC2	Phostensin OS=Homo sapiens GN=PPP1R18 PE=1 SV=1 - [A0A0G2JHC2_HUMAN]	6	2
A0A0G2JL47	Large proline-rich protein BAG6 OS=Homo sapiens GN=BAG6 PE=1 SV=1 - [A0A0G2JL47_HUMAN]	6	3
B4DKY1	Cysteine--tRNA ligase, cytoplasmic OS=Homo sapiens GN=CARS PE=1 SV=1 - [B4DKY1_HUMAN]	6	6
B4DSN5	Tyrosine-protein phosphatase non-receptor type OS=Homo sapiens GN=PTPN1 PE=1 SV=1 - [B4DSN5_HUMAN]	6	3
B7ZL14	FNBP1 protein OS=Homo sapiens GN=FNBP1 PE=1 SV=1 - [B7ZL14_HUMAN]	6	6
C9J9K3	40S ribosomal protein SA (Fragment) OS=Homo sapiens GN=RPSA PE=1 SV=6 - [C9J9K3_HUMAN]	6	8
E9PKD5	26S protease regulatory subunit 6A (Fragment) OS=Homo sapiens GN=PSMC3 PE=1 SV=2 - [E9PKD5_HUMAN]	6
F5GYN4	Ubiquitin thioesterase OTUB1 OS=Homo sapiens GN=OTUB1 PE=1 SV=1 - [F5GYN4_HUMAN]	6	8
F5GZS6	4F2 cell-surface antigen heavy chain OS=Homo sapiens GN=SLC3A2 PE=1 SV=1 - [F5GZS6_HUMAN]	6	3
F8WF49	Disks large-associated protein 4 OS=Homo sapiens GN=DLGAP4 PE=1 SV=1 - [F8WF49_HUMAN]	6	1
G3V153	Caprin-1 OS=Homo sapiens GN=CAPRIN1 PE=1 SV=1 - [G3V153_HUMAN]	6
G3XAJ6	Raft-linking protein, isoform CRA_c OS=Homo sapiens GN=RFTN1 PE=1 SV=1 - [G3XAJ6_HUMAN]	6
H0YA93	NEDD4-binding protein 2 (Fragment) OS=Homo sapiens GN=N4BP2 PE=1 SV=1 - [H0YA93_HUMAN]	6	2
H0YJS4	Eukaryotic translation initiation factor 2 subunit 1 (Fragment) OS=Homo sapiens GN=EIF2S1 PE=1 SV=1 - [H0YJS4_HUMAN]	6	2
K7ENG2	Splicing factor U2AF 65 kDa subunit OS=Homo sapiens GN=U2AF2 PE=1 SV=1 - [K7ENG2_HUMAN]	6	2
M0QZS6	SUMO-activating enzyme subunit 1 OS=Homo sapiens GN=SAE1 PE=1 SV=1 - [M0QZS6_HUMAN]	6
O00231	26S proteasome non-ATPase regulatory subunit 11 OS=Homo sapiens GN=PSMD11 PE=1 SV=3 - [PSD11_HUMAN]	6
O60256	Phosphoribosyl pyrophosphate synthase-associated protein 2 OS=Homo sapiens GN=PRPSAP2 PE=1 SV=1 - [KPRB_HUMAN]	6
O75643	U5 small nuclear ribonucleoprotein 200 kDa helicase OS=Homo sapiens GN=SNRNP200 PE=1 SV=2 - [U520_HUMAN]	6	3
O76003	Glutaredoxin-3 OS=Homo sapiens GN=GLRX3 PE=1 SV=2 - [GLRX3_HUMAN]	6	2
O95861	3'(2'),5'-bisphosphate nucleotidase 1 OS=Homo sapiens GN=BPNT1 PE=1 SV=1 - [BPNT1_HUMAN]	6	4
P14921	Protein C-ets-1 OS=Homo sapiens GN=ETS1 PE=1 SV=1 - [ETS1_HUMAN]	6	5
P16615	Sarcoplasmic/endoplasmic reticulum calcium ATPase 2 OS=Homo sapiens GN=ATP2A2 PE=1 SV=1 - [AT2A2_HUMAN]	6	6
P28066	Proteasome subunit alpha type-5 OS=Homo sapiens GN=PSMA5 PE=1 SV=3 - [PSA5_HUMAN]	6	3
P30520	Adenylosuccinate synthetase isozyme 2 OS=Homo sapiens GN=ADSS PE=1 SV=3 - [PURA2_HUMAN]	6	1
P40938	Replication factor C subunit 3 OS=Homo sapiens GN=RFC3 PE=1 SV=2 - [RFC3_HUMAN]	6	3
P46940	Ras GTPase-activating-like protein IQGAP1 OS=Homo sapiens GN=IQGAP1 PE=1 SV=1 - [IQGA1_HUMAN]	6	12
P49841	Glycogen synthase kinase-3 beta OS=Homo sapiens GN=GSK3B PE=1 SV=2 - [GSK3B_HUMAN]	6	1
P50995	Annexin A11 OS=Homo sapiens GN=ANXA11 PE=1 SV=1 - [ANX11_HUMAN]	6	2
P52701	DNA mismatch repair protein Msh6 OS=Homo sapiens GN=MSH6 PE=1 SV=2 - [MSH6_HUMAN]	6
P54577	Tyrosine--tRNA ligase, cytoplasmic OS=Homo sapiens GN=YARS PE=1 SV=4 - [SYYC_HUMAN]	6	7
P81605	Dermcidin OS=Homo sapiens GN=DCD PE=1 SV=2 - [DCD_HUMAN]	6	6	8
Q12874	Splicing factor 3A subunit 3 OS=Homo sapiens GN=SF3A3 PE=1 SV=1 - [SF3A3_HUMAN]	6	5
Q13045	Protein flightless-1 homolog OS=Homo sapiens GN=FLII PE=1 SV=2 - [FLII_HUMAN]	6	6
Q13561	Dynactin subunit 2 OS=Homo sapiens GN=DCTN2 PE=1 SV=4 - [DCTN2_HUMAN]	6
Q15398	Disks large-associated protein 5 OS=Homo sapiens GN=DLGAP5 PE=1 SV=2 - [DLGP5_HUMAN]	6	3
Q5SZR4	Tudor and KH domain containing, isoform CRA_a OS=Homo sapiens GN=TDRKH PE=1 SV=1 - [Q5SZR4_HUMAN]	6	2
Q5T7C4	High mobility group protein B1 OS=Homo sapiens GN=HMGB1 PE=1 SV=1 - [Q5T7C4_HUMAN]	6	5
Q86UV5	Ubiquitin carboxyl-terminal hydrolase 48 OS=Homo sapiens GN=USP48 PE=1 SV=1 - [UBP48_HUMAN]	6	2
Q8N1G4	Leucine-rich repeat-containing protein 47 OS=Homo sapiens GN=LRRC47 PE=1 SV=1 - [LRC47_HUMAN]	6	2
Q8NCF5	NFATC2-interacting protein OS=Homo sapiens GN=NFATC2IP PE=1 SV=1 - [NF2IP_HUMAN]	6
Q8NDX1	PH and SEC7 domain-containing protein 4 OS=Homo sapiens GN=PSD4 PE=1 SV=2 - [PSD4_HUMAN]	6	3
Q8WWM7	Ataxin-2-like protein OS=Homo sapiens GN=ATXN2L PE=1 SV=2 - [ATX2L_HUMAN]	6
Q92688	Acidic leucine-rich nuclear phosphoprotein 32 family member B OS=Homo sapiens GN=ANP32B PE=1 SV=1 - [AN32B_HUMAN]	6	2
Q92974	Rho guanine nucleotide exchange factor 2 OS=Homo sapiens GN=ARHGEF2 PE=1 SV=4 - [ARHG2_HUMAN]	6	3
Q9BTE6	Alanyl-tRNA editing protein Aarsd1 OS=Homo sapiens GN=AARSD1 PE=1 SV=2 - [AASD1_HUMAN]	6
Q9H3U1	Protein unc-45 homolog A OS=Homo sapiens GN=UNC45A PE=1 SV=1 - [UN45A_HUMAN]	6	5
Q9H9A7	RecQ-mediated genome instability protein 1 OS=Homo sapiens GN=RMI1 PE=1 SV=3 - [RMI1_HUMAN]	6
Q9Y2D5	A-kinase anchor protein 2 OS=Homo sapiens GN=AKAP2 PE=1 SV=3 - [AKAP2_HUMAN]	6	4
A0A087WSW7	Helicase, lymphoid-specific, isoform CRA_d OS=Homo sapiens GN=HELLS PE=1 SV=1 - [A0A087WSW7_HUMAN]	5
A0A087WUL2	Proteasome subunit beta type-3 (Fragment) OS=Homo sapiens GN=PSMB3 PE=1 SV=1 - [A0A087WUL2_HUMAN]	5
A0A087WVC1	ATP-dependent RNA helicase DDX50 OS=Homo sapiens GN=DDX50 PE=1 SV=1 - [A0A087WVC1_HUMAN]	5	3
A0A087X0I4	Coatomer subunit epsilon OS=Homo sapiens GN=COPE PE=1 SV=1 - [A0A087X0I4_HUMAN]	5	2
B1AKQ8	Guanine nucleotide-binding protein G(I)/G(S)/G(T) subunit beta-1 (Fragment) OS=Homo sapiens GN=GNB1 PE=1 SV=6 - [B1AKQ8_HUMAN]	5	2
B4E3S0	Coronin OS=Homo sapiens GN=CORO1C PE=1 SV=1 - [B4E3S0_HUMAN]	5	3
D6R9P3	Heterogeneous nuclear ribonucleoprotein A/B OS=Homo sapiens GN=HNRNPAB PE=1 SV=1 - [D6R9P3_HUMAN]	5	6
D6REB0	Calcium-binding and coiled-coil domain-containing protein 2 (Fragment) OS=Homo sapiens GN=CALCOCO2 PE=1 SV=1 - [D6REB0_HUMAN]	5	2	2
E5RFX4	Lymphokine-activated killer T-cell-originated protein kinase (Fragment) OS=Homo sapiens GN=PBK PE=1 SV=2 - [E5RFX4_HUMAN]	5
E7ESY4	Metastasis-associated protein MTA1 OS=Homo sapiens GN=MTA1 PE=1 SV=1 - [E7ESY4_HUMAN]	5
E9PEX6	Dihydrolipoyl dehydrogenase OS=Homo sapiens GN=DLD PE=1 SV=1 - [E9PEX6_HUMAN]	5	2
E9PMQ6	Heat shock factor protein 1 OS=Homo sapiens GN=HSF1 PE=1 SV=2 - [E9PMQ6_HUMAN]	5	1
F5GWX5	Chromodomain-helicase-DNA-binding protein 4 OS=Homo sapiens GN=CHD4 PE=1 SV=1 - [F5GWX5_HUMAN]	5	9
F5H6T1	ARP2 actin-related protein 2 homolog (Yeast), isoform CRA_d OS=Homo sapiens GN=ACTR2 PE=1 SV=2 - [F5H6T1_HUMAN]	5
F8VR69	60S ribosomal protein L6 (Fragment) OS=Homo sapiens GN=RPL6 PE=1 SV=6 - [F8VR69_HUMAN]	5
F8W8D4	NEDD8-activating enzyme E1 catalytic subunit OS=Homo sapiens GN=UBA3 PE=1 SV=1 - [F8W8D4_HUMAN]	5	1
F8WE65	Peptidyl-prolyl cis-trans isomerase OS=Homo sapiens GN=PPIA PE=1 SV=1 - [F8WE65_HUMAN]	5	4
H0Y4X3	RNA-binding protein 39 (Fragment) OS=Homo sapiens GN=RBM39 PE=1 SV=6 - [H0Y4X3_HUMAN]	5	2
H0Y612	E3 ubiquitin-protein ligase TRIM33 (Fragment) OS=Homo sapiens GN=TRIM33 PE=1 SV=1 - [H0Y612_HUMAN]	5	1
H9KV28	Protein diaphanous homolog 1 OS=Homo sapiens GN=DIAPH1 PE=1 SV=2 - [H9KV28_HUMAN]	5	2
J3KN87	Serine/threonine-protein kinase Chk1 OS=Homo sapiens GN=CHEK1 PE=1 SV=1 - [J3KN87_HUMAN]	5	1
J3QLE5	Small nuclear ribonucleoprotein-associated protein N (Fragment) OS=Homo sapiens GN=SNRPN PE=4 SV=1 - [J3QLE5_HUMAN]	5	2
M0R0P1	rRNA 2'-O-methyltransferase fibrillarin (Fragment) OS=Homo sapiens GN=FBL PE=1 SV=1 - [M0R0P1_HUMAN]	5
M0R0Q7	DNA ligase OS=Homo sapiens GN=LIG1 PE=1 SV=1 - [M0R0Q7_HUMAN]	5
M0R0Y2	Alpha-soluble NSF attachment protein OS=Homo sapiens GN=NAPA PE=1 SV=1 - [M0R0Y2_HUMAN]	5
O14497	AT-rich interactive domain-containing protein 1A OS=Homo sapiens GN=ARID1A PE=1 SV=3 - [ARI1A_HUMAN]	5	5
O75191	Xylulose kinase OS=Homo sapiens GN=XYLB PE=1 SV=3 - [XYLB_HUMAN]	5
O75569	Interferon-inducible double-stranded RNA-dependent protein kinase activator A OS=Homo sapiens GN=PRKRA PE=1 SV=1 - [PRKRA_HUMAN]	5
P06702	Protein S100-A9 OS=Homo sapiens GN=S100A9 PE=1 SV=1 - [S10A9_HUMAN]	5	9	4
P11766	Alcohol dehydrogenase class-3 OS=Homo sapiens GN=ADH5 PE=1 SV=4 - [ADHX_HUMAN]	5	6
P15121	Aldose reductase OS=Homo sapiens GN=AKR1B1 PE=1 SV=3 - [ALDR_HUMAN]	5	5
P22681	E3 ubiquitin-protein ligase CBL OS=Homo sapiens GN=CBL PE=1 SV=2 - [CBL_HUMAN]	5	1
P23381	Tryptophan--tRNA ligase, cytoplasmic OS=Homo sapiens GN=WARS PE=1 SV=2 - [SYWC_HUMAN]	5	3
P25787	Proteasome subunit alpha type-2 OS=Homo sapiens GN=PSMA2 PE=1 SV=2 - [PSA2_HUMAN]	5	3
P30048	Thioredoxin-dependent peroxide reductase, mitochondrial OS=Homo sapiens GN=PRDX3 PE=1 SV=3 - [PRDX3_HUMAN]	5	6
P31942	Heterogeneous nuclear ribonucleoprotein H3 OS=Homo sapiens GN=HNRNPH3 PE=1 SV=2 - [HNRH3_HUMAN]	5	1
P35250	Replication factor C subunit 2 OS=Homo sapiens GN=RFC2 PE=1 SV=3 - [RFC2_HUMAN]	5
P35580	Myosin-10 OS=Homo sapiens GN=MYH10 PE=1 SV=3 - [MYH10_HUMAN]	5
P35659	Protein DEK OS=Homo sapiens GN=DEK PE=1 SV=1 - [DEK_HUMAN]	5
P39023	60S ribosomal protein L3 OS=Homo sapiens GN=RPL3 PE=1 SV=2 - [RL3_HUMAN]	5
P39748	Flap endonuclease 1 OS=Homo sapiens GN=FEN1 PE=1 SV=1 - [FEN1_HUMAN]	5	6
P40925	Malate dehydrogenase, cytoplasmic OS=Homo sapiens GN=MDH1 PE=1 SV=4 - [MDHC_HUMAN]	5
P43487	Ran-specific GTPase-activating protein OS=Homo sapiens GN=RANBP1 PE=1 SV=1 - [RANG_HUMAN]	5
P49643	DNA primase large subunit OS=Homo sapiens GN=PRIM2 PE=1 SV=2 - [PRI2_HUMAN]	5
P52907	F-actin-capping protein subunit alpha-1 OS=Homo sapiens GN=CAPZA1 PE=1 SV=3 - [CAZA1_HUMAN]	5	6
P55809	Succinyl-CoA:3-ketoacid coenzyme A transferase 1, mitochondrial OS=Homo sapiens GN=OXCT1 PE=1 SV=1 - [SCOT1_HUMAN]	5	2
P57740	Nuclear pore complex protein Nup107 OS=Homo sapiens GN=NUP107 PE=1 SV=1 - [NU107_HUMAN]	5	5
P60228	Eukaryotic translation initiation factor 3 subunit E OS=Homo sapiens GN=EIF3E PE=1 SV=1 - [EIF3E_HUMAN]	5
P60953	Cell division control protein 42 homolog OS=Homo sapiens GN=CDC42 PE=1 SV=2 - [CDC42_HUMAN]	5	1
P63092	Guanine nucleotide-binding protein G(s) subunit alpha isoforms short OS=Homo sapiens GN=GNAS PE=1 SV=1 - [GNAS2_HUMAN]	5	2
Q02790	Peptidyl-prolyl cis-trans isomerase FKBP4 OS=Homo sapiens GN=FKBP4 PE=1 SV=3 - [FKBP4_HUMAN]	5	3
Q06546	GA-binding protein alpha chain OS=Homo sapiens GN=GABPA PE=1 SV=1 - [GABPA_HUMAN]	5	1
Q14258	E3 ubiquitin/ISG15 ligase TRIM25 OS=Homo sapiens GN=TRIM25 PE=1 SV=2 - [TRI25_HUMAN]	5	4
Q15637	Splicing factor 1 OS=Homo sapiens GN=SF1 PE=1 SV=4 - [SF01_HUMAN]	5	2
Q5T6F2	Ubiquitin-associated protein 2 OS=Homo sapiens GN=UBAP2 PE=1 SV=1 - [UBAP2_HUMAN]	5	2
Q5TDH0	Protein DDI1 homolog 2 OS=Homo sapiens GN=DDI2 PE=1 SV=1 - [DDI2_HUMAN]	5	4
Q76I76	Protein phosphatase Slingshot homolog 2 OS=Homo sapiens GN=SSH2 PE=1 SV=1 - [SSH2_HUMAN]	5	7
Q7L1Q6	Basic leucine zipper and W2 domain-containing protein 1 OS=Homo sapiens GN=BZW1 PE=1 SV=1 - [BZW1_HUMAN]	5	3
Q7Z5K2	Wings apart-like protein homolog OS=Homo sapiens GN=WAPL PE=1 SV=1 - [WAPL_HUMAN]	5	4
Q86YZ3	Hornerin OS=Homo sapiens GN=HRNR PE=1 SV=2 - [HORN_HUMAN]	5	13	5
Q8TCG1	Protein CIP2A OS=Homo sapiens GN=KIAA1524 PE=1 SV=2 - [CIP2A_HUMAN]	5	2
Q96G03	Phosphoglucomutase-2 OS=Homo sapiens GN=PGM2 PE=1 SV=4 - [PGM2_HUMAN]	5	2
Q9BXW7	Cat eye syndrome critical region protein 5 OS=Homo sapiens GN=CECR5 PE=1 SV=1 - [CECR5_HUMAN]	5	3
Q9NZB2	Constitutive coactivator of PPAR-gamma-like protein 1 OS=Homo sapiens GN=FAM120A PE=1 SV=2 - [F120A_HUMAN]	5	5
Q9P0L0	Vesicle-associated membrane protein-associated protein A OS=Homo sapiens GN=VAPA PE=1 SV=3 - [VAPA_HUMAN]	5	3
Q9P287	BRCA2 and CDKN1A-interacting protein OS=Homo sapiens GN=BCCIP PE=1 SV=1 - [BCCIP_HUMAN]	5	3
Q9UHB9	Signal recognition particle subunit SRP68 OS=Homo sapiens GN=SRP68 PE=1 SV=2 - [SRP68_HUMAN]	5	6
Q9Y3P8	Signaling threshold-regulating transmembrane adapter 1 OS=Homo sapiens GN=SIT1 PE=1 SV=1 - [SIT1_HUMAN]	5	3
A0A087WW66	26S proteasome non-ATPase regulatory subunit 1 OS=Homo sapiens GN=PSMD1 PE=1 SV=1 - [A0A087WW66_HUMAN]	4	4
A0A087WWR6	Fragile X mental retardation protein 1 (Fragment) OS=Homo sapiens GN=FMR1 PE=1 SV=1 - [A0A087WWR6_HUMAN]	4	1
A0A0D9SF63	F-box-like/WD repeat-containing protein TBL1XR1 OS=Homo sapiens GN=TBL1XR1 PE=1 SV=1 - [A0A0D9SF63_HUMAN]	4
A0A0G2JI36	HLA class I histocompatibility antigen, A-3 alpha chain OS=Homo sapiens GN=HLA-A PE=1 SV=1 - [A0A0G2JI36_HUMAN]	4
B0QZK4	Heterochromatin protein 1-binding protein 3 (Fragment) OS=Homo sapiens GN=HP1BP3 PE=1 SV=1 - [B0QZK4_HUMAN]	4	2
C9JHU6	Lipid droplet-associated hydrolase (Fragment) OS=Homo sapiens GN=LDAH PE=1 SV=1 - [C9JHU6_HUMAN]	4	1
C9JRJ5	LIM domain-containing protein 1 OS=Homo sapiens GN=LIMD1 PE=1 SV=1 - [C9JRJ5_HUMAN]	4	1
E9PJ21	Hypoxia up-regulated protein 1 (Fragment) OS=Homo sapiens GN=HYOU1 PE=1 SV=1 - [E9PJ21_HUMAN]	4	3
F5H8F7	Set1/Ash2 histone methyltransferase complex subunit ASH2 OS=Homo sapiens GN=ASH2L PE=1 SV=1 - [F5H8F7_HUMAN]	4	6
F6T1Q0	2',5'-phosphodiesterase 12 OS=Homo sapiens GN=PDE12 PE=1 SV=1 - [F6T1Q0_HUMAN]	4	4
G5E9A6	Ubiquitin carboxyl-terminal hydrolase 11 OS=Homo sapiens GN=USP11 PE=1 SV=1 - [G5E9A6_HUMAN]	4	6
G8JLG2	Corneodesmosin OS=Homo sapiens GN=CDSN PE=1 SV=1 - [G8JLG2_HUMAN]	4	3	1
H0Y360	AMP deaminase 2 (Fragment) OS=Homo sapiens GN=AMPD2 PE=1 SV=1 - [H0Y360_HUMAN]	4
H0Y5J4	Drebrin-like protein (Fragment) OS=Homo sapiens GN=DBNL PE=1 SV=1 - [H0Y5J4_HUMAN]	4
H0Y8X1	Succinate dehydrogenase [ubiquinone] flavoprotein subunit, mitochondrial (Fragment) OS=Homo sapiens GN=SDHA PE=1 SV=1 - [H0Y8X1_HUMAN]	4	1
H0Y8X6	E3 ubiquitin-protein ligase NEDD4 (Fragment) OS=Homo sapiens GN=NEDD4 PE=1 SV=1 - [H0Y8X6_HUMAN]	4
H0YKT8	Proteasome subunit beta type (Fragment) OS=Homo sapiens GN=PSMA4 PE=1 SV=6 - [H0YKT8_HUMAN]	4
H3BLU7	Aflatoxin B1 aldehyde reductase member 2 (Fragment) OS=Homo sapiens GN=AKR7A2 PE=1 SV=1 - [H3BLU7_HUMAN]	4	1
H7BXY3	Putative ATP-dependent RNA helicase DHX30 OS=Homo sapiens GN=DHX30 PE=1 SV=1 - [H7BXY3_HUMAN]	4
H9KV75	Alpha-actinin-1 OS=Homo sapiens GN=ACTN1 PE=1 SV=1 - [H9KV75_HUMAN]	4	9
J3KQ61	Bromodomain-containing protein 1 (Fragment) OS=Homo sapiens GN=BRD1 PE=1 SV=1 - [J3KQ61_HUMAN]	4	1
J3QR71	Developmentally-regulated GTP-binding protein 2 (Fragment) OS=Homo sapiens GN=DRG2 PE=1 SV=1 - [J3QR71_HUMAN]	4	1
K7EQ02	DAZ-associated protein 1 (Fragment) OS=Homo sapiens GN=DAZAP1 PE=1 SV=2 - [K7EQ02_HUMAN]	4	1
M0QX84	Glomulin (Fragment) OS=Homo sapiens GN=GLMN PE=1 SV=1 - [M0QX84_HUMAN]	4	1
M0QXN5	Nuclear pore glycoprotein p62 OS=Homo sapiens GN=NUP62 PE=1 SV=1 - [M0QXN5_HUMAN]	4	2
O43290	U4/U6.U5 tri-snRNP-associated protein 1 OS=Homo sapiens GN=SART1 PE=1 SV=1 - [SNUT1_HUMAN]	4	4
O60566	Mitotic checkpoint serine/threonine-protein kinase BUB1 beta OS=Homo sapiens GN=BUB1B PE=1 SV=3 - [BUB1B_HUMAN]	4
O60784	Target of Myb protein 1 OS=Homo sapiens GN=TOM1 PE=1 SV=2 - [TOM1_HUMAN]	4	4
O75113	NEDD4-binding protein 1 OS=Homo sapiens GN=N4BP1 PE=1 SV=4 - [N4BP1_HUMAN]	4	3
O75362	Zinc finger protein 217 OS=Homo sapiens GN=ZNF217 PE=1 SV=1 - [ZN217_HUMAN]	4
O75439	Mitochondrial-processing peptidase subunit beta OS=Homo sapiens GN=PMPCB PE=1 SV=2 - [MPPB_HUMAN]	4	1
O94900	Thymocyte selection-associated high mobility group box protein TOX OS=Homo sapiens GN=TOX PE=2 SV=3 - [TOX_HUMAN]	4	4
O95671	N-acetylserotonin O-methyltransferase-like protein OS=Homo sapiens GN=ASMTL PE=1 SV=3 - [ASML_HUMAN]	4	4
O95801	Tetratricopeptide repeat protein 4 OS=Homo sapiens GN=TTC4 PE=1 SV=3 - [TTC4_HUMAN]	4	1
P05109	Protein S100-A8 OS=Homo sapiens GN=S100A8 PE=1 SV=1 - [S10A8_HUMAN]	4	8	1
P07954	Fumarate hydratase, mitochondrial OS=Homo sapiens GN=FH PE=1 SV=3 - [FUMH_HUMAN]	4	4
P13798	Acylamino-acid-releasing enzyme OS=Homo sapiens GN=APEH PE=1 SV=4 - [ACPH_HUMAN]	4	5
P19525	Interferon-induced, double-stranded RNA-activated protein kinase OS=Homo sapiens GN=EIF2AK2 PE=1 SV=2 - [E2AK2_HUMAN]	4	2
P19623	Spermidine synthase OS=Homo sapiens GN=SRM PE=1 SV=1 - [SPEE_HUMAN]	4
P26640	Valine--tRNA ligase OS=Homo sapiens GN=VARS PE=1 SV=4 - [SYVC_HUMAN]	4	6
P31689	DnaJ homolog subfamily A member 1 OS=Homo sapiens GN=DNAJA1 PE=1 SV=2 - [DNJA1_HUMAN]	4	1
P35606	Coatomer subunit beta' OS=Homo sapiens GN=COPB2 PE=1 SV=2 - [COPB2_HUMAN]	4
P41240	Tyrosine-protein kinase CSK OS=Homo sapiens GN=CSK PE=1 SV=1 - [CSK_HUMAN]	4
P43686	26S protease regulatory subunit 6B OS=Homo sapiens GN=PSMC4 PE=1 SV=2 - [PRS6B_HUMAN]	4	3
P60900	Proteasome subunit alpha type-6 OS=Homo sapiens GN=PSMA6 PE=1 SV=1 - [PSA6_HUMAN]	4
P62714	Serine/threonine-protein phosphatase 2A catalytic subunit beta isoform OS=Homo sapiens GN=PPP2CB PE=1 SV=1 - [PP2AB_HUMAN]	4	6
Q08554	Desmocollin-1 OS=Homo sapiens GN=DSC1 PE=1 SV=2 - [DSC1_HUMAN]	4	7	5
Q14683	Structural maintenance of chromosomes protein 1A OS=Homo sapiens GN=SMC1A PE=1 SV=2 - [SMC1A_HUMAN]	4
Q15046	Lysine--tRNA ligase OS=Homo sapiens GN=KARS PE=1 SV=3 - [SYK_HUMAN]	4
Q5D862	Filaggrin-2 OS=Homo sapiens GN=FLG2 PE=1 SV=1 - [FILA2_HUMAN]	4	9	8
Q5EBM0	UMP-CMP kinase 2, mitochondrial OS=Homo sapiens GN=CMPK2 PE=1 SV=3 - [CMPK2_HUMAN]	4
Q5TFE4	5'-nucleotidase domain-containing protein 1 OS=Homo sapiens GN=NT5DC1 PE=1 SV=1 - [NT5D1_HUMAN]	4	2
Q5W0V3	Protein FAM160B1 OS=Homo sapiens GN=FAM160B1 PE=1 SV=1 - [F16B1_HUMAN]	4	2
Q86TB9	Protein PAT1 homolog 1 OS=Homo sapiens GN=PATL1 PE=1 SV=2 - [PATL1_HUMAN]	4	2
Q86UX7	Fermitin family homolog 3 OS=Homo sapiens GN=FERMT3 PE=1 SV=1 - [URP2_HUMAN]	4	2
Q86X55	Histone-arginine methyltransferase CARM1 OS=Homo sapiens GN=CARM1 PE=1 SV=3 - [CARM1_HUMAN]	4
Q8IWX8	Calcium homeostasis endoplasmic reticulum protein OS=Homo sapiens GN=CHERP PE=1 SV=3 - [CHERP_HUMAN]	4	3
Q8NG31	Protein CASC5 OS=Homo sapiens GN=CASC5 PE=1 SV=3 - [CASC5_HUMAN]	4
Q8TB52	F-box only protein 30 OS=Homo sapiens GN=FBXO30 PE=1 SV=3 - [FBX30_HUMAN]	4	1
Q8TEX9	Importin-4 OS=Homo sapiens GN=IPO4 PE=1 SV=2 - [IPO4_HUMAN]	4
Q8WYJ6	Septin-1 OS=Homo sapiens GN=SEPT1 PE=1 SV=2 - [SEPT1_HUMAN]	4	3
Q8WZA9	Immunity-related GTPase family Q protein OS=Homo sapiens GN=IRGQ PE=1 SV=1 - [IRGQ_HUMAN]	4	4
Q92600	Cell differentiation protein RCD1 homolog OS=Homo sapiens GN=RQCD1 PE=1 SV=1 - [RCD1_HUMAN]	4	1
Q96B26	Exosome complex component RRP43 OS=Homo sapiens GN=EXOSC8 PE=1 SV=1 - [EXOS8_HUMAN]	4	1
Q96GX9	Methylthioribulose-1-phosphate dehydratase OS=Homo sapiens GN=APIP PE=1 SV=1 - [MTNB_HUMAN]	4	2
Q96P63	Serpin B12 OS=Homo sapiens GN=SERPINB12 PE=1 SV=1 - [SPB12_HUMAN]	4	7
Q96T88	E3 ubiquitin-protein ligase UHRF1 OS=Homo sapiens GN=UHRF1 PE=1 SV=1 - [UHRF1_HUMAN]	4
Q99798	Aconitate hydratase, mitochondrial OS=Homo sapiens GN=ACO2 PE=1 SV=2 - [ACON_HUMAN]	4	5
Q9BTY7	Protein HGH1 homolog OS=Homo sapiens GN=HGH1 PE=1 SV=1 - [HGH1_HUMAN]	4	2
Q9BV86	N-terminal Xaa-Pro-Lys N-methyltransferase 1 OS=Homo sapiens GN=NTMT1 PE=1 SV=3 - [NTM1A_HUMAN]	4
Q9BWF3	RNA-binding protein 4 OS=Homo sapiens GN=RBM4 PE=1 SV=1 - [RBM4_HUMAN]	4	3
Q9C0F1	Centrosomal protein of 44 kDa OS=Homo sapiens GN=CEP44 PE=1 SV=2 - [CEP44_HUMAN]	4	1
Q9H814	Phosphorylated adapter RNA export protein OS=Homo sapiens GN=PHAX PE=1 SV=1 - [PHAX_HUMAN]	4	1
Q9NQ88	Fructose-2,6-bisphosphatase TIGAR OS=Homo sapiens GN=TIGAR PE=1 SV=1 - [TIGAR_HUMAN]	4	1
Q9NZL9	Methionine adenosyltransferase 2 subunit beta OS=Homo sapiens GN=MAT2B PE=1 SV=1 - [MAT2B_HUMAN]	4	3
Q9UHI6	Probable ATP-dependent RNA helicase DDX20 OS=Homo sapiens GN=DDX20 PE=1 SV=2 - [DDX20_HUMAN]	4	2
Q9Y262	Eukaryotic translation initiation factor 3 subunit L OS=Homo sapiens GN=EIF3L PE=1 SV=1 - [EIF3L_HUMAN]	4	5
Q9Y5A7	NEDD8 ultimate buster 1 OS=Homo sapiens GN=NUB1 PE=1 SV=2 - [NUB1_HUMAN]	4
A0A0A0MRA0	DNA-binding protein Ikaros OS=Homo sapiens GN=IKZF1 PE=1 SV=1 - [A0A0A0MRA0_HUMAN]	3	1
B1APR7	Eyes absent homolog OS=Homo sapiens GN=EYA3 PE=1 SV=1 - [B1APR7_HUMAN]	3
B3KXD6	Pescadillo homolog OS=Homo sapiens GN=PES1 PE=1 SV=1 - [B3KXD6_HUMAN]	3
B4DXZ6	Fragile X mental retardation syndrome-related protein 1 OS=Homo sapiens GN=FXR1 PE=1 SV=1 - [B4DXZ6_HUMAN]	3	4
B5MCX3	Septin-2 OS=Homo sapiens GN=SEPT2 PE=1 SV=1 - [B5MCX3_HUMAN]	3
B8ZZB2	Type I inositol 3,4-bisphosphate 4-phosphatase OS=Homo sapiens GN=INPP4A PE=1 SV=1 - [B8ZZB2_HUMAN]	3	2
C9J168	Phosphoribosyl pyrophosphate synthase-associated protein 1 (Fragment) OS=Homo sapiens GN=PRPSAP1 PE=1 SV=1 - [C9J168_HUMAN]	3
C9J1E2	Aspartyl aminopeptidase (Fragment) OS=Homo sapiens GN=DNPEP PE=1 SV=7 - [C9J1E2_HUMAN]	3
C9J3F6	TBC1 domain family member 5 OS=Homo sapiens GN=TBC1D5 PE=1 SV=1 - [C9J3F6_HUMAN]	3	2
C9J8Q5	Succinate-semialdehyde dehydrogenase, mitochondrial OS=Homo sapiens GN=ALDH5A1 PE=1 SV=1 - [C9J8Q5_HUMAN]	3	1
C9JA69	HMG box transcription factor BBX OS=Homo sapiens GN=BBX PE=1 SV=1 - [C9JA69_HUMAN]	3
C9JE55	Ubiquitin-like modifier-activating enzyme ATG7 (Fragment) OS=Homo sapiens GN=ATG7 PE=1 SV=1 - [C9JE55_HUMAN]	3	1
C9JEV0	Zinc-alpha-2-glycoprotein OS=Homo sapiens GN=AZGP1 PE=1 SV=1 - [C9JEV0_HUMAN]	3		3
C9JHC7	DNA polymerase delta subunit 2 (Fragment) OS=Homo sapiens GN=POLD2 PE=1 SV=1 - [C9JHC7_HUMAN]	3
C9JIG9	Serine/threonine-protein kinase OSR1 OS=Homo sapiens GN=OXSR1 PE=1 SV=1 - [C9JIG9_HUMAN]	3
C9JZ20	Prohibitin (Fragment) OS=Homo sapiens GN=PHB PE=1 SV=1 - [C9JZ20_HUMAN]	3
D6RCB3	Eukaryotic peptide chain release factor subunit 1 OS=Homo sapiens GN=ETF1 PE=1 SV=1 - [D6RCB3_HUMAN]	3
D6RCP9	Deoxycytidine kinase OS=Homo sapiens GN=DCK PE=1 SV=1 - [D6RCP9_HUMAN]	3
D6RD63	COP9 signalosome complex subunit 4 (Fragment) OS=Homo sapiens GN=COPS4 PE=1 SV=1 - [D6RD63_HUMAN]	3	2
E5RGF9	Protein FAM114A2 (Fragment) OS=Homo sapiens GN=FAM114A2 PE=1 SV=1 - [E5RGF9_HUMAN]	3	3
E7EM64	COP9 signalosome complex subunit 6 OS=Homo sapiens GN=COPS6 PE=1 SV=1 - [E7EM64_HUMAN]	3
E7ENQ1	Mitogen-activated protein kinase kinase kinase kinase 4 OS=Homo sapiens GN=MAP4K4 PE=1 SV=1 - [E7ENQ1_HUMAN]	3	4
E7ERL0	Nucleoside diphosphate kinase A OS=Homo sapiens GN=NME1 PE=1 SV=1 - [E7ERL0_HUMAN]	3
E7ERW7	Dedicator of cytokinesis protein 2 OS=Homo sapiens GN=DOCK2 PE=1 SV=1 - [E7ERW7_HUMAN]	3
E7EVK1	Nuclear receptor corepressor 1 (Fragment) OS=Homo sapiens GN=NCOR1 PE=1 SV=2 - [E7EVK1_HUMAN]	3
E9PB90	Hexokinase OS=Homo sapiens GN=HK2 PE=1 SV=1 - [E9PB90_HUMAN]	3	6
E9PEI0	Cell division cycle-associated protein 2 OS=Homo sapiens GN=CDCA2 PE=1 SV=1 - [E9PEI0_HUMAN]	3	3
E9PFD4	BZW2 protein OS=Homo sapiens GN=BZW2 PE=1 SV=2 - [E9PFD4_HUMAN]	3
E9PLD2	Mitochondrial fission regulator 1-like OS=Homo sapiens GN=MTFR1L PE=1 SV=1 - [E9PLD2_HUMAN]	3
E9PPH5	Acidic leucine-rich nuclear phosphoprotein 32 family member E (Fragment) OS=Homo sapiens GN=ANP32E PE=1 SV=1 - [E9PPH5_HUMAN]	3
F5H658	ATP-dependent RNA helicase DHX8 OS=Homo sapiens GN=DHX8 PE=1 SV=1 - [F5H658_HUMAN]	3
G5EA31	Protein transport protein Sec24C OS=Homo sapiens GN=SEC24C PE=1 SV=1 - [G5EA31_HUMAN]	3	4
H0Y9T5	m7GpppN-mRNA hydrolase (Fragment) OS=Homo sapiens GN=DCP2 PE=1 SV=2 - [H0Y9T5_HUMAN]	3
H0YBZ9	Survival motor neuron protein (Fragment) OS=Homo sapiens GN=SMN1 PE=1 SV=1 - [H0YBZ9_HUMAN]	3
H0YGX7	Rho GDP-dissociation inhibitor 2 (Fragment) OS=Homo sapiens GN=ARHGDIB PE=1 SV=1 - [H0YGX7_HUMAN]	3
H0YJX6	Protein arginine N-methyltransferase 5 (Fragment) OS=Homo sapiens GN=PRMT5 PE=1 SV=1 - [H0YJX6_HUMAN]	3
H0YN26	Acidic leucine-rich nuclear phosphoprotein 32 family member A OS=Homo sapiens GN=ANP32A PE=1 SV=1 - [H0YN26_HUMAN]	3	2
H3BRS1	Nuclear factor of-activated T-cells, cytoplasmic 3 (Fragment) OS=Homo sapiens GN=NFATC3 PE=1 SV=1 - [H3BRS1_HUMAN]	3
H7BXI1	Extended synaptotagmin-2 (Fragment) OS=Homo sapiens GN=ESYT2 PE=1 SV=1 - [H7BXI1_HUMAN]	3	5
H7C123	60S ribosomal protein L10 (Fragment) OS=Homo sapiens GN=RPL10 PE=1 SV=1 - [H7C123_HUMAN]	3
H7C4C5	Microtubule-associated protein (Fragment) OS=Homo sapiens GN=MAP4 PE=1 SV=1 - [H7C4C5_HUMAN]	3
J3KR24	Isoleucine--tRNA ligase, cytoplasmic OS=Homo sapiens GN=IARS PE=1 SV=1 - [J3KR24_HUMAN]	3	5
K7EJ24	DnaJ homolog subfamily C member 7 (Fragment) OS=Homo sapiens GN=DNAJC7 PE=1 SV=1 - [K7EJ24_HUMAN]	3
K7EM13	cAMP-dependent protein kinase type I-alpha regulatory subunit (Fragment) OS=Homo sapiens GN=PRKAR1A PE=1 SV=1 - [K7EM13_HUMAN]	3	4
K7EMV3	Histone H3 OS=Homo sapiens GN=H3F3B PE=1 SV=1 - [K7EMV3_HUMAN]	3	2
K7EN31	Ran-binding protein 3 (Fragment) OS=Homo sapiens GN=RANBP3 PE=1 SV=6 - [K7EN31_HUMAN]	3
K7ES52	Thymidine kinase OS=Homo sapiens GN=TK1 PE=1 SV=1 - [K7ES52_HUMAN]	3	1
K7ESE8	Bleomycin hydrolase (Fragment) OS=Homo sapiens GN=BLMH PE=1 SV=1 - [K7ESE8_HUMAN]	3	2	1
M0QX71	Glutamate-rich WD repeat-containing protein 1 (Fragment) OS=Homo sapiens GN=GRWD1 PE=1 SV=1 - [M0QX71_HUMAN]	3	1
M0QY17	BRISC and BRCA1-A complex member 1 OS=Homo sapiens GN=BABAM1 PE=1 SV=1 - [M0QY17_HUMAN]	3
O00273	DNA fragmentation factor subunit alpha OS=Homo sapiens GN=DFFA PE=1 SV=1 - [DFFA_HUMAN]	3	6
O00629	Importin subunit alpha-3 OS=Homo sapiens GN=KPNA4 PE=1 SV=1 - [IMA3_HUMAN]	3	3
O15143	Actin-related protein 2/3 complex subunit 1B OS=Homo sapiens GN=ARPC1B PE=1 SV=3 - [ARC1B_HUMAN]	3	4
O43747	AP-1 complex subunit gamma-1 OS=Homo sapiens GN=AP1G1 PE=1 SV=5 - [AP1G1_HUMAN]	3	1
O60814	Histone H2B type 1-K OS=Homo sapiens GN=HIST1H2BK PE=1 SV=3 - [H2B1K_HUMAN]	3
O75533	Splicing factor 3B subunit 1 OS=Homo sapiens GN=SF3B1 PE=1 SV=3 - [SF3B1_HUMAN]	3	6
O95865	N(G),N(G)-dimethylarginine dimethylaminohydrolase 2 OS=Homo sapiens GN=DDAH2 PE=1 SV=1 - [DDAH2_HUMAN]	3
O96019	Actin-like protein 6A OS=Homo sapiens GN=ACTL6A PE=1 SV=1 - [ACL6A_HUMAN]	3	6
P02786	Transferrin receptor protein 1 OS=Homo sapiens GN=TFRC PE=1 SV=2 - [TFR1_HUMAN]	3
P05455	Lupus La protein OS=Homo sapiens GN=SSB PE=1 SV=2 - [LA_HUMAN]	3	3
P09960	Leukotriene A-4 hydrolase OS=Homo sapiens GN=LTA4H PE=1 SV=2 - [LKHA4_HUMAN]	3	1
P11908	Ribose-phosphate pyrophosphokinase 2 OS=Homo sapiens GN=PRPS2 PE=1 SV=2 - [PRPS2_HUMAN]	3	2
P12955	Xaa-Pro dipeptidase OS=Homo sapiens GN=PEPD PE=1 SV=3 - [PEPD_HUMAN]	3	2
P14550	Alcohol dehydrogenase [NADP(+)] OS=Homo sapiens GN=AKR1A1 PE=1 SV=3 - [AK1A1_HUMAN]	3	2
P19367	Hexokinase-1 OS=Homo sapiens GN=HK1 PE=1 SV=3 - [HXK1_HUMAN]	3
P20930	Filaggrin OS=Homo sapiens GN=FLG PE=1 SV=3 - [FILA_HUMAN]	3	3	1
P22061	Protein-L-isoaspartate(D-aspartate) O-methyltransferase OS=Homo sapiens GN=PCMT1 PE=1 SV=4 - [PIMT_HUMAN]	3	2
P27540	Aryl hydrocarbon receptor nuclear translocator OS=Homo sapiens GN=ARNT PE=1 SV=1 - [ARNT_HUMAN]	3	1
P27695	DNA-(apurinic or apyrimidinic site) lyase OS=Homo sapiens GN=APEX1 PE=1 SV=2 - [APEX1_HUMAN]	3
P30260	Cell division cycle protein 27 homolog OS=Homo sapiens GN=CDC27 PE=1 SV=2 - [CDC27_HUMAN]	3
P31944	Caspase-14 OS=Homo sapiens GN=CASP14 PE=1 SV=2 - [CASPE_HUMAN]	3	4	1
P36915	Guanine nucleotide-binding protein-like 1 OS=Homo sapiens GN=GNL1 PE=1 SV=2 - [GNL1_HUMAN]	3	2
P37837	Transaldolase OS=Homo sapiens GN=TALDO1 PE=1 SV=2 - [TALDO_HUMAN]	3	3
P43490	Nicotinamide phosphoribosyltransferase OS=Homo sapiens GN=NAMPT PE=1 SV=1 - [NAMPT_HUMAN]	3	2
P46060	Ran GTPase-activating protein 1 OS=Homo sapiens GN=RANGAP1 PE=1 SV=1 - [RAGP1_HUMAN]	3	5
P46439	Glutathione S-transferase Mu 5 OS=Homo sapiens GN=GSTM5 PE=1 SV=3 - [GSTM5_HUMAN]	3
P49721	Proteasome subunit beta type-2 OS=Homo sapiens GN=PSMB2 PE=1 SV=1 - [PSB2_HUMAN]	3
P57737	Coronin-7 OS=Homo sapiens GN=CORO7 PE=1 SV=2 - [CORO7_HUMAN]	3	5
P62701	40S ribosomal protein S4, X isoform OS=Homo sapiens GN=RPS4X PE=1 SV=2 - [RS4X_HUMAN]	3
P62753	40S ribosomal protein S6 OS=Homo sapiens GN=RPS6 PE=1 SV=1 - [RS6_HUMAN]	3	4
P62805	Histone H4 OS=Homo sapiens GN=HIST1H4A PE=1 SV=2 - [H4_HUMAN]	3
Q01081	Splicing factor U2AF 35 kDa subunit OS=Homo sapiens GN=U2AF1 PE=1 SV=3 - [U2AF1_HUMAN]	3	2
Q13123	Protein Red OS=Homo sapiens GN=IK PE=1 SV=3 - [RED_HUMAN]	3	1
Q13177	Serine/threonine-protein kinase PAK 2 OS=Homo sapiens GN=PAK2 PE=1 SV=3 - [PAK2_HUMAN]	3	5
Q14232	Translation initiation factor eIF-2B subunit alpha OS=Homo sapiens GN=EIF2B1 PE=1 SV=1 - [EI2BA_HUMAN]	3	2
Q14318	Peptidyl-prolyl cis-trans isomerase FKBP8 OS=Homo sapiens GN=FKBP8 PE=1 SV=2 - [FKBP8_HUMAN]	3	4
Q15021	Condensin complex subunit 1 OS=Homo sapiens GN=NCAPD2 PE=1 SV=3 - [CND1_HUMAN]	3	2
Q15386	Ubiquitin-protein ligase E3C OS=Homo sapiens GN=UBE3C PE=1 SV=3 - [UBE3C_HUMAN]	3	1
Q15424	Scaffold attachment factor B1 OS=Homo sapiens GN=SAFB PE=1 SV=4 - [SAFB1_HUMAN]	3
Q7Z2T5	TRMT1-like protein OS=Homo sapiens GN=TRMT1L PE=1 SV=2 - [TRM1L_HUMAN]	3	2
Q7Z4Q2	HEAT repeat-containing protein 3 OS=Homo sapiens GN=HEATR3 PE=1 SV=2 - [HEAT3_HUMAN]	3	4
Q7Z5L9	Interferon regulatory factor 2-binding protein 2 OS=Homo sapiens GN=IRF2BP2 PE=1 SV=2 - [I2BP2_HUMAN]	3	1
Q8IV96	DDX6 protein OS=Homo sapiens GN=DDX6 PE=1 SV=1 - [Q8IV96_HUMAN]	3	2
Q8IY81	pre-rRNA processing protein FTSJ3 OS=Homo sapiens GN=FTSJ3 PE=1 SV=2 - [SPB1_HUMAN]	3	3
Q8N5C6	S1 RNA-binding domain-containing protein 1 OS=Homo sapiens GN=SRBD1 PE=1 SV=2 - [SRBD1_HUMAN]	3	1
Q8NC51	Plasminogen activator inhibitor 1 RNA-binding protein OS=Homo sapiens GN=SERBP1 PE=1 SV=2 - [PAIRB_HUMAN]	3
Q92619	Minor histocompatibility protein HA-1 OS=Homo sapiens GN=HMHA1 PE=1 SV=2 - [HMHA1_HUMAN]	3
Q96AG4	Leucine-rich repeat-containing protein 59 OS=Homo sapiens GN=LRRC59 PE=1 SV=1 - [LRC59_HUMAN]	3	3
Q96EN8	Molybdenum cofactor sulfurase OS=Homo sapiens GN=MOCOS PE=1 SV=2 - [MOCOS_HUMAN]	3
Q96ER3	Protein SAAL1 OS=Homo sapiens GN=SAAL1 PE=1 SV=2 - [SAAL1_HUMAN]	3	2
Q96KK5	Histone H2A type 1-H OS=Homo sapiens GN=HIST1H2AH PE=1 SV=3 - [H2A1H_HUMAN]	3
Q96T76	MMS19 nucleotide excision repair protein homolog OS=Homo sapiens GN=MMS19 PE=1 SV=2 - [MMS19_HUMAN]	3
Q99661	Kinesin-like protein KIF2C OS=Homo sapiens GN=KIF2C PE=1 SV=2 - [KIF2C_HUMAN]	3	7
Q99733	Nucleosome assembly protein 1-like 4 OS=Homo sapiens GN=NAP1L4 PE=1 SV=1 - [NP1L4_HUMAN]	3
Q9H993	Protein-glutamate O-methyltransferase OS=Homo sapiens GN=ARMT1 PE=1 SV=1 - [ARMT1_HUMAN]	3
Q9NVH2	Integrator complex subunit 7 OS=Homo sapiens GN=INTS7 PE=1 SV=1 - [INT7_HUMAN]	3
Q9NXF1	Testis-expressed sequence 10 protein OS=Homo sapiens GN=TEX10 PE=1 SV=2 - [TEX10_HUMAN]	3	2
Q9NYZ3	G2 and S phase-expressed protein 1 OS=Homo sapiens GN=GTSE1 PE=1 SV=3 - [GTSE1_HUMAN]	3
Q9NZ09	Ubiquitin-associated protein 1 OS=Homo sapiens GN=UBAP1 PE=1 SV=1 - [UBAP1_HUMAN]	3	1
Q9UJW0	Dynactin subunit 4 OS=Homo sapiens GN=DCTN4 PE=1 SV=1 - [DCTN4_HUMAN]	3	2
Q9UK59	Lariat debranching enzyme OS=Homo sapiens GN=DBR1 PE=1 SV=2 - [DBR1_HUMAN]	3
Q9Y295	Developmentally-regulated GTP-binding protein 1 OS=Homo sapiens GN=DRG1 PE=1 SV=1 - [DRG1_HUMAN]	3
Q9Y371	Endophilin-B1 OS=Homo sapiens GN=SH3GLB1 PE=1 SV=1 - [SHLB1_HUMAN]	3	1
Q9Y6W5	Wiskott-Aldrich syndrome protein family member 2 OS=Homo sapiens GN=WASF2 PE=1 SV=3 - [WASF2_HUMAN]	3
Q9Y6Y8	SEC23-interacting protein OS=Homo sapiens GN=SEC23IP PE=1 SV=1 - [S23IP_HUMAN]	3	3
U3KQ26	Forkhead box protein K1 (Fragment) OS=Homo sapiens GN=FOXK1 PE=1 SV=1 - [U3KQ26_HUMAN]	3
A0A087WUZ6	InaD-like protein OS=Homo sapiens GN=INADL PE=1 SV=1 - [A0A087WUZ6_HUMAN]	2
A0A087WWF4	Kanadaptin (Fragment) OS=Homo sapiens GN=SLC4A1AP PE=1 SV=1 - [A0A087WWF4_HUMAN]	2	1
A0A087WX36	Integrin beta OS=Homo sapiens GN=ITGB2 PE=1 SV=1 - [A0A087WX36_HUMAN]	2	3
A0A087WX59	Proteasomal ubiquitin receptor ADRM1 OS=Homo sapiens GN=ADRM1 PE=1 SV=1 - [A0A087WX59_HUMAN]	2	1
A0A087WZ32	Pleckstrin homology domain-containing family A member 2 OS=Homo sapiens GN=PLEKHA2 PE=1 SV=1 - [A0A087WZ32_HUMAN]	2	2
A0A087WZK9	Eukaryotic translation initiation factor 3 subunit H OS=Homo sapiens GN=EIF3H PE=1 SV=1 - [A0A087WZK9_HUMAN]	2
A0A087X0M0	Coiled-coil domain-containing protein R3HCC1L OS=Homo sapiens GN=R3HCC1L PE=1 SV=1 - [A0A087X0M0_HUMAN]	2	4
A0A087X1A5	Double-stranded RNA-binding protein Staufen homolog 1 OS=Homo sapiens GN=STAU1 PE=1 SV=1 - [A0A087X1A5_HUMAN]	2
A0A0A0MT56	Cleavage stimulation factor subunit 2 (Fragment) OS=Homo sapiens GN=CSTF2 PE=1 SV=1 - [A0A0A0MT56_HUMAN]	2
A0A0A0MTN3	Glutathione S-transferase Mu 3 OS=Homo sapiens GN=GSTM3 PE=1 SV=1 - [A0A0A0MTN3_HUMAN]	2	8
A0A0A6YYB7	Rap guanine nucleotide exchange factor 6 OS=Homo sapiens GN=RAPGEF6 PE=1 SV=1 - [A0A0A6YYB7_HUMAN]	2	1
A0A0C4DFX0	Nucleolar protein 6 OS=Homo sapiens GN=NOL6 PE=1 SV=1 - [A0A0C4DFX0_HUMAN]	2
A0A0C4DG89	Probable ATP-dependent RNA helicase DDX46 OS=Homo sapiens GN=DDX46 PE=1 SV=1 - [A0A0C4DG89_HUMAN]	2
A0A0C4DGX4	Cullin-1 OS=Homo sapiens GN=CUL1 PE=1 SV=1 - [A0A0C4DGX4_HUMAN]	2
A2A2M0	Regulation of nuclear pre-mRNA domain-containing protein 1B (Fragment) OS=Homo sapiens GN=RPRD1B PE=1 SV=1 - [A2A2M0_HUMAN]	2
A6PVX3	26S proteasome non-ATPase regulatory subunit 4 (Fragment) OS=Homo sapiens GN=PSMD4 PE=1 SV=1 - [A6PVX3_HUMAN]	2
B0I1T2	Unconventional myosin-Ig OS=Homo sapiens GN=MYO1G PE=1 SV=2 - [MYO1G_HUMAN]	2	4
B1AH77	Ras-related C3 botulinum toxin substrate 2 OS=Homo sapiens GN=RAC2 PE=1 SV=1 - [B1AH77_HUMAN]	2
B1AH86	GRB2-related adapter protein 2 (Fragment) OS=Homo sapiens GN=GRAP2 PE=1 SV=1 - [B1AH86_HUMAN]	2	1
B3KR00	AMSH-like protease OS=Homo sapiens GN=STAMBPL1 PE=1 SV=1 - [B3KR00_HUMAN]	2
B3KRF7	Zinc finger protein with KRAB and SCAN domains 1 OS=Homo sapiens GN=ZKSCAN1 PE=1 SV=1 - [B3KRF7_HUMAN]	2
B3KT28	FAS-associated factor 1 OS=Homo sapiens GN=FAF1 PE=1 SV=1 - [B3KT28_HUMAN]	2	1
B4DGW0	E3 SUMO-protein ligase PIAS2 OS=Homo sapiens GN=PIAS2 PE=1 SV=1 - [B4DGW0_HUMAN]	2	1
B5MBZ8	Protein phosphatase 1 regulatory subunit 7 OS=Homo sapiens GN=PPP1R7 PE=1 SV=1 - [B5MBZ8_HUMAN]	2	1
B7ZC39	Endophilin-B2 OS=Homo sapiens GN=SH3GLB2 PE=1 SV=1 - [B7ZC39_HUMAN]	2
C9IZ83	DnaJ homolog subfamily C member 2 (Fragment) OS=Homo sapiens GN=DNAJC2 PE=1 SV=1 - [C9IZ83_HUMAN]	2	1
C9J9W7	CCAAT/enhancer-binding protein zeta (Fragment) OS=Homo sapiens GN=CEBPZ PE=1 SV=1 - [C9J9W7_HUMAN]	2
C9JAT7	UBX domain-containing protein 7 OS=Homo sapiens GN=UBXN7 PE=1 SV=1 - [C9JAT7_HUMAN]	2
C9JBL0	Nuclear autoantigen Sp-100 (Fragment) OS=Homo sapiens GN=SP100 PE=1 SV=6 - [C9JBL0_HUMAN]	2	2
C9JWQ4	Mitogen-activated protein kinase 8 (Fragment) OS=Homo sapiens GN=MAPK8 PE=4 SV=1 - [C9JWQ4_HUMAN]	2
D6RCF2	Histone H2A OS=Homo sapiens GN=H2AFY PE=1 SV=1 - [D6RCF2_HUMAN]	2
D6RDY6	Signal recognition particle subunit SRP72 (Fragment) OS=Homo sapiens GN=SRP72 PE=1 SV=2 - [D6RDY6_HUMAN]	2
D6REZ1	Protein Spindly (Fragment) OS=Homo sapiens GN=SPDL1 PE=1 SV=1 - [D6REZ1_HUMAN]	2
D6RG15	Twinfilin-2 OS=Homo sapiens GN=TWF2 PE=1 SV=1 - [D6RG15_HUMAN]	2	1
D6RIB3	H/ACA ribonucleoprotein complex non-core subunit NAF1 OS=Homo sapiens GN=NAF1 PE=1 SV=1 - [D6RIB3_HUMAN]	2
E5RK46	Transcription elongation factor A protein 1 OS=Homo sapiens GN=TCEA1 PE=1 SV=1 - [E5RK46_HUMAN]	2
E7EPV1	Speedy protein A (Fragment) OS=Homo sapiens GN=SPDYA PE=4 SV=1 - [E7EPV1_HUMAN]	2
E7EQ01	Caspase-8 (Fragment) OS=Homo sapiens GN=CASP8 PE=1 SV=1 - [E7EQ01_HUMAN]	2	2
E7ES68	Zinc phosphodiesterase ELAC protein 2 (Fragment) OS=Homo sapiens GN=ELAC2 PE=1 SV=2 - [E7ES68_HUMAN]	2
E7EUH7	Pseudouridylate synthase 7 homolog OS=Homo sapiens GN=PUS7 PE=1 SV=1 - [E7EUH7_HUMAN]	2
E9PCM6	Rho GTPase-activating protein 4 OS=Homo sapiens GN=ARHGAP4 PE=1 SV=1 - [E9PCM6_HUMAN]	2
E9PFZ1	Uncharacterized protein C3orf38 OS=Homo sapiens GN=C3orf38 PE=1 SV=1 - [E9PFZ1_HUMAN]	2	1
E9PL11	Nuclear transcription factor Y subunit gamma (Fragment) OS=Homo sapiens GN=NFYC PE=1 SV=1 - [E9PL11_HUMAN]	2
E9PLF1	Glutathione S-transferase Mu 2 (Fragment) OS=Homo sapiens GN=GSTM2 PE=1 SV=2 - [E9PLF1_HUMAN]	2
E9PN76	RING finger protein 214 OS=Homo sapiens GN=RNF214 PE=1 SV=1 - [E9PN76_HUMAN]	2
E9PNF3	L-aminoadipate-semialdehyde dehydrogenase-phosphopantetheinyl transferase (Fragment) OS=Homo sapiens GN=AASDHPPT PE=1 SV=1 - [E9PNF3_HUMAN]	2
E9PNS3	Toll-interacting protein OS=Homo sapiens GN=TOLLIP PE=1 SV=1 - [E9PNS3_HUMAN]	2
E9PPZ7	FACT complex subunit SSRP1 (Fragment) OS=Homo sapiens GN=SSRP1 PE=1 SV=1 - [E9PPZ7_HUMAN]	2
E9PR95	Ester hydrolase C11orf54 (Fragment) OS=Homo sapiens GN=C11orf54 PE=1 SV=6 - [E9PR95_HUMAN]	2	1
E9PRQ6	Acetyl-CoA acetyltransferase, mitochondrial OS=Homo sapiens GN=ACAT1 PE=1 SV=1 - [E9PRQ6_HUMAN]	2
E9PRS8	Cysteine--tRNA ligase, cytoplasmic OS=Homo sapiens GN=CARS PE=1 SV=1 - [E9PRS8_HUMAN]	2
E9PRZ9	Small acidic protein (Fragment) OS=Homo sapiens GN=C11orf58 PE=1 SV=1 - [E9PRZ9_HUMAN]	2	1
F2Z2B9	Gamma-tubulin complex component 2 OS=Homo sapiens GN=TUBGCP2 PE=1 SV=1 - [F2Z2B9_HUMAN]	2	1
F2Z3P2	Uridine 5'-monophosphate synthase OS=Homo sapiens GN=UMPS PE=1 SV=1 - [F2Z3P2_HUMAN]	2	2
F5H2X8	5'-AMP-activated protein kinase subunit beta-1 OS=Homo sapiens GN=PRKAB1 PE=1 SV=1 - [F5H2X8_HUMAN]	2
F8VUA7	Oxysterol-binding protein (Fragment) OS=Homo sapiens GN=OSBPL8 PE=1 SV=6 - [F8VUA7_HUMAN]	2	1
F8VWL0	Alpha-globin transcription factor CP2 (Fragment) OS=Homo sapiens GN=TFCP2 PE=1 SV=1 - [F8VWL0_HUMAN]	2
F8VY04	Adenylate kinase 2, mitochondrial OS=Homo sapiens GN=AK2 PE=1 SV=1 - [F8VY04_HUMAN]	2
F8W1I4	La-related protein 4 (Fragment) OS=Homo sapiens GN=LARP4 PE=1 SV=1 - [F8W1I4_HUMAN]	2
F8W9S7	GTPase-activating protein and VPS9 domain-containing protein 1 OS=Homo sapiens GN=GAPVD1 PE=1 SV=1 - [F8W9S7_HUMAN]	2	4
G3V1A1	60S ribosomal protein L8 OS=Homo sapiens GN=RPL8 PE=1 SV=1 - [G3V1A1_HUMAN]	2
G5E9S8	Kinesin light chain 1 OS=Homo sapiens GN=KLC1 PE=1 SV=1 - [G5E9S8_HUMAN]	2
H0Y3K0	Importin subunit alpha-6 (Fragment) OS=Homo sapiens GN=KPNA5 PE=4 SV=1 - [H0Y3K0_HUMAN]	2
H0Y8H4	E3 ubiquitin-protein ligase NEDD4 (Fragment) OS=Homo sapiens GN=NEDD4 PE=1 SV=1 - [H0Y8H4_HUMAN]	2	1
H0Y8R1	G-rich sequence factor 1 (Fragment) OS=Homo sapiens GN=GRSF1 PE=1 SV=1 - [H0Y8R1_HUMAN]	2
H0YAC6	Lipopolysaccharide-responsive and beige-like anchor protein (Fragment) OS=Homo sapiens GN=LRBA PE=1 SV=1 - [H0YAC6_HUMAN]	2
H0YAR3	DNA topoisomerase I, mitochondrial (Fragment) OS=Homo sapiens GN=TOP1MT PE=1 SV=1 - [H0YAR3_HUMAN]	2
H0YAY0	Transforming acidic coiled-coil-containing protein 1 (Fragment) OS=Homo sapiens GN=TACC1 PE=1 SV=1 - [H0YAY0_HUMAN]	2	2
H0YB37	Tetratricopeptide repeat protein 1 (Fragment) OS=Homo sapiens GN=TTC1 PE=1 SV=1 - [H0YB37_HUMAN]	2
H0YBP2	Transcription factor 7 (Fragment) OS=Homo sapiens GN=TCF7 PE=1 SV=1 - [H0YBP2_HUMAN]	2	1
H0YC16	Phospholipase A-2-activating protein (Fragment) OS=Homo sapiens GN=PLAA PE=1 SV=1 - [H0YC16_HUMAN]	2
H0YDU8	Serine/threonine-protein phosphatase (Fragment) OS=Homo sapiens GN=PPP5C PE=1 SV=1 - [H0YDU8_HUMAN]	2
H0YFC6	GTP-binding nuclear protein Ran (Fragment) OS=Homo sapiens GN=RAN PE=1 SV=1 - [H0YFC6_HUMAN]	2
H0YIZ6	HAUS augmin-like complex subunit 4 (Fragment) OS=Homo sapiens GN=HAUS4 PE=1 SV=1 - [H0YIZ6_HUMAN]	2
H0YJL6	Ena/VASP-like protein (Fragment) OS=Homo sapiens GN=EVL PE=1 SV=1 - [H0YJL6_HUMAN]	2
H0YJS8	26S protease regulatory subunit 10B (Fragment) OS=Homo sapiens GN=PSMC6 PE=1 SV=2 - [H0YJS8_HUMAN]	2
H0YM03	COP9 signalosome complex subunit 2 (Fragment) OS=Homo sapiens GN=COPS2 PE=1 SV=1 - [H0YM03_HUMAN]	2	1
H3BQZ7	HCG2044799 OS=Homo sapiens GN=HNRNPUL2-BSCL2 PE=4 SV=1 - [H3BQZ7_HUMAN]	2	6
H3BRB3	Kinesin-like protein OS=Homo sapiens GN=KIF22 PE=1 SV=1 - [H3BRB3_HUMAN]	2	1
H3BRE8	RNA polymerase II-associated protein 1 OS=Homo sapiens GN=RPAP1 PE=1 SV=1 - [H3BRE8_HUMAN]	2	1
H7BY36	RNA-binding protein EWS (Fragment) OS=Homo sapiens GN=EWSR1 PE=1 SV=1 - [H7BY36_HUMAN]	2	3
H7C207	R3H domain-containing protein 1 (Fragment) OS=Homo sapiens GN=R3HDM1 PE=1 SV=1 - [H7C207_HUMAN]	2
H7C2I6	Interleukin-1 receptor-associated kinase 1 (Fragment) OS=Homo sapiens GN=IRAK1 PE=1 SV=1 - [H7C2I6_HUMAN]	2
H7C4Y5	Centrosomal protein of 97 kDa (Fragment) OS=Homo sapiens GN=CEP97 PE=1 SV=1 - [H7C4Y5_HUMAN]	2
H7C5I3	Tyrosine-protein phosphatase non-receptor type 7 (Fragment) OS=Homo sapiens GN=PTPN7 PE=1 SV=2 - [H7C5I3_HUMAN]	2
H7C5L6	SRSF protein kinase 2 (Fragment) OS=Homo sapiens GN=SRPK2 PE=1 SV=1 - [H7C5L6_HUMAN]	2
I3L0H8	ATP-dependent RNA helicase DDX19A OS=Homo sapiens GN=DDX19A PE=1 SV=1 - [I3L0H8_HUMAN]	2
I3L397	Eukaryotic translation initiation factor 5A (Fragment) OS=Homo sapiens GN=EIF5A PE=1 SV=6 - [I3L397_HUMAN]	2
I3L3W4	ABI gene family member 3 (Fragment) OS=Homo sapiens GN=ABI3 PE=1 SV=1 - [I3L3W4_HUMAN]	2
I3L4D2	Tubulin-specific chaperone D (Fragment) OS=Homo sapiens GN=TBCD PE=1 SV=1 - [I3L4D2_HUMAN]	2
J3KNC2	N-alpha-acetyltransferase 30 (Fragment) OS=Homo sapiens GN=NAA30 PE=1 SV=1 - [J3KNC2_HUMAN]	2
J3KNE3	Platelet-activating factor acetylhydrolase IB subunit beta (Fragment) OS=Homo sapiens GN=PAFAH1B2 PE=1 SV=1 - [J3KNE3_HUMAN]	2	2
J3KSR8	Serine/arginine-rich-splicing factor 1 (Fragment) OS=Homo sapiens GN=SRSF1 PE=1 SV=1 - [J3KSR8_HUMAN]	2
J3QLH1	ARF GTPase-activating protein GIT1 (Fragment) OS=Homo sapiens GN=GIT1 PE=1 SV=6 - [J3QLH1_HUMAN]	2
J3QQY0	Male-specific lethal 1 homolog OS=Homo sapiens GN=MSL1 PE=1 SV=1 - [J3QQY0_HUMAN]	2
K7EJC1	26S proteasome non-ATPase regulatory subunit 8 OS=Homo sapiens GN=PSMD8 PE=1 SV=1 - [K7EJC1_HUMAN]	2	1
K7EJE8	Lon protease homolog OS=Homo sapiens GN=LONP1 PE=1 SV=1 - [K7EJE8_HUMAN]	2	3
K7EMD6	Small glutamine-rich tetratricopeptide repeat-containing protein alpha (Fragment) OS=Homo sapiens GN=SGTA PE=1 SV=1 - [K7EMD6_HUMAN]	2
K7EMQ8	SWI/SNF-related matrix-associated actin-dependent regulator of chromatin subfamily E member 1 (Fragment) OS=Homo sapiens GN=SMARCE1 PE=1 SV=1 - [K7EMQ8_HUMAN]	2
K7EN20	Hsp70-binding protein 1 (Fragment) OS=Homo sapiens GN=HSPBP1 PE=1 SV=1 - [K7EN20_HUMAN]	2
K7ENA3	Protein syndesmos OS=Homo sapiens GN=NUDT16L1 PE=1 SV=1 - [K7ENA3_HUMAN]	2
K7EP16	Eukaryotic translation initiation factor 3 subunit G (Fragment) OS=Homo sapiens GN=EIF3G PE=1 SV=1 - [K7EP16_HUMAN]	2
K7EPL2	SUMO-activating enzyme subunit 2 (Fragment) OS=Homo sapiens GN=UBA2 PE=1 SV=2 - [K7EPL2_HUMAN]	2	1
K7EQB6	DNA ligase 3 (Fragment) OS=Homo sapiens GN=LIG3 PE=1 SV=1 - [K7EQB6_HUMAN]	2
K7ER96	Thioredoxin-like protein 1 (Fragment) OS=Homo sapiens GN=TXNL1 PE=1 SV=1 - [K7ER96_HUMAN]	2
K7ES11	(E3-independent) E2 ubiquitin-conjugating enzyme (Fragment) OS=Homo sapiens GN=UBE2O PE=1 SV=1 - [K7ES11_HUMAN]	2
M0QX76	40S ribosomal protein S16 (Fragment) OS=Homo sapiens GN=RPS16 PE=1 SV=1 - [M0QX76_HUMAN]	2
M0QY97	Zinc finger CCCH domain-containing protein 4 (Fragment) OS=Homo sapiens GN=ZC3H4 PE=1 SV=1 - [M0QY97_HUMAN]	2
M0QYS3	Rho guanine nucleotide exchange factor 1 (Fragment) OS=Homo sapiens GN=ARHGEF1 PE=1 SV=1 - [M0QYS3_HUMAN]	2	1
O00139	Kinesin-like protein KIF2A OS=Homo sapiens GN=KIF2A PE=1 SV=3 - [KIF2A_HUMAN]	2	4
O00560	Syntenin-1 OS=Homo sapiens GN=SDCBP PE=1 SV=1 - [SDCB1_HUMAN]	2
O15042	U2 snRNP-associated SURP motif-containing protein OS=Homo sapiens GN=U2SURP PE=1 SV=2 - [SR140_HUMAN]	2	1
O43156	TELO2-interacting protein 1 homolog OS=Homo sapiens GN=TTI1 PE=1 SV=3 - [TTI1_HUMAN]	2
O43592	Exportin-T OS=Homo sapiens GN=XPOT PE=1 SV=2 - [XPOT_HUMAN]	2	1
O60313	Dynamin-like 120 kDa protein, mitochondrial OS=Homo sapiens GN=OPA1 PE=1 SV=3 - [OPA1_HUMAN]	2
O60749	Sorting nexin-2 OS=Homo sapiens GN=SNX2 PE=1 SV=2 - [SNX2_HUMAN]	2
O75446	Histone deacetylase complex subunit SAP30 OS=Homo sapiens GN=SAP30 PE=1 SV=1 - [SAP30_HUMAN]	2	1
O75792	Ribonuclease H2 subunit A OS=Homo sapiens GN=RNASEH2A PE=1 SV=2 - [RNH2A_HUMAN]	2	1
O94819	Kelch repeat and BTB domain-containing protein 11 OS=Homo sapiens GN=KBTBD11 PE=1 SV=1 - [KBTBB_HUMAN]	2
O94992	Protein HEXIM1 OS=Homo sapiens GN=HEXIM1 PE=1 SV=1 - [HEXI1_HUMAN]	2	2
O95456	Proteasome assembly chaperone 1 OS=Homo sapiens GN=PSMG1 PE=1 SV=1 - [PSMG1_HUMAN]	2	1
O95551	Tyrosyl-DNA phosphodiesterase 2 OS=Homo sapiens GN=TDP2 PE=1 SV=1 - [TYDP2_HUMAN]	2	2
P00367	Glutamate dehydrogenase 1, mitochondrial OS=Homo sapiens GN=GLUD1 PE=1 SV=2 - [DHE3_HUMAN]	2	1
P00390	Glutathione reductase, mitochondrial OS=Homo sapiens GN=GSR PE=1 SV=2 - [GSHR_HUMAN]	2	1
P00505	Aspartate aminotransferase, mitochondrial OS=Homo sapiens GN=GOT2 PE=1 SV=3 - [AATM_HUMAN]	2	2
P01031	Complement C5 OS=Homo sapiens GN=C5 PE=1 SV=4 - [CO5_HUMAN]	2
P04004	Vitronectin OS=Homo sapiens GN=VTN PE=1 SV=1 - [VTNC_HUMAN]	2	1
P05089	Arginase-1 OS=Homo sapiens GN=ARG1 PE=1 SV=2 - [ARGI1_HUMAN]	2	4	2
P05386	60S acidic ribosomal protein P1 OS=Homo sapiens GN=RPLP1 PE=1 SV=1 - [RLA1_HUMAN]	2	1
P06732	Creatine kinase M-type OS=Homo sapiens GN=CKM PE=1 SV=2 - [KCRM_HUMAN]	2
P11387	DNA topoisomerase 1 OS=Homo sapiens GN=TOP1 PE=1 SV=2 - [TOP1_HUMAN]	2	2
P18615	Negative elongation factor E OS=Homo sapiens GN=NELFE PE=1 SV=3 - [NELFE_HUMAN]	2
P20248	Cyclin-A2 OS=Homo sapiens GN=CCNA2 PE=1 SV=2 - [CCNA2_HUMAN]	2
P23368	NAD-dependent malic enzyme, mitochondrial OS=Homo sapiens GN=ME2 PE=1 SV=1 - [MAOM_HUMAN]	2	1
P26374	Rab proteins geranylgeranyltransferase component A 2 OS=Homo sapiens GN=CHML PE=1 SV=2 - [RAE2_HUMAN]	2	1
P27824	Calnexin OS=Homo sapiens GN=CANX PE=1 SV=2 - [CALX_HUMAN]	2	3
P30084	Enoyl-CoA hydratase, mitochondrial OS=Homo sapiens GN=ECHS1 PE=1 SV=4 - [ECHM_HUMAN]	2	1
P38432	Coilin OS=Homo sapiens GN=COIL PE=1 SV=1 - [COIL_HUMAN]	2
P42357	Histidine ammonia-lyase OS=Homo sapiens GN=HAL PE=1 SV=1 - [HUTH_HUMAN]	2
P46109	Crk-like protein OS=Homo sapiens GN=CRKL PE=1 SV=1 - [CRKL_HUMAN]	2
P49327	Fatty acid synthase OS=Homo sapiens GN=FASN PE=1 SV=3 - [FAS_HUMAN]	2	3
P49591	Serine--tRNA ligase, cytoplasmic OS=Homo sapiens GN=SARS PE=1 SV=3 - [SYSC_HUMAN]	2	2
P49711	Transcriptional repressor CTCF OS=Homo sapiens GN=CTCF PE=1 SV=1 - [CTCF_HUMAN]	2	1
P49903	Selenide, water dikinase 1 OS=Homo sapiens GN=SEPHS1 PE=1 SV=2 - [SPS1_HUMAN]	2
P53621	Coatomer subunit alpha OS=Homo sapiens GN=COPA PE=1 SV=2 - [COPA_HUMAN]	2	5
P56524	Histone deacetylase 4 OS=Homo sapiens GN=HDAC4 PE=1 SV=3 - [HDAC4_HUMAN]	2
P62191	26S protease regulatory subunit 4 OS=Homo sapiens GN=PSMC1 PE=1 SV=1 - [PRS4_HUMAN]	2	3
P62906	60S ribosomal protein L10a OS=Homo sapiens GN=RPL10A PE=1 SV=2 - [RL10A_HUMAN]	2	1
P62993	Growth factor receptor-bound protein 2 OS=Homo sapiens GN=GRB2 PE=1 SV=1 - [GRB2_HUMAN]	2
P78406	mRNA export factor OS=Homo sapiens GN=RAE1 PE=1 SV=1 - [RAE1L_HUMAN]	2	2
Q06124	Tyrosine-protein phosphatase non-receptor type 11 OS=Homo sapiens GN=PTPN11 PE=1 SV=2 - [PTN11_HUMAN]	2	4
Q06210	Glutamine--fructose-6-phosphate aminotransferase [isomerizing] 1 OS=Homo sapiens GN=GFPT1 PE=1 SV=3 - [GFPT1_HUMAN]	2
Q08380	Galectin-3-binding protein OS=Homo sapiens GN=LGALS3BP PE=1 SV=1 - [LG3BP_HUMAN]	2
Q08J23	tRNA (cytosine(34)-C(5))-methyltransferase OS=Homo sapiens GN=NSUN2 PE=1 SV=2 - [NSUN2_HUMAN]	2	2
Q13426	DNA repair protein XRCC4 OS=Homo sapiens GN=XRCC4 PE=1 SV=2 - [XRCC4_HUMAN]	2	2
Q13564	NEDD8-activating enzyme E1 regulatory subunit OS=Homo sapiens GN=NAE1 PE=1 SV=1 - [ULA1_HUMAN]	2	1
Q14145	Kelch-like ECH-associated protein 1 OS=Homo sapiens GN=KEAP1 PE=1 SV=2 - [KEAP1_HUMAN]	2
Q14739	Lamin-B receptor OS=Homo sapiens GN=LBR PE=1 SV=2 - [LBR_HUMAN]	2	1
Q14CB8	Rho GTPase-activating protein 19 OS=Homo sapiens GN=ARHGAP19 PE=1 SV=1 - [RHG19_HUMAN]	2
Q15084	Protein disulfide-isomerase A6 OS=Homo sapiens GN=PDIA6 PE=1 SV=1 - [PDIA6_HUMAN]	2	3
Q15477	Helicase SKI2W OS=Homo sapiens GN=SKIV2L PE=1 SV=3 - [SKIV2_HUMAN]	2
Q27J81	Inverted formin-2 OS=Homo sapiens GN=INF2 PE=1 SV=2 - [INF2_HUMAN]	2	1
Q2TAL8	Glutamine-rich protein 1 OS=Homo sapiens GN=QRICH1 PE=1 SV=1 - [QRIC1_HUMAN]	2	1
Q53EL6	Programmed cell death protein 4 OS=Homo sapiens GN=PDCD4 PE=1 SV=2 - [PDCD4_HUMAN]	2	3
Q5RIB5	COBW domain-containing protein 3 OS=Homo sapiens GN=CBWD5 PE=4 SV=1 - [Q5RIB5_HUMAN]	2
Q5T0R7	Adenylyl cyclase-associated protein (Fragment) OS=Homo sapiens GN=CAP1 PE=1 SV=1 - [Q5T0R7_HUMAN]	2
Q5T2N8	ATPase family AAA domain-containing protein 3C OS=Homo sapiens GN=ATAD3C PE=2 SV=2 - [ATD3C_HUMAN]	2
Q5T7N0	60S ribosomal protein L5 (Fragment) OS=Homo sapiens GN=RPL5 PE=1 SV=2 - [Q5T7N0_HUMAN]	2
Q5TA01	Glutathione S-transferase omega-1 (Fragment) OS=Homo sapiens GN=GSTO1 PE=1 SV=1 - [Q5TA01_HUMAN]	2	3
Q5VT52	Regulation of nuclear pre-mRNA domain-containing protein 2 OS=Homo sapiens GN=RPRD2 PE=1 SV=1 - [RPRD2_HUMAN]	2
Q5VU10	Ribonuclease P protein subunit p30 (Fragment) OS=Homo sapiens GN=RPP30 PE=1 SV=1 - [Q5VU10_HUMAN]	2	1
Q5VY60	HAUS augmin-like complex subunit 6 OS=Homo sapiens GN=HAUS6 PE=1 SV=1 - [Q5VY60_HUMAN]	2
Q66K14	TBC1 domain family member 9B OS=Homo sapiens GN=TBC1D9B PE=1 SV=3 - [TBC9B_HUMAN]	2
Q6AWB1	Dynactin subunit 1 OS=Homo sapiens GN=DKFZp686E0752 PE=1 SV=1 - [Q6AWB1_HUMAN]	2	1
Q6IA86	Elongator complex protein 2 OS=Homo sapiens GN=ELP2 PE=1 SV=2 - [ELP2_HUMAN]	2	1
Q6IQ49	Protein SDE2 homolog OS=Homo sapiens GN=SDE2 PE=1 SV=1 - [SDE2_HUMAN]	2
Q6KB66	Keratin, type II cytoskeletal 80 OS=Homo sapiens GN=KRT80 PE=1 SV=2 - [K2C80_HUMAN]	2	10
Q6PCE3	Glucose 1,6-bisphosphate synthase OS=Homo sapiens GN=PGM2L1 PE=1 SV=3 - [PGM2L_HUMAN]	2
Q6PJG6	BRCA1-associated ATM activator 1 OS=Homo sapiens GN=BRAT1 PE=1 SV=2 - [BRAT1_HUMAN]	2	1
Q6ZSR9	Uncharacterized protein FLJ45252 OS=Homo sapiens PE=2 SV=2 - [YJ005_HUMAN]	2
Q6ZVX7	F-box only protein 50 OS=Homo sapiens GN=NCCRP1 PE=1 SV=1 - [FBX50_HUMAN]	2	2
Q70J99	Protein unc-13 homolog D OS=Homo sapiens GN=UNC13D PE=1 SV=1 - [UN13D_HUMAN]	2	3
Q7Z3K3	Pogo transposable element with ZNF domain OS=Homo sapiens GN=POGZ PE=1 SV=2 - [POGZ_HUMAN]	2	1
Q86SW4	Dihydrolipoyllysine-residue succinyltransferase component of 2-oxoglutarate dehydrogenase complex, mitochondrial (Fragment) OS=Homo sapiens GN=DLST PE=1 SV=1 - [Q86SW4_HUMAN]	2
Q86VM6	MBNL1 protein OS=Homo sapiens GN=MBNL1 PE=1 SV=1 - [Q86VM6_HUMAN]	2
Q86W42	THO complex subunit 6 homolog OS=Homo sapiens GN=THOC6 PE=1 SV=1 - [THOC6_HUMAN]	2
Q86W56	Poly(ADP-ribose) glycohydrolase OS=Homo sapiens GN=PARG PE=1 SV=1 - [PARG_HUMAN]	2	2
Q8IU81	Interferon regulatory factor 2-binding protein 1 OS=Homo sapiens GN=IRF2BP1 PE=1 SV=1 - [I2BP1_HUMAN]	2
Q8TEQ6	Gem-associated protein 5 OS=Homo sapiens GN=GEMIN5 PE=1 SV=3 - [GEMI5_HUMAN]	2	1
Q8WYQ5	Microprocessor complex subunit DGCR8 OS=Homo sapiens GN=DGCR8 PE=1 SV=1 - [DGCR8_HUMAN]	2	1
Q92621	Nuclear pore complex protein Nup205 OS=Homo sapiens GN=NUP205 PE=1 SV=3 - [NU205_HUMAN]	2	4
Q92889	DNA repair endonuclease XPF OS=Homo sapiens GN=ERCC4 PE=1 SV=3 - [XPF_HUMAN]	2
Q92900	Regulator of nonsense transcripts 1 OS=Homo sapiens GN=UPF1 PE=1 SV=2 - [RENT1_HUMAN]	2	2
Q93084	Sarcoplasmic/endoplasmic reticulum calcium ATPase 3 OS=Homo sapiens GN=ATP2A3 PE=1 SV=2 - [AT2A3_HUMAN]	2	5
Q96CS3	FAS-associated factor 2 OS=Homo sapiens GN=FAF2 PE=1 SV=2 - [FAF2_HUMAN]	2
Q96IY1	Kinetochore-associated protein NSL1 homolog OS=Homo sapiens GN=NSL1 PE=1 SV=3 - [NSL1_HUMAN]	2	2
Q96K76	Ubiquitin carboxyl-terminal hydrolase 47 OS=Homo sapiens GN=USP47 PE=1 SV=3 - [UBP47_HUMAN]	2	6
Q96KP1	Exocyst complex component 2 OS=Homo sapiens GN=EXOC2 PE=1 SV=1 - [EXOC2_HUMAN]	2	1
Q96RG2	PAS domain-containing serine/threonine-protein kinase OS=Homo sapiens GN=PASK PE=1 SV=3 - [PASK_HUMAN]	2	4
Q96RL1	BRCA1-A complex subunit RAP80 OS=Homo sapiens GN=UIMC1 PE=1 SV=2 - [UIMC1_HUMAN]	2
Q96RR4	Calcium/calmodulin-dependent protein kinase kinase 2 OS=Homo sapiens GN=CAMKK2 PE=1 SV=2 - [KKCC2_HUMAN]	2
Q96T51	RUN and FYVE domain-containing protein 1 OS=Homo sapiens GN=RUFY1 PE=1 SV=2 - [RUFY1_HUMAN]	2	6
Q99575	Ribonucleases P/MRP protein subunit POP1 OS=Homo sapiens GN=POP1 PE=1 SV=2 - [POP1_HUMAN]	2
Q9BPX3	Condensin complex subunit 3 OS=Homo sapiens GN=NCAPG PE=1 SV=1 - [CND3_HUMAN]	2	3
Q9BYV9	Transcription regulator protein BACH2 OS=Homo sapiens GN=BACH2 PE=1 SV=1 - [BACH2_HUMAN]	2
Q9H4E7	Differentially expressed in FDCP 6 homolog OS=Homo sapiens GN=DEF6 PE=1 SV=1 - [DEFI6_HUMAN]	2	1
Q9H7E9	UPF0488 protein C8orf33 OS=Homo sapiens GN=C8orf33 PE=1 SV=1 - [CH033_HUMAN]	2
Q9H8G2	Caspase activity and apoptosis inhibitor 1 OS=Homo sapiens GN=CAAP1 PE=1 SV=2 - [CAAP1_HUMAN]	2	2
Q9NPI1	Bromodomain-containing protein 7 OS=Homo sapiens GN=BRD7 PE=1 SV=1 - [BRD7_HUMAN]	2
Q9NQT5	Exosome complex component RRP40 OS=Homo sapiens GN=EXOSC3 PE=1 SV=3 - [EXOS3_HUMAN]	2	1
Q9NUB1	Acetyl-coenzyme A synthetase 2-like, mitochondrial OS=Homo sapiens GN=ACSS1 PE=1 SV=2 - [ACS2L_HUMAN]	2	1
Q9NW82	WD repeat-containing protein 70 OS=Homo sapiens GN=WDR70 PE=1 SV=1 - [WDR70_HUMAN]	2
Q9NWZ5	Uridine-cytidine kinase-like 1 OS=Homo sapiens GN=UCKL1 PE=1 SV=2 - [UCKL1_HUMAN]	2
Q9NXV6	CDKN2A-interacting protein OS=Homo sapiens GN=CDKN2AIP PE=1 SV=3 - [CARF_HUMAN]	2	2
Q9P2I0	Cleavage and polyadenylation specificity factor subunit 2 OS=Homo sapiens GN=CPSF2 PE=1 SV=2 - [CPSF2_HUMAN]	2	2
Q9UDT1	Rhomboid domain-containing protein 2 OS=Homo sapiens GN=WUGSC:H_RG122E10.2a PE=1 SV=1 - [Q9UDT1_HUMAN]	2
Q9UHY1	Nuclear receptor-binding protein OS=Homo sapiens GN=NRBP1 PE=1 SV=1 - [NRBP_HUMAN]	2
Q9UL42	Paraneoplastic antigen Ma2 OS=Homo sapiens GN=PNMA2 PE=1 SV=2 - [PNMA2_HUMAN]	2	2
Q9UPN6	Protein SCAF8 OS=Homo sapiens GN=SCAF8 PE=1 SV=1 - [SCAF8_HUMAN]	2
Q9UQE7	Structural maintenance of chromosomes protein 3 OS=Homo sapiens GN=SMC3 PE=1 SV=2 - [SMC3_HUMAN]	2	2
Q9Y3I0	tRNA-splicing ligase RtcB homolog OS=Homo sapiens GN=RTCB PE=1 SV=1 - [RTCB_HUMAN]	2	5
Q9Y450	HBS1-like protein OS=Homo sapiens GN=HBS1L PE=1 SV=1 - [HBS1L_HUMAN]	2	2
Q9Y4R8	Telomere length regulation protein TEL2 homolog OS=Homo sapiens GN=TELO2 PE=1 SV=2 - [TELO2_HUMAN]	2	1
Q9Y5B9	FACT complex subunit SPT16 OS=Homo sapiens GN=SUPT16H PE=1 SV=1 - [SP16H_HUMAN]	2	1
Q9Y5K6	CD2-associated protein OS=Homo sapiens GN=CD2AP PE=1 SV=1 - [CD2AP_HUMAN]	2
Q9Y6X3	MAU2 chromatid cohesion factor homolog OS=Homo sapiens GN=MAU2 PE=1 SV=2 - [SCC4_HUMAN]	2	1
S4R320	Phosphatidylinositol 5-phosphate 4-kinase type-2 alpha (Fragment) OS=Homo sapiens GN=PIP4K2A PE=1 SV=1 - [S4R320_HUMAN]	2	1
X6RDA4	Paraspeckle component 1 (Fragment) OS=Homo sapiens GN=PSPC1 PE=1 SV=1 - [X6RDA4_HUMAN]	2
A0A075B6N2	Protein TRBV20-1 (Fragment) OS=Homo sapiens GN=TRBV20-1 PE=4 SV=1 - [A0A075B6N2_HUMAN]	1
A0A087WT34	Methyl-CpG-binding domain protein 3 (Fragment) OS=Homo sapiens GN=MBD3 PE=1 SV=1 - [A0A087WT34_HUMAN]	1	1
A0A087WU26	Ribosome-binding protein 1 OS=Homo sapiens GN=RRBP1 PE=1 SV=1 - [A0A087WU26_HUMAN]	1
A0A087WUH9	Serine/threonine-protein kinase PLK OS=Homo sapiens GN=PLK2 PE=1 SV=1 - [A0A087WUH9_HUMAN]	1
A0A087WUU9	Zinc finger protein 36, C3H1 type-like 2 OS=Homo sapiens GN=ZFP36L2 PE=1 SV=1 - [A0A087WUU9_HUMAN]	1
A0A087WZJ2	Neuroblastoma breakpoint family member 14 OS=Homo sapiens GN=NBPF14 PE=4 SV=1 - [A0A087WZJ2_HUMAN]	1
A0A087WZZ5	Splicing factor 3B subunit 2 OS=Homo sapiens GN=SF3B2 PE=1 SV=1 - [A0A087WZZ5_HUMAN]	1	3
A0A087X1B2	U4/U6.U5 tri-snRNP-associated protein 2 OS=Homo sapiens GN=USP39 PE=1 SV=1 - [A0A087X1B2_HUMAN]	1
A0A087X2D0	Serine/arginine-rich-splicing factor 3 OS=Homo sapiens GN=SRSF3 PE=1 SV=1 - [A0A087X2D0_HUMAN]	1
A0A0A0MRN4	DBIRD complex subunit ZNF326 OS=Homo sapiens GN=ZNF326 PE=1 SV=1 - [A0A0A0MRN4_HUMAN]	1
A0A0A0MSJ2	Arf-GAP with Rho-GAP domain, ANK repeat and PH domain-containing protein 1 OS=Homo sapiens GN=ARAP1 PE=1 SV=1 - [A0A0A0MSJ2_HUMAN]	1
A0A0A0MSZ9	Cleavage stimulation factor subunit 1 (Fragment) OS=Homo sapiens GN=CSTF1 PE=1 SV=1 - [A0A0A0MSZ9_HUMAN]	1
A0A0A0MTN7	Interleukin-12 receptor subunit beta-2 OS=Homo sapiens GN=IL12RB2 PE=4 SV=1 - [A0A0A0MTN7_HUMAN]	1
A0A0A6YYC7	HCG2042749, isoform CRA_d OS=Homo sapiens GN=ZFP91-CNTF PE=4 SV=1 - [A0A0A6YYC7_HUMAN]	1
A0A0C4DFU6	Sorting nexin-27 OS=Homo sapiens GN=SNX27 PE=1 SV=1 - [A0A0C4DFU6_HUMAN]	1
A0A0C4DG33	Peroxisome biogenesis factor 1 OS=Homo sapiens GN=PEX1 PE=1 SV=1 - [A0A0C4DG33_HUMAN]	1
A0A0C4DG68	Pumilio homolog 2 (Fragment) OS=Homo sapiens GN=PUM2 PE=1 SV=1 - [A0A0C4DG68_HUMAN]	1
A0A0C4DG98	THO complex subunit 2 OS=Homo sapiens GN=THOC2 PE=1 SV=1 - [A0A0C4DG98_HUMAN]	1	1
A0A0C4DGS1	Dolichyl-diphosphooligosaccharide--protein glycosyltransferase 48 kDa subunit OS=Homo sapiens GN=DDOST PE=1 SV=1 - [A0A0C4DGS1_HUMAN]	1	1
A0A0C4DGW6	UPF0600 protein C5orf51 OS=Homo sapiens GN=C5orf51 PE=1 SV=1 - [A0A0C4DGW6_HUMAN]	1	1
A0A0C4DH79	Round spermatid basic protein 1 OS=Homo sapiens GN=RSBN1 PE=1 SV=1 - [A0A0C4DH79_HUMAN]	1	2
A0A0G2JRI7	Lysophosphatidylcholine acyltransferase 1 OS=Homo sapiens GN=LPCAT1 PE=1 SV=1 - [A0A0G2JRI7_HUMAN]	1
A0A0J9YYD9	Uncharacterized protein (Fragment) OS=Homo sapiens PE=4 SV=1 - [A0A0J9YYD9_HUMAN]	1
A6NIH7	Protein unc-119 homolog B OS=Homo sapiens GN=UNC119B PE=1 SV=1 - [U119B_HUMAN]	1
A6NJA2	Ubiquitin carboxyl-terminal hydrolase 14 OS=Homo sapiens GN=USP14 PE=1 SV=2 - [A6NJA2_HUMAN]	1
A8MVM7	Putative uncharacterized protein ENSP00000382790 OS=Homo sapiens PE=5 SV=3 - [YD021_HUMAN]	1
B0QY29	Protein FAM118A OS=Homo sapiens GN=FAM118A PE=1 SV=1 - [B0QY29_HUMAN]	1
B0QYA4	Eukaryotic translation initiation factor 3 subunit D (Fragment) OS=Homo sapiens GN=EIF3D PE=1 SV=2 - [B0QYA4_HUMAN]	1	1
B4DJ81	NADH-ubiquinone oxidoreductase 75 kDa subunit, mitochondrial OS=Homo sapiens GN=NDUFS1 PE=1 SV=1 - [B4DJ81_HUMAN]	1	4
B4DKA4	Elongator complex protein 3 OS=Homo sapiens GN=ELP3 PE=1 SV=1 - [B4DKA4_HUMAN]	1	1
B4DNV3	Interleukin-6 OS=Homo sapiens GN=IL6 PE=1 SV=1 - [B4DNV3_HUMAN]	1
B7Z5J4	Carboxypeptidase A4 OS=Homo sapiens GN=CPA4 PE=1 SV=1 - [B7Z5J4_HUMAN]	1	1
B8ZZ81	Alkyldihydroxyacetonephosphate synthase, peroxisomal OS=Homo sapiens GN=AGPS PE=1 SV=1 - [B8ZZ81_HUMAN]	1
C9J0C0	TRAF3-interacting JNK-activating modulator (Fragment) OS=Homo sapiens GN=TRAF3IP3 PE=1 SV=1 - [C9J0C0_HUMAN]	1	3
C9J1Z8	ADP-ribosylation factor 5 (Fragment) OS=Homo sapiens GN=ARF5 PE=1 SV=1 - [C9J1Z8_HUMAN]	1	1
C9J808	MKI67 FHA domain-interacting nucleolar phosphoprotein (Fragment) OS=Homo sapiens GN=NIFK PE=1 SV=6 - [C9J808_HUMAN]	1
C9J8U2	Nicotinate phosphoribosyltransferase OS=Homo sapiens GN=NAPRT PE=1 SV=1 - [C9J8U2_HUMAN]	1
C9J9P7	RNA-binding protein 5 (Fragment) OS=Homo sapiens GN=RBM5 PE=1 SV=1 - [C9J9P7_HUMAN]	1
C9JA17	V-type proton ATPase catalytic subunit A (Fragment) OS=Homo sapiens GN=ATP6V1A PE=1 SV=6 - [C9JA17_HUMAN]	1
C9JB90	Ras-related protein Rab-6B (Fragment) OS=Homo sapiens GN=RAB6B PE=4 SV=1 - [C9JB90_HUMAN]	1	1
C9JCR1	N-lysine methyltransferase SETD6 (Fragment) OS=Homo sapiens GN=SETD6 PE=1 SV=6 - [C9JCR1_HUMAN]	1
C9JHW1	PERQ amino acid-rich with GYF domain-containing protein 2 (Fragment) OS=Homo sapiens GN=GIGYF2 PE=1 SV=1 - [C9JHW1_HUMAN]	1	1
C9JI91	E3 ubiquitin-protein ligase TRIM56 (Fragment) OS=Homo sapiens GN=TRIM56 PE=1 SV=1 - [C9JI91_HUMAN]	1
C9JIU5	E3 ubiquitin-protein ligase TRIM22 (Fragment) OS=Homo sapiens GN=TRIM22 PE=1 SV=1 - [C9JIU5_HUMAN]	1
C9JJZ7	Heterogeneous nuclear ribonucleoprotein L-like (Fragment) OS=Homo sapiens GN=HNRNPLL PE=1 SV=1 - [C9JJZ7_HUMAN]	1
C9JL85	Myotrophin OS=Homo sapiens GN=MTPN PE=1 SV=1 - [C9JL85_HUMAN]	1
C9JLS9	26S protease regulatory subunit 7 (Fragment) OS=Homo sapiens GN=PSMC2 PE=1 SV=1 - [C9JLS9_HUMAN]	1
C9JU34	Ras-responsive element-binding protein 1 (Fragment) OS=Homo sapiens GN=RREB1 PE=1 SV=1 - [C9JU34_HUMAN]	1
C9JVB6	Mitochondrial ribonuclease P protein 1 (Fragment) OS=Homo sapiens GN=TRMT10C PE=1 SV=1 - [C9JVB6_HUMAN]	1	1
C9JWG0	UTP--glucose-1-phosphate uridylyltransferase (Fragment) OS=Homo sapiens GN=UGP2 PE=1 SV=1 - [C9JWG0_HUMAN]	1	1
C9JYW1	Unconventional myosin-Ib (Fragment) OS=Homo sapiens GN=MYO1B PE=1 SV=1 - [C9JYW1_HUMAN]	1
D6RAE9	Sideroflexin-1 OS=Homo sapiens GN=SFXN1 PE=1 SV=1 - [D6RAE9_HUMAN]	1	1
D6RAF2	Poly(A) RNA polymerase GLD2 OS=Homo sapiens GN=PAPD4 PE=1 SV=1 - [D6RAF2_HUMAN]	1
D6RB24	Adaptin ear-binding coat-associated protein 2 OS=Homo sapiens GN=NECAP2 PE=1 SV=1 - [D6RB24_HUMAN]	1
D6RBF6	3-hydroxybutyrate dehydrogenase type 2 OS=Homo sapiens GN=BDH2 PE=1 SV=1 - [D6RBF6_HUMAN]	1
D6RDI2	Luc7-like protein 3 (Fragment) OS=Homo sapiens GN=LUC7L3 PE=1 SV=1 - [D6RDI2_HUMAN]	1	4
D6RDY4	Axonemal dynein light chain domain-containing protein 1 (Fragment) OS=Homo sapiens GN=AXDND1 PE=4 SV=1 - [D6RDY4_HUMAN]	1
D6RIS1	Histone-lysine N-methyltransferase NSD2 (Fragment) OS=Homo sapiens GN=WHSC1 PE=1 SV=1 - [D6RIS1_HUMAN]	1
E2QRD4	Protein MMS22-like OS=Homo sapiens GN=MMS22L PE=1 SV=1 - [E2QRD4_HUMAN]	1
E5RFX7	Proline synthase co-transcribed bacterial homolog protein (Fragment) OS=Homo sapiens GN=PROSC PE=1 SV=1 - [E5RFX7_HUMAN]	1
E5RGQ4	Pericentriolar material 1 protein (Fragment) OS=Homo sapiens GN=PCM1 PE=1 SV=1 - [E5RGQ4_HUMAN]	1
E5RHT6	ADP-ribosylation factor GTPase-activating protein 1 (Fragment) OS=Homo sapiens GN=ARFGAP1 PE=1 SV=2 - [E5RHT6_HUMAN]	1	2
E5RIW3	Tubulin-specific chaperone A OS=Homo sapiens GN=TBCA PE=1 SV=1 - [E5RIW3_HUMAN]	1
E7EPN9	Protein PRRC2C OS=Homo sapiens GN=PRRC2C PE=1 SV=1 - [E7EPN9_HUMAN]	1
E7ER32	MKL/myocardin-like protein 1 OS=Homo sapiens GN=MKL1 PE=1 SV=2 - [E7ER32_HUMAN]	1
E7EX40	Rab11 family-interacting protein 1 OS=Homo sapiens GN=RAB11FIP1 PE=1 SV=1 - [E7EX40_HUMAN]	1
E9PAR2	cAMP-responsive element modulator OS=Homo sapiens GN=CREM PE=1 SV=1 - [E9PAR2_HUMAN]	1
E9PC05	Integrin-linked kinase-associated serine/threonine phosphatase 2C (Fragment) OS=Homo sapiens GN=ILKAP PE=1 SV=1 - [E9PC05_HUMAN]	1
E9PD53	Structural maintenance of chromosomes protein OS=Homo sapiens GN=SMC4 PE=1 SV=1 - [E9PD53_HUMAN]	1
E9PKB5	Protein phosphatase 1A (Fragment) OS=Homo sapiens GN=PPM1A PE=1 SV=1 - [E9PKB5_HUMAN]	1
E9PKD2	Nuclear pore complex protein Nup214 (Fragment) OS=Homo sapiens GN=NUP214 PE=1 SV=1 - [E9PKD2_HUMAN]	1
E9PKH0	Receptor-type tyrosine-protein phosphatase C (Fragment) OS=Homo sapiens GN=PTPRC PE=1 SV=2 - [E9PKH0_HUMAN]	1	1
E9PLA7	Nuclear RNA export factor 1 (Fragment) OS=Homo sapiens GN=NXF1 PE=1 SV=1 - [E9PLA7_HUMAN]	1
E9PM04	DCN1-like protein OS=Homo sapiens GN=DCUN1D5 PE=1 SV=1 - [E9PM04_HUMAN]	1
E9PPJ9	Elongator complex protein 4 OS=Homo sapiens GN=ELP4 PE=1 SV=1 - [E9PPJ9_HUMAN]	1
E9PPU6	N-acetyl-D-glucosamine kinase (Fragment) OS=Homo sapiens GN=NAGK PE=1 SV=2 - [E9PPU6_HUMAN]	1
E9PS77	BSD domain-containing protein 1 (Fragment) OS=Homo sapiens GN=BSDC1 PE=1 SV=1 - [E9PS77_HUMAN]	1
F2Z2F3	Uncharacterized protein OS=Homo sapiens PE=4 SV=1 - [F2Z2F3_HUMAN]	1
F2Z2I2	6-phosphofructo-2-kinase/fructose-2,6-bisphosphatase 3 OS=Homo sapiens GN=PFKFB3 PE=1 SV=1 - [F2Z2I2_HUMAN]	1	2
F2Z2Y4	Pyridoxal kinase OS=Homo sapiens GN=PDXK PE=1 SV=1 - [F2Z2Y4_HUMAN]	1
F5GY17	Rap guanine nucleotide exchange factor-like 1 (Fragment) OS=Homo sapiens GN=RAPGEFL1 PE=4 SV=1 - [F5GY17_HUMAN]	1
F5H2T0	Elongator complex protein 1 OS=Homo sapiens GN=IKBKAP PE=1 SV=1 - [F5H2T0_HUMAN]	1	2
F5H4F1	Cell cycle checkpoint control protein RAD9A (Fragment) OS=Homo sapiens GN=RAD9A PE=1 SV=1 - [F5H4F1_HUMAN]	1
F5H4S8	Nuclear factor of-activated T-cells, cytoplasmic 1 OS=Homo sapiens GN=NFATC1 PE=1 SV=1 - [F5H4S8_HUMAN]	1
F5H6J5	Zinc finger CCHC domain-containing protein 8 (Fragment) OS=Homo sapiens GN=ZCCHC8 PE=1 SV=1 - [F5H6J5_HUMAN]	1
F5H716	GTP-binding protein 1 (Fragment) OS=Homo sapiens GN=GTPBP1 PE=1 SV=1 - [F5H716_HUMAN]	1
F6UYG0	Serine/threonine-protein kinase WNK1 OS=Homo sapiens GN=WNK1 PE=1 SV=1 - [F6UYG0_HUMAN]	1
F8VNZ9	Diacylglycerol kinase alpha (Fragment) OS=Homo sapiens GN=DGKA PE=1 SV=1 - [F8VNZ9_HUMAN]	1
F8VR84	UPF0160 protein MYG1, mitochondrial OS=Homo sapiens GN=C12orf10 PE=1 SV=1 - [F8VR84_HUMAN]	1
F8VRX1	Rap guanine nucleotide exchange factor 3 OS=Homo sapiens GN=RAPGEF3 PE=1 SV=1 - [F8VRX1_HUMAN]	1
F8VTR6	Rab-3A-interacting protein OS=Homo sapiens GN=RAB3IP PE=1 SV=1 - [F8VTR6_HUMAN]	1
F8VUA6	60S ribosomal protein L18 (Fragment) OS=Homo sapiens GN=RPL18 PE=1 SV=1 - [F8VUA6_HUMAN]	1	1
F8W733	BRCA1-A complex subunit BRE (Fragment) OS=Homo sapiens GN=BRE PE=1 SV=1 - [F8W733_HUMAN]	1
F8W9B8	Exocyst complex component 5 OS=Homo sapiens GN=EXOC5 PE=1 SV=1 - [F8W9B8_HUMAN]	1
F8WAW4	Enoyl-CoA delta isomerase 2, mitochondrial OS=Homo sapiens GN=ECI2 PE=1 SV=1 - [F8WAW4_HUMAN]	1
F8WC75	[Pyruvate dehydrogenase (acetyl-transferring)] kinase isozyme 1, mitochondrial OS=Homo sapiens GN=PDK1 PE=1 SV=1 - [F8WC75_HUMAN]	1	1
G3V360	Rho GTPase-activating protein 5 (Fragment) OS=Homo sapiens GN=ARHGAP5 PE=1 SV=1 - [G3V360_HUMAN]	1
G3V3T3	Apoptotic chromatin condensation inducer in the nucleus (Fragment) OS=Homo sapiens GN=ACIN1 PE=1 SV=1 - [G3V3T3_HUMAN]	1	1
G3V448	Thioredoxin-related transmembrane protein 1 OS=Homo sapiens GN=TMX1 PE=1 SV=1 - [G3V448_HUMAN]	1
G3V459	Serine/threonine-protein kinase Nek9 OS=Homo sapiens GN=NEK9 PE=1 SV=1 - [G3V459_HUMAN]	1
G3V5B3	ERO1-like protein alpha (Fragment) OS=Homo sapiens GN=ERO1A PE=1 SV=1 - [G3V5B3_HUMAN]	1
G5E953	Myotubularin related protein 3, isoform CRA_e OS=Homo sapiens GN=MTMR3 PE=1 SV=1 - [G5E953_HUMAN]	1
G5E9W3	Cleavage and polyadenylation specific factor 3, 73kDa, isoform CRA_b OS=Homo sapiens GN=CPSF3 PE=1 SV=1 - [G5E9W3_HUMAN]	1	1
G5EA18	Double-stranded RNA-binding protein Staufen homolog 2 OS=Homo sapiens GN=STAU2 PE=1 SV=1 - [G5EA18_HUMAN]	1	4
H0Y3K4	RNA-binding protein 33 (Fragment) OS=Homo sapiens GN=RBM33 PE=1 SV=1 - [H0Y3K4_HUMAN]	1
H0Y5G9	Nardilysin (Fragment) OS=Homo sapiens GN=NRD1 PE=1 SV=1 - [H0Y5G9_HUMAN]	1
H0Y6Z4	Protein-methionine sulfoxide oxidase MICAL1 (Fragment) OS=Homo sapiens GN=MICAL1 PE=1 SV=1 - [H0Y6Z4_HUMAN]	1
H0Y7V4	Dynein heavy chain 8, axonemal OS=Homo sapiens GN=DNAH8 PE=1 SV=1 - [H0Y7V4_HUMAN]	1		1
H0Y8D1	Trypsin-1 (Fragment) OS=Homo sapiens GN=PRSS1 PE=1 SV=1 - [H0Y8D1_HUMAN]	1	4	2
H0Y9M9	C-terminal-binding protein 1 (Fragment) OS=Homo sapiens GN=CTBP1 PE=1 SV=1 - [H0Y9M9_HUMAN]	1
H0Y9P1	BMP-2-inducible protein kinase (Fragment) OS=Homo sapiens GN=BMP2K PE=1 SV=1 - [H0Y9P1_HUMAN]	1
H0Y9X5	Endoplasmic reticulum aminopeptidase 1 (Fragment) OS=Homo sapiens GN=ERAP1 PE=1 SV=1 - [H0Y9X5_HUMAN]	1
H0YBB4	E3 ubiquitin-protein ligase UBR5 (Fragment) OS=Homo sapiens GN=UBR5 PE=1 SV=6 - [H0YBB4_HUMAN]	1
H0YC73	La-related protein 1 (Fragment) OS=Homo sapiens GN=LARP1 PE=1 SV=1 - [H0YC73_HUMAN]	1
H0YC91	Spermatid perinuclear RNA-binding protein (Fragment) OS=Homo sapiens GN=STRBP PE=1 SV=1 - [H0YC91_HUMAN]	1
H0YE69	Protein Hook homolog 3 (Fragment) OS=Homo sapiens GN=HOOK3 PE=1 SV=1 - [H0YE69_HUMAN]	1
H0YEW4	ATP synthase mitochondrial F1 complex assembly factor 1 (Fragment) OS=Homo sapiens GN=ATPAF1 PE=1 SV=1 - [H0YEW4_HUMAN]	1	1
H0YG96	Ubiquitin carboxyl-terminal hydrolase 28 (Fragment) OS=Homo sapiens GN=USP28 PE=1 SV=1 - [H0YG96_HUMAN]	1
H0YH81	ATP synthase subunit beta (Fragment) OS=Homo sapiens GN=ATP5B PE=1 SV=1 - [H0YH81_HUMAN]	1
H0YJ34	Fermitin family homolog 2 (Fragment) OS=Homo sapiens GN=FERMT2 PE=1 SV=1 - [H0YJ34_HUMAN]	1	1
H0YJ63	Activator of 90 kDa heat shock protein ATPase homolog 1 (Fragment) OS=Homo sapiens GN=AHSA1 PE=1 SV=1 - [H0YJ63_HUMAN]	1	2
H0YJB9	UPF0568 protein C14orf166 (Fragment) OS=Homo sapiens GN=C14orf166 PE=1 SV=1 - [H0YJB9_HUMAN]	1
H0YJV9	Pecanex-like protein 4 (Fragment) OS=Homo sapiens GN=PCNXL4 PE=4 SV=1 - [H0YJV9_HUMAN]	1
H0YKB3	Sorbitol dehydrogenase OS=Homo sapiens GN=SORD PE=1 SV=1 - [H0YKB3_HUMAN]	1
H0YL12	Electron transfer flavoprotein subunit alpha, mitochondrial (Fragment) OS=Homo sapiens GN=ETFA PE=1 SV=6 - [H0YL12_HUMAN]	1
H0YMJ4	Kinesin-like protein KIF23 OS=Homo sapiens GN=KIF23 PE=1 SV=2 - [H0YMJ4_HUMAN]	1
H0YMZ5	GA-binding protein subunit beta-1 (Fragment) OS=Homo sapiens GN=GABPB1 PE=1 SV=1 - [H0YMZ5_HUMAN]	1
H0YNA1	Protein FAM98B (Fragment) OS=Homo sapiens GN=FAM98B PE=1 SV=1 - [H0YNA1_HUMAN]	1
H3BPG7	Anamorsin OS=Homo sapiens GN=CIAPIN1 PE=1 SV=1 - [H3BPG7_HUMAN]	1
H3BRR2	DNA-directed RNA polymerase II subunit RPB3 OS=Homo sapiens GN=POLR2C PE=1 SV=1 - [H3BRR2_HUMAN]	1
H3BRY6	von Willebrand factor A domain-containing protein 9 OS=Homo sapiens GN=VWA9 PE=1 SV=1 - [H3BRY6_HUMAN]	1	1
H3BST5	Mitochondrial Rho GTPase 2 (Fragment) OS=Homo sapiens GN=RHOT2 PE=1 SV=2 - [H3BST5_HUMAN]	1
H3BUU8	Protein VAC14 homolog OS=Homo sapiens GN=VAC14 PE=1 SV=1 - [H3BUU8_HUMAN]	1
H7BZF2	H/ACA ribonucleoprotein complex subunit 4 (Fragment) OS=Homo sapiens GN=DKC1 PE=1 SV=1 - [H7BZF2_HUMAN]	1	1
H7C2R7	Spermine synthase (Fragment) OS=Homo sapiens GN=SMS PE=1 SV=1 - [H7C2R7_HUMAN]	1
H7C306	Remodeling and spacing factor 1 (Fragment) OS=Homo sapiens GN=RSF1 PE=1 SV=1 - [H7C306_HUMAN]	1	1
H7C3T4	Peroxiredoxin-4 (Fragment) OS=Homo sapiens GN=PRDX4 PE=1 SV=1 - [H7C3T4_HUMAN]	1	5
H7C3W1	Non-syndromic hearing impairment protein 5 (Fragment) OS=Homo sapiens GN=DFNA5 PE=1 SV=1 - [H7C3W1_HUMAN]	1
H7C415	Condensin complex subunit 2 (Fragment) OS=Homo sapiens GN=NCAPH PE=1 SV=1 - [H7C415_HUMAN]	1	2
H7C463	MICOS complex subunit MIC60 (Fragment) OS=Homo sapiens GN=IMMT PE=1 SV=1 - [H7C463_HUMAN]	1	6
H7C4H2	Signal recognition particle receptor subunit beta (Fragment) OS=Homo sapiens GN=SRPRB PE=1 SV=1 - [H7C4H2_HUMAN]	1	1
H7C519	5'-nucleotidase domain-containing protein 2 (Fragment) OS=Homo sapiens GN=NT5DC2 PE=1 SV=1 - [H7C519_HUMAN]	1
H7C5Q2	Acyl-coenzyme A thioesterase 9, mitochondrial (Fragment) OS=Homo sapiens GN=ACOT9 PE=1 SV=1 - [H7C5Q2_HUMAN]	1
I3L0J9	Pre-mRNA-processing-splicing factor 8 (Fragment) OS=Homo sapiens GN=PRPF8 PE=1 SV=6 - [I3L0J9_HUMAN]	1	1
I3L1E8	Mitochondrial dicarboxylate carrier (Fragment) OS=Homo sapiens GN=SLC25A10 PE=3 SV=1 - [I3L1E8_HUMAN]	1
I3L1I5	Putative uncharacterized protein LOC100996504 OS=Homo sapiens PE=5 SV=1 - [YS060_HUMAN]	1
I3L1L3	Myb-binding protein 1A (Fragment) OS=Homo sapiens GN=MYBBP1A PE=1 SV=1 - [I3L1L3_HUMAN]	1	1
I3L1Q3	Elongator complex protein 5 (Fragment) OS=Homo sapiens GN=ELP5 PE=1 SV=1 - [I3L1Q3_HUMAN]	1
I3L254	Transcription factor AP-4 (Fragment) OS=Homo sapiens GN=TFAP4 PE=1 SV=1 - [I3L254_HUMAN]	1
I3L4P1	Proline-, glutamic acid- and leucine-rich protein 1 (Fragment) OS=Homo sapiens GN=PELP1 PE=1 SV=6 - [I3L4P1_HUMAN]	1	1
J3KQ34	COP9 signalosome complex subunit 7b OS=Homo sapiens GN=COPS7B PE=1 SV=1 - [J3KQ34_HUMAN]	1	3
J3KRG2	Gasdermin-A (Fragment) OS=Homo sapiens GN=GSDMA PE=1 SV=6 - [J3KRG2_HUMAN]	1
J3KTB7	DNA topoisomerase 2 (Fragment) OS=Homo sapiens GN=TOP2A PE=1 SV=1 - [J3KTB7_HUMAN]	1
J3QKX0	Fanconi anemia group J protein (Fragment) OS=Homo sapiens GN=BRIP1 PE=1 SV=1 - [J3QKX0_HUMAN]	1
J3QQW9	Polycomb protein SUZ12 OS=Homo sapiens GN=SUZ12 PE=1 SV=1 - [J3QQW9_HUMAN]	1	1
J3QQX0	COP9 signalosome complex subunit 1 (Fragment) OS=Homo sapiens GN=GPS1 PE=1 SV=1 - [J3QQX0_HUMAN]	1
K7EIQ7	Mitochondrial Rho GTPase 1 (Fragment) OS=Homo sapiens GN=RHOT1 PE=1 SV=1 - [K7EIQ7_HUMAN]	1
K7EKE5	Tubulin gamma-1 chain OS=Homo sapiens GN=TUBG1 PE=4 SV=1 - [K7EKE5_HUMAN]	1
K7EKS6	Mediator of RNA polymerase II transcription subunit 16 (Fragment) OS=Homo sapiens GN=MED16 PE=1 SV=1 - [K7EKS6_HUMAN]	1
K7EL66	Microtubule-associated protein RP/EB family member 2 (Fragment) OS=Homo sapiens GN=MAPRE2 PE=1 SV=1 - [K7EL66_HUMAN]	1
K7ELG0	Sperm-associated antigen 5 (Fragment) OS=Homo sapiens GN=SPAG5 PE=1 SV=1 - [K7ELG0_HUMAN]	1
K7EMH3	DNA-directed RNA polymerase, mitochondrial (Fragment) OS=Homo sapiens GN=POLRMT PE=1 SV=4 - [K7EMH3_HUMAN]	1
K7EMM8	Putative oxidoreductase GLYR1 (Fragment) OS=Homo sapiens GN=GLYR1 PE=1 SV=2 - [K7EMM8_HUMAN]	1	3
K7EP06	mRNA cap guanine-N7 methyltransferase OS=Homo sapiens GN=RNMT PE=1 SV=1 - [K7EP06_HUMAN]	1	1
K7EP07	Tubulin-folding cofactor B (Fragment) OS=Homo sapiens GN=TBCB PE=1 SV=6 - [K7EP07_HUMAN]	1
K7EQ61	HAUS augmin-like complex subunit 5 (Fragment) OS=Homo sapiens GN=HAUS5 PE=1 SV=2 - [K7EQ61_HUMAN]	1
K7ERN7	Notchless protein homolog 1 OS=Homo sapiens GN=NLE1 PE=1 SV=1 - [K7ERN7_HUMAN]	1	1
M0QYL4	A-kinase anchor protein 8 (Fragment) OS=Homo sapiens GN=AKAP8 PE=1 SV=2 - [M0QYL4_HUMAN]	1
M0QZK8	Uncharacterized protein OS=Homo sapiens PE=4 SV=1 - [M0QZK8_HUMAN]	1
M0R0P4	Striatin-4 (Fragment) OS=Homo sapiens GN=STRN4 PE=1 SV=2 - [M0R0P4_HUMAN]	1	2
M0R0P7	60S ribosomal protein L18a OS=Homo sapiens GN=RPL18A PE=1 SV=1 - [M0R0P7_HUMAN]	1
M0R389	Platelet-activating factor acetylhydrolase IB subunit gamma (Fragment) OS=Homo sapiens GN=PAFAH1B3 PE=1 SV=6 - [M0R389_HUMAN]	1	2
M0R3C7	Symplekin OS=Homo sapiens GN=SYMPK PE=1 SV=1 - [M0R3C7_HUMAN]	1
O14967	Calmegin OS=Homo sapiens GN=CLGN PE=1 SV=1 - [CLGN_HUMAN]	1	1
O14976	Cyclin-G-associated kinase OS=Homo sapiens GN=GAK PE=1 SV=2 - [GAK_HUMAN]	1
O15111	Inhibitor of nuclear factor kappa-B kinase subunit alpha OS=Homo sapiens GN=CHUK PE=1 SV=2 - [IKKA_HUMAN]	1
O15265	Ataxin-7 OS=Homo sapiens GN=ATXN7 PE=1 SV=1 - [ATX7_HUMAN]	1
O15446	DNA-directed RNA polymerase I subunit RPA34 OS=Homo sapiens GN=CD3EAP PE=1 SV=1 - [RPA34_HUMAN]	1
O43242	26S proteasome non-ATPase regulatory subunit 3 OS=Homo sapiens GN=PSMD3 PE=1 SV=2 - [PSMD3_HUMAN]	1
O43252	Bifunctional 3'-phosphoadenosine 5'-phosphosulfate synthase 1 OS=Homo sapiens GN=PAPSS1 PE=1 SV=2 - [PAPS1_HUMAN]	1
O60264	SWI/SNF-related matrix-associated actin-dependent regulator of chromatin subfamily A member 5 OS=Homo sapiens GN=SMARCA5 PE=1 SV=1 - [SMCA5_HUMAN]	1	2
O60336	Mitogen-activated protein kinase-binding protein 1 OS=Homo sapiens GN=MAPKBP1 PE=1 SV=4 - [MABP1_HUMAN]	1
O60547	GDP-mannose 4,6 dehydratase OS=Homo sapiens GN=GMDS PE=1 SV=1 - [GMDS_HUMAN]	1	1
O60763	General vesicular transport factor p115 OS=Homo sapiens GN=USO1 PE=1 SV=2 - [USO1_HUMAN]	1	3
O75717	WD repeat and HMG-box DNA-binding protein 1 OS=Homo sapiens GN=WDHD1 PE=1 SV=1 - [WDHD1_HUMAN]	1	2
O95239	Chromosome-associated kinesin KIF4A OS=Homo sapiens GN=KIF4A PE=1 SV=3 - [KIF4A_HUMAN]	1
O95347	Structural maintenance of chromosomes protein 2 OS=Homo sapiens GN=SMC2 PE=1 SV=2 - [SMC2_HUMAN]	1	3
O95400	CD2 antigen cytoplasmic tail-binding protein 2 OS=Homo sapiens GN=CD2BP2 PE=1 SV=1 - [CD2B2_HUMAN]	1
O95425	Supervillin OS=Homo sapiens GN=SVIL PE=1 SV=2 - [SVIL_HUMAN]	1
O95782	AP-2 complex subunit alpha-1 OS=Homo sapiens GN=AP2A1 PE=1 SV=3 - [AP2A1_HUMAN]	1
P04040	Catalase OS=Homo sapiens GN=CAT PE=1 SV=3 - [CATA_HUMAN]	1	2
P05023	Sodium/potassium-transporting ATPase subunit alpha-1 OS=Homo sapiens GN=ATP1A1 PE=1 SV=1 - [AT1A1_HUMAN]	1
P08047	Transcription factor Sp1 OS=Homo sapiens GN=SP1 PE=1 SV=3 - [SP1_HUMAN]	1	1
P0DJD0	RANBP2-like and GRIP domain-containing protein 1 OS=Homo sapiens GN=RGPD1 PE=2 SV=1 - [RGPD1_HUMAN]	1
P11166	Solute carrier family 2, facilitated glucose transporter member 1 OS=Homo sapiens GN=SLC2A1 PE=1 SV=2 - [GTR1_HUMAN]	1
P11216	Glycogen phosphorylase, brain form OS=Homo sapiens GN=PYGB PE=1 SV=5 - [PYGB_HUMAN]	1	1
P12273	Prolactin-inducible protein OS=Homo sapiens GN=PIP PE=1 SV=1 - [PIP_HUMAN]	1		1
P20073	Annexin A7 OS=Homo sapiens GN=ANXA7 PE=1 SV=3 - [ANXA7_HUMAN]	1	1
P26373	60S ribosomal protein L13 OS=Homo sapiens GN=RPL13 PE=1 SV=4 - [RL13_HUMAN]	1	2
P28072	Proteasome subunit beta type-6 OS=Homo sapiens GN=PSMB6 PE=1 SV=4 - [PSB6_HUMAN]	1
P28288	ATP-binding cassette sub-family D member 3 OS=Homo sapiens GN=ABCD3 PE=1 SV=1 - [ABCD3_HUMAN]	1
P28482	Mitogen-activated protein kinase 1 OS=Homo sapiens GN=MAPK1 PE=1 SV=3 - [MK01_HUMAN]	1
P30050	60S ribosomal protein L12 OS=Homo sapiens GN=RPL12 PE=1 SV=1 - [RL12_HUMAN]	1	1
P30086	Phosphatidylethanolamine-binding protein 1 OS=Homo sapiens GN=PEBP1 PE=1 SV=3 - [PEBP1_HUMAN]	1
P31749	RAC-alpha serine/threonine-protein kinase OS=Homo sapiens GN=AKT1 PE=1 SV=2 - [AKT1_HUMAN]	1
P31930	Cytochrome b-c1 complex subunit 1, mitochondrial OS=Homo sapiens GN=UQCRC1 PE=1 SV=3 - [QCR1_HUMAN]	1
P35243	Recoverin OS=Homo sapiens GN=RCVRN PE=1 SV=2 - [RECO_HUMAN]	1
P35251	Replication factor C subunit 1 OS=Homo sapiens GN=RFC1 PE=1 SV=4 - [RFC1_HUMAN]	1
P38117	Electron transfer flavoprotein subunit beta OS=Homo sapiens GN=ETFB PE=1 SV=3 - [ETFB_HUMAN]	1
P40222	Alpha-taxilin OS=Homo sapiens GN=TXLNA PE=1 SV=3 - [TXLNA_HUMAN]	1	1
P42285	Superkiller viralicidic activity 2-like 2 OS=Homo sapiens GN=SKIV2L2 PE=1 SV=3 - [SK2L2_HUMAN]	1
P43007	Neutral amino acid transporter A OS=Homo sapiens GN=SLC1A4 PE=1 SV=1 - [SATT_HUMAN]	1
P43897	Elongation factor Ts, mitochondrial OS=Homo sapiens GN=TSFM PE=1 SV=2 - [EFTS_HUMAN]	1
P46531	Neurogenic locus notch homolog protein 1 OS=Homo sapiens GN=NOTCH1 PE=1 SV=4 - [NOTC1_HUMAN]	1
P47914	60S ribosomal protein L29 OS=Homo sapiens GN=RPL29 PE=1 SV=2 - [RL29_HUMAN]	1	1
P51809	Vesicle-associated membrane protein 7 OS=Homo sapiens GN=VAMP7 PE=1 SV=3 - [VAMP7_HUMAN]	1
P51970	NADH dehydrogenase [ubiquinone] 1 alpha subcomplex subunit 8 OS=Homo sapiens GN=NDUFA8 PE=1 SV=3 - [NDUA8_HUMAN]	1
P53384	Cytosolic Fe-S cluster assembly factor NUBP1 OS=Homo sapiens GN=NUBP1 PE=1 SV=2 - [NUBP1_HUMAN]	1
P55010	Eukaryotic translation initiation factor 5 OS=Homo sapiens GN=EIF5 PE=1 SV=2 - [IF5_HUMAN]	1	1
P55212	Caspase-6 OS=Homo sapiens GN=CASP6 PE=1 SV=2 - [CASP6_HUMAN]	1
P55268	Laminin subunit beta-2 OS=Homo sapiens GN=LAMB2 PE=1 SV=2 - [LAMB2_HUMAN]	1
P55884	Eukaryotic translation initiation factor 3 subunit B OS=Homo sapiens GN=EIF3B PE=1 SV=3 - [EIF3B_HUMAN]	1
P57081	tRNA (guanine-N(7)-)-methyltransferase non-catalytic subunit WDR4 OS=Homo sapiens GN=WDR4 PE=1 SV=2 - [WDR4_HUMAN]	1
P62854	40S ribosomal protein S26 OS=Homo sapiens GN=RPS26 PE=1 SV=3 - [RS26_HUMAN]	1
P82979	SAP domain-containing ribonucleoprotein OS=Homo sapiens GN=SARNP PE=1 SV=3 - [SARNP_HUMAN]	1	1
Q04864	Proto-oncogene c-Rel OS=Homo sapiens GN=REL PE=1 SV=1 - [REL_HUMAN]	1
Q08AF3	Schlafen family member 5 OS=Homo sapiens GN=SLFN5 PE=1 SV=1 - [SLFN5_HUMAN]	1	3
Q09161	Nuclear cap-binding protein subunit 1 OS=Homo sapiens GN=NCBP1 PE=1 SV=1 - [NCBP1_HUMAN]	1	2
Q0VDF9	Heat shock 70 kDa protein 14 OS=Homo sapiens GN=HSPA14 PE=1 SV=1 - [HSP7E_HUMAN]	1
Q13111	Chromatin assembly factor 1 subunit A OS=Homo sapiens GN=CHAF1A PE=1 SV=2 - [CAF1A_HUMAN]	1	3
Q14202	Zinc finger MYM-type protein 3 OS=Homo sapiens GN=ZMYM3 PE=1 SV=2 - [ZMYM3_HUMAN]	1
Q14204	Cytoplasmic dynein 1 heavy chain 1 OS=Homo sapiens GN=DYNC1H1 PE=1 SV=5 - [DYHC1_HUMAN]	1	2
Q14289	Protein-tyrosine kinase 2-beta OS=Homo sapiens GN=PTK2B PE=1 SV=2 - [FAK2_HUMAN]	1
Q14684	Ribosomal RNA processing protein 1 homolog B OS=Homo sapiens GN=RRP1B PE=1 SV=3 - [RRP1B_HUMAN]	1	1
Q15050	Ribosome biogenesis regulatory protein homolog OS=Homo sapiens GN=RRS1 PE=1 SV=2 - [RRS1_HUMAN]	1
Q15375	Ephrin type-A receptor 7 OS=Homo sapiens GN=EPHA7 PE=1 SV=3 - [EPHA7_HUMAN]	1
Q15661	Tryptase alpha/beta-1 OS=Homo sapiens GN=TPSAB1 PE=1 SV=1 - [TRYB1_HUMAN]	1
Q15695	U2 small nuclear ribonucleoprotein auxiliary factor 35 kDa subunit-related protein 1 OS=Homo sapiens GN=ZRSR1 PE=2 SV=2 - [U2AFL_HUMAN]	1
Q2TAY7	WD40 repeat-containing protein SMU1 OS=Homo sapiens GN=SMU1 PE=1 SV=2 - [SMU1_HUMAN]	1	1
Q3B726	DNA-directed RNA polymerase I subunit RPA43 OS=Homo sapiens GN=TWISTNB PE=1 SV=1 - [RPA43_HUMAN]	1
Q3SXM5	Inactive hydroxysteroid dehydrogenase-like protein 1 OS=Homo sapiens GN=HSDL1 PE=1 SV=3 - [HSDL1_HUMAN]	1
Q4VB86	EPB41 protein OS=Homo sapiens GN=EPB41 PE=1 SV=2 - [Q4VB86_HUMAN]	1
Q5JSP0	FYVE, RhoGEF and PH domain-containing protein 3 OS=Homo sapiens GN=FGD3 PE=1 SV=1 - [FGD3_HUMAN]	1
Q5JXB2	Putative ubiquitin-conjugating enzyme E2 N-like OS=Homo sapiens GN=UBE2NL PE=1 SV=1 - [UE2NL_HUMAN]	1		1
Q5LJB0	Ubiquitin carboxyl-terminal hydrolase (Fragment) OS=Homo sapiens GN=UCHL5 PE=1 SV=1 - [Q5LJB0_HUMAN]	1	1
Q5QPE2	Protein transport protein Sec23B (Fragment) OS=Homo sapiens GN=SEC23B PE=1 SV=1 - [Q5QPE2_HUMAN]	1
Q5SRE5	Nucleoporin NUP188 homolog OS=Homo sapiens GN=NUP188 PE=1 SV=1 - [NU188_HUMAN]	1
Q5SRN1	Pre-mRNA-processing factor 17 OS=Homo sapiens GN=CDC40 PE=1 SV=1 - [Q5SRN1_HUMAN]	1
Q5T196	FAD synthase OS=Homo sapiens GN=FLAD1 PE=1 SV=1 - [Q5T196_HUMAN]	1
Q5T6H3	Xaa-Pro aminopeptidase 1 (Fragment) OS=Homo sapiens GN=XPNPEP1 PE=1 SV=1 - [Q5T6H3_HUMAN]	1
Q5T7F5	Cap-specific mRNA (nucleoside-2'-O-)-methyltransferase 1 (Fragment) OS=Homo sapiens GN=CMTR1 PE=1 SV=1 - [Q5T7F5_HUMAN]	1
Q5T8C6	Cell division cycle protein 16 homolog OS=Homo sapiens GN=CDC16 PE=1 SV=1 - [Q5T8C6_HUMAN]	1	1
Q5T8U3	60S ribosomal protein L7a (Fragment) OS=Homo sapiens GN=RPL7A PE=1 SV=1 - [Q5T8U3_HUMAN]	1	1
Q5T9Q8	Succinyl-CoA ligase [ADP-forming] subunit beta, mitochondrial (Fragment) OS=Homo sapiens GN=SUCLA2 PE=1 SV=1 - [Q5T9Q8_HUMAN]	1
Q5VUC6	Glycylpeptide N-tetradecanoyltransferase OS=Homo sapiens GN=NMT2 PE=1 SV=1 - [Q5VUC6_HUMAN]	1
Q5W075	Claudin-10 OS=Homo sapiens GN=CLDN10 PE=1 SV=1 - [Q5W075_HUMAN]	1
Q69YN2	CWF19-like protein 1 OS=Homo sapiens GN=CWF19L1 PE=1 SV=2 - [C19L1_HUMAN]	1	1
Q6P2P2	Putative protein arginine N-methyltransferase 9 OS=Homo sapiens GN=PRMT9 PE=2 SV=1 - [ANM9_HUMAN]	1
Q6PJ61	F-box only protein 46 OS=Homo sapiens GN=FBXO46 PE=1 SV=3 - [FBX46_HUMAN]	1
Q6ZUX3	Protein FAM179A OS=Homo sapiens GN=FAM179A PE=2 SV=2 - [F179A_HUMAN]	1
Q7L8L6	FAST kinase domain-containing protein 5 OS=Homo sapiens GN=FASTKD5 PE=1 SV=1 - [FAKD5_HUMAN]	1
Q7Z2Z2	Elongation factor Tu GTP-binding domain-containing protein 1 OS=Homo sapiens GN=EFTUD1 PE=1 SV=2 - [ETUD1_HUMAN]	1	1
Q7Z333	Probable helicase senataxin OS=Homo sapiens GN=SETX PE=1 SV=4 - [SETX_HUMAN]	1
Q86TB3	Alpha-protein kinase 2 OS=Homo sapiens GN=ALPK2 PE=2 SV=3 - [ALPK2_HUMAN]	1
Q86UQ8	Transcription factor NF-E4 OS=Homo sapiens GN=NFE4 PE=1 SV=1 - [NFE4_HUMAN]	1
Q86Y37	CDK2-associated and cullin domain-containing protein 1 OS=Homo sapiens GN=CACUL1 PE=1 SV=1 - [CACL1_HUMAN]	1
Q8IX07	Zinc finger protein ZFPM1 OS=Homo sapiens GN=ZFPM1 PE=1 SV=2 - [FOG1_HUMAN]	1
Q8N475	Follistatin-related protein 5 OS=Homo sapiens GN=FSTL5 PE=2 SV=2 - [FSTL5_HUMAN]	1
Q8NG76	Olfactory receptor 2T33 OS=Homo sapiens GN=OR2T33 PE=2 SV=1 - [O2T33_HUMAN]	1
Q8NGR3	Olfactory receptor 1K1 OS=Homo sapiens GN=OR1K1 PE=2 SV=1 - [OR1K1_HUMAN]	1
Q8NGZ0	Olfactory receptor 2AJ1 OS=Homo sapiens GN=OR2AJ1 PE=3 SV=1 - [O2AJ1_HUMAN]	1
Q8NHV4	Protein NEDD1 OS=Homo sapiens GN=NEDD1 PE=1 SV=1 - [NEDD1_HUMAN]	1	3
Q8TF21	Ankyrin repeat domain-containing protein 24 OS=Homo sapiens GN=ANKRD24 PE=2 SV=2 - [ANR24_HUMAN]	1
Q8TF46	DIS3-like exonuclease 1 OS=Homo sapiens GN=DIS3L PE=1 SV=2 - [DI3L1_HUMAN]	1
Q8WUT1	POLDIP3 protein OS=Homo sapiens GN=POLDIP3 PE=1 SV=1 - [Q8WUT1_HUMAN]	1
Q8WWK9	Cytoskeleton-associated protein 2 OS=Homo sapiens GN=CKAP2 PE=1 SV=1 - [CKAP2_HUMAN]	1	1
Q8WX92	Negative elongation factor B OS=Homo sapiens GN=NELFB PE=1 SV=1 - [NELFB_HUMAN]	1
Q8WXI9	Transcriptional repressor p66-beta OS=Homo sapiens GN=GATAD2B PE=1 SV=1 - [P66B_HUMAN]	1	4
Q8WYA6	Beta-catenin-like protein 1 OS=Homo sapiens GN=CTNNBL1 PE=1 SV=1 - [CTBL1_HUMAN]	1
Q92541	RNA polymerase-associated protein RTF1 homolog OS=Homo sapiens GN=RTF1 PE=1 SV=4 - [RTF1_HUMAN]	1
Q92882	Osteoclast-stimulating factor 1 OS=Homo sapiens GN=OSTF1 PE=1 SV=2 - [OSTF1_HUMAN]	1
Q92947	Glutaryl-CoA dehydrogenase, mitochondrial OS=Homo sapiens GN=GCDH PE=1 SV=1 - [GCDH_HUMAN]	1
Q969U7	Proteasome assembly chaperone 2 OS=Homo sapiens GN=PSMG2 PE=1 SV=1 - [PSMG2_HUMAN]	1
Q96GM8	Target of EGR1 protein 1 OS=Homo sapiens GN=TOE1 PE=1 SV=1 - [TOE1_HUMAN]	1	1
Q96GW9	Methionine--tRNA ligase, mitochondrial OS=Homo sapiens GN=MARS2 PE=1 SV=2 - [SYMM_HUMAN]	1
Q96I24	Far upstream element-binding protein 3 OS=Homo sapiens GN=FUBP3 PE=1 SV=2 - [FUBP3_HUMAN]	1	2
Q96PB1	CAS1 domain-containing protein 1 OS=Homo sapiens GN=CASD1 PE=2 SV=1 - [CASD1_HUMAN]	1
Q96PK6	RNA-binding protein 14 OS=Homo sapiens GN=RBM14 PE=1 SV=2 - [RBM14_HUMAN]	1	1
Q96PQ7	Kelch-like protein 5 OS=Homo sapiens GN=KLHL5 PE=2 SV=3 - [KLHL5_HUMAN]	1
Q96S59	Ran-binding protein 9 OS=Homo sapiens GN=RANBP9 PE=1 SV=1 - [RANB9_HUMAN]	1	1
Q96ST3	Paired amphipathic helix protein Sin3a OS=Homo sapiens GN=SIN3A PE=1 SV=2 - [SIN3A_HUMAN]	1	2
Q99541	Perilipin-2 OS=Homo sapiens GN=PLIN2 PE=1 SV=2 - [PLIN2_HUMAN]	1	1
Q99570	Phosphoinositide 3-kinase regulatory subunit 4 OS=Homo sapiens GN=PIK3R4 PE=1 SV=3 - [PI3R4_HUMAN]	1
Q99704	Docking protein 1 OS=Homo sapiens GN=DOK1 PE=1 SV=1 - [DOK1_HUMAN]	1
Q99836	Myeloid differentiation primary response protein MyD88 OS=Homo sapiens GN=MYD88 PE=1 SV=1 - [MYD88_HUMAN]	1
Q99961	Endophilin-A2 OS=Homo sapiens GN=SH3GL1 PE=1 SV=1 - [SH3G1_HUMAN]	1
Q9BVG4	Protein PBDC1 OS=Homo sapiens GN=PBDC1 PE=1 SV=1 - [PBDC1_HUMAN]	1	2
Q9BVP2	Guanine nucleotide-binding protein-like 3 OS=Homo sapiens GN=GNL3 PE=1 SV=2 - [GNL3_HUMAN]	1	1
Q9BWD1	Acetyl-CoA acetyltransferase, cytosolic OS=Homo sapiens GN=ACAT2 PE=1 SV=2 - [THIC_HUMAN]	1
Q9BXU2	Testis-expressed sequence 13B protein OS=Homo sapiens GN=TEX13B PE=2 SV=1 - [TX13B_HUMAN]	1
Q9BZX2	Uridine-cytidine kinase 2 OS=Homo sapiens GN=UCK2 PE=1 SV=1 - [UCK2_HUMAN]	1
Q9H2D6	TRIO and F-actin-binding protein OS=Homo sapiens GN=TRIOBP PE=1 SV=3 - [TARA_HUMAN]	1
Q9H3L0	Methylmalonic aciduria and homocystinuria type D protein, mitochondrial OS=Homo sapiens GN=MMADHC PE=1 SV=2 - [MMAD_HUMAN]	1
Q9H4L7	SWI/SNF-related matrix-associated actin-dependent regulator of chromatin subfamily A containing DEAD/H box 1 OS=Homo sapiens GN=SMARCAD1 PE=1 SV=2 - [SMRCD_HUMAN]	1	1
Q9H7Z6	Histone acetyltransferase KAT8 OS=Homo sapiens GN=KAT8 PE=1 SV=2 - [KAT8_HUMAN]	1
Q9HB90	Ras-related GTP-binding protein C OS=Homo sapiens GN=RRAGC PE=1 SV=1 - [RRAGC_HUMAN]	1
Q9HC38	Glyoxalase domain-containing protein 4 OS=Homo sapiens GN=GLOD4 PE=1 SV=1 - [GLOD4_HUMAN]	1	4
Q9NP61	ADP-ribosylation factor GTPase-activating protein 3 OS=Homo sapiens GN=ARFGAP3 PE=1 SV=1 - [ARFG3_HUMAN]	1
Q9NPB9	Atypical chemokine receptor 4 OS=Homo sapiens GN=ACKR4 PE=1 SV=1 - [ACKR4_HUMAN]	1
Q9NR45	Sialic acid synthase OS=Homo sapiens GN=NANS PE=1 SV=2 - [SIAS_HUMAN]	1	2
Q9NUQ8	ATP-binding cassette sub-family F member 3 OS=Homo sapiens GN=ABCF3 PE=1 SV=2 - [ABCF3_HUMAN]	1	3
Q9NVT9	Armadillo repeat-containing protein 1 OS=Homo sapiens GN=ARMC1 PE=1 SV=1 - [ARMC1_HUMAN]	1	1
Q9NWY4	UPF0609 protein C4orf27 OS=Homo sapiens GN=C4orf27 PE=1 SV=2 - [CD027_HUMAN]	1
Q9NXG2	THUMP domain-containing protein 1 OS=Homo sapiens GN=THUMPD1 PE=1 SV=2 - [THUM1_HUMAN]	1	2
Q9NXH9	tRNA (guanine(26)-N(2))-dimethyltransferase OS=Homo sapiens GN=TRMT1 PE=1 SV=1 - [TRM1_HUMAN]	1
Q9NYP9	Protein Mis18-alpha OS=Homo sapiens GN=MIS18A PE=1 SV=1 - [MS18A_HUMAN]	1
Q9NZJ4	Sacsin OS=Homo sapiens GN=SACS PE=1 SV=2 - [SACS_HUMAN]	1
Q9P225	Dynein heavy chain 2, axonemal OS=Homo sapiens GN=DNAH2 PE=2 SV=3 - [DYH2_HUMAN]	1
Q9UDY8	Mucosa-associated lymphoid tissue lymphoma translocation protein 1 OS=Homo sapiens GN=MALT1 PE=1 SV=1 - [MALT1_HUMAN]	1
Q9UEE5	Serine/threonine-protein kinase 17A OS=Homo sapiens GN=STK17A PE=1 SV=2 - [ST17A_HUMAN]	1
Q9UEW8	STE20/SPS1-related proline-alanine-rich protein kinase OS=Homo sapiens GN=STK39 PE=1 SV=3 - [STK39_HUMAN]	1
Q9UIQ6	Leucyl-cystinyl aminopeptidase OS=Homo sapiens GN=LNPEP PE=1 SV=3 - [LCAP_HUMAN]	1
Q9UJV9	Probable ATP-dependent RNA helicase DDX41 OS=Homo sapiens GN=DDX41 PE=1 SV=2 - [DDX41_HUMAN]	1
Q9UJX3	Anaphase-promoting complex subunit 7 OS=Homo sapiens GN=ANAPC7 PE=1 SV=4 - [APC7_HUMAN]	1	1
Q9UKJ3	G patch domain-containing protein 8 OS=Homo sapiens GN=GPATCH8 PE=1 SV=2 - [GPTC8_HUMAN]	1
Q9UKL0	REST corepressor 1 OS=Homo sapiens GN=RCOR1 PE=1 SV=1 - [RCOR1_HUMAN]	1	2
Q9ULQ0	Striatin-interacting protein 2 OS=Homo sapiens GN=STRIP2 PE=1 SV=2 - [STRP2_HUMAN]	1
Q9UPN7	Serine/threonine-protein phosphatase 6 regulatory subunit 1 OS=Homo sapiens GN=PPP6R1 PE=1 SV=5 - [PP6R1_HUMAN]	1	2
Q9UPW5	Cytosolic carboxypeptidase 1 OS=Homo sapiens GN=AGTPBP1 PE=1 SV=3 - [CBPC1_HUMAN]	1
Q9Y2X9	Zinc finger protein 281 OS=Homo sapiens GN=ZNF281 PE=1 SV=1 - [ZN281_HUMAN]	1
Q9Y3N9	Olfactory receptor 2W1 OS=Homo sapiens GN=OR2W1 PE=2 SV=1 - [OR2W1_HUMAN]	1
Q9Y4W6	AFG3-like protein 2 OS=Homo sapiens GN=AFG3L2 PE=1 SV=2 - [AFG32_HUMAN]	1
Q9Y4X5	E3 ubiquitin-protein ligase ARIH1 OS=Homo sapiens GN=ARIH1 PE=1 SV=2 - [ARI1_HUMAN]	1
Q9Y6Y0	Influenza virus NS1A-binding protein OS=Homo sapiens GN=IVNS1ABP PE=1 SV=3 - [NS1BP_HUMAN]	1
R4GMT0	Alpha-centractin OS=Homo sapiens GN=ACTR1A PE=1 SV=1 - [R4GMT0_HUMAN]	1
R4GNF5	T-complex protein 11-like protein 1 (Fragment) OS=Homo sapiens GN=TCP11L1 PE=1 SV=1 - [R4GNF5_HUMAN]	1
V9GY47	CUGBP Elav-like family member 2 OS=Homo sapiens GN=CELF2 PE=1 SV=1 - [V9GY47_HUMAN]	1
X6RAJ1	A-kinase anchor protein 17A OS=Homo sapiens GN=AKAP17A PE=1 SV=1 - [X6RAJ1_HUMAN]	1
A0A075B6K8	Ig lambda-1 chain C regions (Fragment) OS=Homo sapiens GN=IGLC1 PE=4 SV=1 - [A0A075B6K8_HUMAN]			2
A0A087WUF6	Fibroblast growth factor OS=Homo sapiens GN=FGF2 PE=1 SV=1 - [A0A087WUF6_HUMAN]			1
A0A087WUT6	Eukaryotic translation initiation factor 5B OS=Homo sapiens GN=EIF5B PE=1 SV=1 - [A0A087WUT6_HUMAN]		1
A0A087WV30	NF-kappa-B essential modulator (Fragment) OS=Homo sapiens GN=IKBKG PE=1 SV=1 - [A0A087WV30_HUMAN]		2
A0A087WVD4	Arsenite methyltransferase OS=Homo sapiens GN=AS3MT PE=1 SV=1 - [A0A087WVD4_HUMAN]		3
A0A087WVM4	Monofunctional C1-tetrahydrofolate synthase, mitochondrial OS=Homo sapiens GN=MTHFD1L PE=1 SV=1 - [A0A087WVM4_HUMAN]		1
A0A087WVV1	Proteasome subunit beta type-2 OS=Homo sapiens GN=PSMB2 PE=1 SV=1 - [A0A087WVV1_HUMAN]		1
A0A087WW77	Lethal(2) giant larvae protein homolog 1 OS=Homo sapiens GN=LLGL1 PE=1 SV=1 - [A0A087WW77_HUMAN]		1
A0A087WWB5	Gamma-tubulin complex component 3 OS=Homo sapiens GN=TUBGCP3 PE=1 SV=1 - [A0A087WWB5_HUMAN]		1
A0A087WWG9	E3 ubiquitin-protein ligase UHRF1 (Fragment) OS=Homo sapiens GN=UHRF1 PE=1 SV=1 - [A0A087WWG9_HUMAN]		2
A0A087WWJ1	DNA mismatch repair protein Msh6 OS=Homo sapiens GN=MSH6 PE=1 SV=1 - [A0A087WWJ1_HUMAN]		6
A0A087WWL9	HLA class I histocompatibility antigen, Cw-6 alpha chain OS=Homo sapiens GN=HLA-C PE=1 SV=1 - [A0A087WWL9_HUMAN]		3
A0A087WWS1	THO complex subunit 1 OS=Homo sapiens GN=THOC1 PE=1 SV=1 - [A0A087WWS1_HUMAN]		2
A0A087WX08	Gamma-adducin OS=Homo sapiens GN=ADD3 PE=1 SV=1 - [A0A087WX08_HUMAN]		3
A0A087WX41	Clathrin heavy chain 2 OS=Homo sapiens GN=CLTCL1 PE=1 SV=1 - [A0A087WX41_HUMAN]		8
A0A087WXD9	Girdin OS=Homo sapiens GN=CCDC88A PE=1 SV=1 - [A0A087WXD9_HUMAN]		2
A0A087WXP3	Integrin beta OS=Homo sapiens GN=ITGB6 PE=1 SV=1 - [A0A087WXP3_HUMAN]			2
A0A087WXQ8	Proteasome subunit beta type-3 OS=Homo sapiens GN=PSMB3 PE=1 SV=1 - [A0A087WXQ8_HUMAN]		5	1
A0A087WYD1	AP-2 complex subunit beta (Fragment) OS=Homo sapiens GN=AP2B1 PE=1 SV=1 - [A0A087WYD1_HUMAN]		3
A0A087WYY6	Plakophilin-1 OS=Homo sapiens GN=PKP1 PE=1 SV=1 - [A0A087WYY6_HUMAN]		5
A0A087X0F1	Protein TASOR OS=Homo sapiens GN=FAM208A PE=1 SV=1 - [A0A087X0F1_HUMAN]		1
A0A087X121	Probable ATP-dependent RNA helicase DDX52 (Fragment) OS=Homo sapiens GN=DDX52 PE=1 SV=1 - [A0A087X121_HUMAN]		1
A0A087X1D8	Farnesyl pyrophosphate synthase (Fragment) OS=Homo sapiens GN=FDPS PE=1 SV=1 - [A0A087X1D8_HUMAN]		2
A0A087X271	Calponin (Fragment) OS=Homo sapiens GN=CNN2 PE=1 SV=1 - [A0A087X271_HUMAN]		4
A0A087X2D8	C-Jun-amino-terminal kinase-interacting protein 4 OS=Homo sapiens GN=SPAG9 PE=1 SV=1 - [A0A087X2D8_HUMAN]		1
A0A087X2I6	Keratin, type I cuticular Ha3-II OS=Homo sapiens GN=KRT33B PE=1 SV=1 - [A0A087X2I6_HUMAN]		1
A0A096LNJ1	Protein LOC102724023 (Fragment) OS=Homo sapiens GN=LOC102724023 PE=1 SV=1 - [A0A096LNJ1_HUMAN]		2
A0A096LPH6	Zinc finger protein 638 OS=Homo sapiens GN=ZNF638 PE=1 SV=1 - [A0A096LPH6_HUMAN]		1
A0A0A0MRB9	X-linked interleukin-1 receptor accessory protein-like 2 OS=Homo sapiens GN=IL1RAPL2 PE=4 SV=1 - [A0A0A0MRB9_HUMAN]		1
A0A0A0MRJ9	Rho GTPase-activating protein 30 OS=Homo sapiens GN=ARHGAP30 PE=1 SV=1 - [A0A0A0MRJ9_HUMAN]		2
A0A0A0MRQ5	Peroxiredoxin-1 OS=Homo sapiens GN=PRDX1 PE=1 SV=1 - [A0A0A0MRQ5_HUMAN]			2
A0A0A0MSU3	RecQ-mediated genome instability protein 1 (Fragment) OS=Homo sapiens GN=RMI1 PE=1 SV=1 - [A0A0A0MSU3_HUMAN]		8
A0A0A0MSW3	Nuclear pore complex protein Nup214 OS=Homo sapiens GN=NUP214 PE=1 SV=1 - [A0A0A0MSW3_HUMAN]		1
A0A0A0MTP7	Protein SCAF11 OS=Homo sapiens GN=SCAF11 PE=1 SV=1 - [A0A0A0MTP7_HUMAN]		1
A0A0A6YY96	Iron-responsive element-binding protein 2 OS=Homo sapiens GN=IREB2 PE=1 SV=1 - [A0A0A6YY96_HUMAN]		1
A0A0A6YYC3	Protein C7orf55-LUC7L2 OS=Homo sapiens GN=C7orf55-LUC7L2 PE=4 SV=1 - [A0A0A6YYC3_HUMAN]		3
A0A0B4J207	Ribose-phosphate pyrophosphokinase 3 OS=Homo sapiens GN=PRPS1L1 PE=1 SV=1 - [A0A0B4J207_HUMAN]		2
A0A0C4DGG3	Lysine-specific demethylase 2B OS=Homo sapiens GN=KDM2B PE=1 SV=1 - [A0A0C4DGG3_HUMAN]		1
A0A0C4DGI3	Citrate synthase OS=Homo sapiens GN=CS PE=1 SV=1 - [A0A0C4DGI3_HUMAN]		2
A0A0C4DGS5	Golgi autoantigen, golgin subfamily a, 2, isoform CRA_a OS=Homo sapiens GN=GOLGA2 PE=1 SV=1 - [A0A0C4DGS5_HUMAN]		1
A0A0D9SFD2	Protein THEMIS OS=Homo sapiens GN=THEMIS PE=1 SV=1 - [A0A0D9SFD2_HUMAN]		27
A0A0D9SFE5	Lamin B1, isoform CRA_a OS=Homo sapiens GN=LMNB1 PE=1 SV=1 - [A0A0D9SFE5_HUMAN]		8
A0A0D9SGI3	Ubiquitin-protein ligase E3A (Fragment) OS=Homo sapiens GN=UBE3A PE=1 SV=1 - [A0A0D9SGI3_HUMAN]		1
A0A0G2JMB2	Ig alpha-2 chain C region (Fragment) OS=Homo sapiens GN=IGHA2 PE=1 SV=1 - [A0A0G2JMB2_HUMAN]			1
A0A0G2JNZ2	Protein scribble homolog OS=Homo sapiens GN=SCRIB PE=1 SV=1 - [A0A0G2JNZ2_HUMAN]		3
A0A0G2JP24	T-cell receptor beta-2 chain C region OS=Homo sapiens GN=TRBC2 PE=1 SV=1 - [A0A0G2JP24_HUMAN]		5
A0A0G2JRN3	Alpha-1-antitrypsin OS=Homo sapiens GN=SERPINA1 PE=1 SV=1 - [A0A0G2JRN3_HUMAN]			1
A0A0G2JS81	Lanosterol synthase (Fragment) OS=Homo sapiens GN=LSS PE=1 SV=1 - [A0A0G2JS81_HUMAN]		1
A0A0J9YX88	PHD and RING finger domain-containing protein 1 OS=Homo sapiens GN=PHRF1 PE=1 SV=1 - [A0A0J9YX88_HUMAN]		1
A2A2D0	Stathmin (Fragment) OS=Homo sapiens GN=STMN1 PE=1 SV=6 - [A2A2D0_HUMAN]		1
A3KFI9	Cleavage stimulation factor subunit 1 (Fragment) OS=Homo sapiens GN=CSTF1 PE=1 SV=1 - [A3KFI9_HUMAN]		1
A4D1P6	WD repeat-containing protein 91 OS=Homo sapiens GN=WDR91 PE=1 SV=2 - [WDR91_HUMAN]		1
A5A3E0	POTE ankyrin domain family member F OS=Homo sapiens GN=POTEF PE=1 SV=2 - [POTEF_HUMAN]		37
A6NE76	Cullin-4B (Fragment) OS=Homo sapiens GN=CUL4B PE=1 SV=2 - [A6NE76_HUMAN]		1
A6NFQ7	Divergent paired-related homeobox OS=Homo sapiens GN=DPRX PE=3 SV=1 - [DPRX_HUMAN]			1
A6NKB8	Aminopeptidase B OS=Homo sapiens GN=RNPEP PE=1 SV=1 - [A6NKB8_HUMAN]		3
A6PVN8	Serine/threonine-protein phosphatase 2A activator (Fragment) OS=Homo sapiens GN=PPP2R4 PE=1 SV=1 - [A6PVN8_HUMAN]		4
A8K2U0	Alpha-2-macroglobulin-like protein 1 OS=Homo sapiens GN=A2ML1 PE=1 SV=3 - [A2ML1_HUMAN]		1
A8MU39	Serine/threonine-protein phosphatase OS=Homo sapiens GN=PPP5C PE=1 SV=1 - [A8MU39_HUMAN]		1
A8MUD9	60S ribosomal protein L7 OS=Homo sapiens GN=RPL7 PE=1 SV=1 - [A8MUD9_HUMAN]		1
A8MW50	L-lactate dehydrogenase (Fragment) OS=Homo sapiens GN=LDHB PE=1 SV=1 - [A8MW50_HUMAN]			3
A8MXE8	Retinoic acid-induced protein 1 (Fragment) OS=Homo sapiens GN=RAI1 PE=1 SV=1 - [A8MXE8_HUMAN]		1
B1AHB1	DNA helicase OS=Homo sapiens GN=MCM5 PE=1 SV=1 - [B1AHB1_HUMAN]		7
B1AJY5	26S proteasome non-ATPase regulatory subunit 10 OS=Homo sapiens GN=PSMD10 PE=1 SV=1 - [B1AJY5_HUMAN]		1
B1AK81	GPI-anchor transamidase OS=Homo sapiens GN=PIGK PE=1 SV=1 - [B1AK81_HUMAN]		1
B1AK85	F-actin-capping protein subunit beta OS=Homo sapiens GN=CAPZB PE=1 SV=1 - [B1AK85_HUMAN]			1
B1AUU8	Epidermal growth factor receptor substrate 15 OS=Homo sapiens GN=EPS15 PE=1 SV=1 - [B1AUU8_HUMAN]		6
B4DEV8	Proteasome subunit alpha type OS=Homo sapiens PE=2 SV=1 - [B4DEV8_HUMAN]		1
B4E0K5	Mitogen-activated protein kinase 14 OS=Homo sapiens GN=MAPK14 PE=1 SV=1 - [B4E0K5_HUMAN]		2
B5MCF9	Pescadillo homolog OS=Homo sapiens GN=PES1 PE=1 SV=1 - [B5MCF9_HUMAN]		3
B5MCW2	60S ribosomal protein L3 (Fragment) OS=Homo sapiens GN=RPL3 PE=1 SV=1 - [B5MCW2_HUMAN]		3
B7Z673	Dapper homolog 1 OS=Homo sapiens GN=DACT1 PE=1 SV=1 - [B7Z673_HUMAN]		1
B7Z6P0	Cytosolic Fe-S cluster assembly factor NUBP2 OS=Homo sapiens GN=NUBP2 PE=1 SV=1 - [B7Z6P0_HUMAN]		3
B7Z7P8	Eukaryotic peptide chain release factor subunit 1 OS=Homo sapiens GN=ETF1 PE=1 SV=1 - [B7Z7P8_HUMAN]		1
B8ZZ51	Malate dehydrogenase, cytoplasmic OS=Homo sapiens GN=MDH1 PE=1 SV=1 - [B8ZZ51_HUMAN]		2
B8ZZP4	Secernin-1 OS=Homo sapiens GN=SCRN1 PE=1 SV=1 - [B8ZZP4_HUMAN]		2
B8ZZQ6	Prothymosin alpha OS=Homo sapiens GN=PTMA PE=1 SV=1 - [B8ZZQ6_HUMAN]		1
B8ZZS4	Ankyrin repeat and zinc finger domain-containing protein 1 OS=Homo sapiens GN=ANKZF1 PE=1 SV=1 - [B8ZZS4_HUMAN]		1
B9ZVX7	Glutathione S-transferase Mu 1 OS=Homo sapiens GN=GSTM1 PE=1 SV=1 - [B9ZVX7_HUMAN]		2
C9J2I1	Armadillo repeat-containing protein 8 (Fragment) OS=Homo sapiens GN=ARMC8 PE=1 SV=1 - [C9J2I1_HUMAN]		1
C9J3U1	3-oxo-5-beta-steroid 4-dehydrogenase (Fragment) OS=Homo sapiens GN=AKR1D1 PE=1 SV=1 - [C9J3U1_HUMAN]		1
C9J4M6	DNA-directed RNA polymerase OS=Homo sapiens GN=POLR2B PE=1 SV=2 - [C9J4M6_HUMAN]		1
C9JBA9	Tyrosine-protein phosphatase non-receptor type 7 (Fragment) OS=Homo sapiens GN=PTPN7 PE=1 SV=1 - [C9JBA9_HUMAN]		1
C9JBI3	Phosphoserine phosphatase (Fragment) OS=Homo sapiens GN=PSPH PE=1 SV=1 - [C9JBI3_HUMAN]		1
C9JDF5	Carbohydrate-responsive element-binding protein (Fragment) OS=Homo sapiens GN=MLXIPL PE=1 SV=1 - [C9JDF5_HUMAN]		1
C9JEV6	N-acetyl-D-glucosamine kinase OS=Homo sapiens GN=NAGK PE=1 SV=3 - [C9JEV6_HUMAN]		3
C9JFE4	COP9 signalosome complex subunit 1 OS=Homo sapiens GN=GPS1 PE=1 SV=2 - [C9JFE4_HUMAN]		2
C9JG32	Elongation factor Ts (Fragment) OS=Homo sapiens GN=TSFM PE=1 SV=1 - [C9JG32_HUMAN]		1
C9JG87	39S ribosomal protein L39, mitochondrial (Fragment) OS=Homo sapiens GN=MRPL39 PE=1 SV=1 - [C9JG87_HUMAN]		1
C9JHG2	Raftlin (Fragment) OS=Homo sapiens GN=RFTN1 PE=1 SV=1 - [C9JHG2_HUMAN]		2
C9JHZ6	Nuclear receptor-binding protein (Fragment) OS=Homo sapiens GN=NRBP1 PE=1 SV=1 - [C9JHZ6_HUMAN]		1
C9JJ34	Ran-specific GTPase-activating protein (Fragment) OS=Homo sapiens GN=RANBP1 PE=1 SV=1 - [C9JJ34_HUMAN]		3
C9JK83	STAM-binding protein (Fragment) OS=Homo sapiens GN=STAMBP PE=1 SV=1 - [C9JK83_HUMAN]		1
C9JVG0	Serotransferrin (Fragment) OS=Homo sapiens GN=TF PE=1 SV=1 - [C9JVG0_HUMAN]			1
C9JW52	Insulin-like growth factor-binding protein 2 (Fragment) OS=Homo sapiens GN=IGFBP2 PE=1 SV=1 - [C9JW52_HUMAN]		1
C9JW96	Prohibitin (Fragment) OS=Homo sapiens GN=PHB PE=1 SV=2 - [C9JW96_HUMAN]		2
C9JXK9	Lipoma-preferred partner (Fragment) OS=Homo sapiens GN=LPP PE=1 SV=1 - [C9JXK9_HUMAN]		1
C9JXR7	Caspase-3 (Fragment) OS=Homo sapiens GN=CASP3 PE=1 SV=2 - [C9JXR7_HUMAN]		1
C9JYN0	Synaptophysin-like protein 1 OS=Homo sapiens GN=SYPL1 PE=1 SV=1 - [C9JYN0_HUMAN]		1
C9JZG1	Eukaryotic translation initiation factor 3 subunit B (Fragment) OS=Homo sapiens GN=EIF3B PE=1 SV=1 - [C9JZG1_HUMAN]		1
D3YTB5	Interleukin-1 receptor-associated kinase 1 OS=Homo sapiens GN=IRAK1 PE=1 SV=1 - [D3YTB5_HUMAN]		4
D6R9A6	High mobility group protein B2 (Fragment) OS=Homo sapiens GN=HMGB2 PE=1 SV=1 - [D6R9A6_HUMAN]		4
D6R9I9	ATP-binding cassette sub-family E member 1 OS=Homo sapiens GN=ABCE1 PE=1 SV=1 - [D6R9I9_HUMAN]		9
D6R9P2	Mitochondrial sodium/hydrogen exchanger 9B2 OS=Homo sapiens GN=SLC9B2 PE=4 SV=1 - [D6R9P2_HUMAN]		2
D6RAA6	Transmembrane protein 33 (Fragment) OS=Homo sapiens GN=TMEM33 PE=1 SV=1 - [D6RAA6_HUMAN]		2
D6RC40	BRCA1-A complex subunit RAP80 (Fragment) OS=Homo sapiens GN=UIMC1 PE=1 SV=1 - [D6RC40_HUMAN]		1
D6RDA2	Protein DEK (Fragment) OS=Homo sapiens GN=DEK PE=1 SV=1 - [D6RDA2_HUMAN]		3
D6RF44	Heterogeneous nuclear ribonucleoprotein D0 (Fragment) OS=Homo sapiens GN=HNRNPD PE=1 SV=6 - [D6RF44_HUMAN]			1
D6RFG0	Angiomotin-like protein 2 (Fragment) OS=Homo sapiens GN=AMOTL2 PE=1 SV=1 - [D6RFG0_HUMAN]		1
D6RFH4	Cytochrome b5 type B OS=Homo sapiens GN=CYB5B PE=1 SV=1 - [D6RFH4_HUMAN]		1
D6RG13	40S ribosomal protein S3a (Fragment) OS=Homo sapiens GN=RPS3A PE=1 SV=1 - [D6RG13_HUMAN]		4
D6RH20	28S ribosomal protein S27, mitochondrial (Fragment) OS=Homo sapiens GN=MRPS27 PE=1 SV=1 - [D6RH20_HUMAN]		1
D6RHC4	Ankyrin repeat and KH domain-containing protein 1 (Fragment) OS=Homo sapiens GN=ANKHD1 PE=1 SV=1 - [D6RHC4_HUMAN]		2
D6RJ98	Phosphoinositide 3-kinase regulatory subunit 4 (Fragment) OS=Homo sapiens GN=PIK3R4 PE=1 SV=1 - [D6RJ98_HUMAN]		1
D6RJE6	Probable histidine--tRNA ligase, mitochondrial (Fragment) OS=Homo sapiens GN=HARS2 PE=1 SV=1 - [D6RJE6_HUMAN]			1
E2QRN5	SET and MYND domain-containing protein 5 OS=Homo sapiens GN=SMYD5 PE=1 SV=1 - [E2QRN5_HUMAN]		1
E5RFG1	UPF0489 protein C5orf22 OS=Homo sapiens GN=C5orf22 PE=1 SV=1 - [E5RFG1_HUMAN]		1
E5RFJ0	Dedicator of cytokinesis protein 2 OS=Homo sapiens GN=DOCK2 PE=1 SV=1 - [E5RFJ0_HUMAN]		2
E5RG13	Inositol monophosphatase 1 (Fragment) OS=Homo sapiens GN=IMPA1 PE=1 SV=1 - [E5RG13_HUMAN]		1
E5RGA2	Eukaryotic translation initiation factor 3 subunit E OS=Homo sapiens GN=EIF3E PE=1 SV=1 - [E5RGA2_HUMAN]		2
E5RGE1	14-3-3 protein zeta/delta (Fragment) OS=Homo sapiens GN=YWHAZ PE=1 SV=6 - [E5RGE1_HUMAN]			1
E5RGH4	Heterogeneous nuclear ribonucleoprotein H (Fragment) OS=Homo sapiens GN=HNRNPH1 PE=1 SV=1 - [E5RGH4_HUMAN]			1
E5RH50	La-related protein 1 (Fragment) OS=Homo sapiens GN=LARP1 PE=1 SV=6 - [E5RH50_HUMAN]		2
E5RI98	Nucleophosmin (Fragment) OS=Homo sapiens GN=NPM1 PE=1 SV=1 - [E5RI98_HUMAN]			1
E5RJD2	2,4-dienoyl-CoA reductase, mitochondrial (Fragment) OS=Homo sapiens GN=DECR1 PE=1 SV=1 - [E5RJD2_HUMAN]		3
E5RJY1	Protein NDRG1 OS=Homo sapiens GN=NDRG1 PE=1 SV=1 - [E5RJY1_HUMAN]		1
E7EPB3	60S ribosomal protein L14 OS=Homo sapiens GN=RPL14 PE=1 SV=1 - [E7EPB3_HUMAN]		1
E7EPL9	Peroxisomal multifunctional enzyme type 2 OS=Homo sapiens GN=HSD17B4 PE=1 SV=1 - [E7EPL9_HUMAN]		2
E7EQB2	Lactotransferrin (Fragment) OS=Homo sapiens GN=LTF PE=1 SV=1 - [E7EQB2_HUMAN]		1
E7EQG2	Eukaryotic initiation factor 4A-II OS=Homo sapiens GN=EIF4A2 PE=1 SV=1 - [E7EQG2_HUMAN]		11
E7ER68	Protein FAM91A1 OS=Homo sapiens GN=FAM91A1 PE=1 SV=1 - [E7ER68_HUMAN]		2
E7EVW7	Hematopoietic lineage cell-specific protein OS=Homo sapiens GN=HCLS1 PE=1 SV=1 - [E7EVW7_HUMAN]		2
E7EWK3	ATP-dependent RNA helicase DHX36 (Fragment) OS=Homo sapiens GN=DHX36 PE=1 SV=1 - [E7EWK3_HUMAN]		1
E9PC90	G2/mitotic-specific cyclin-B1 (Fragment) OS=Homo sapiens GN=CCNB1 PE=1 SV=1 - [E9PC90_HUMAN]		1
E9PEM5	Lipopolysaccharide-responsive and beige-like anchor protein OS=Homo sapiens GN=LRBA PE=1 SV=1 - [E9PEM5_HUMAN]		3
E9PF16	Acyl-CoA synthetase family member 2, mitochondrial OS=Homo sapiens GN=ACSF2 PE=1 SV=1 - [E9PF16_HUMAN]		2
E9PFD9	Semaphorin-4D OS=Homo sapiens GN=SEMA4D PE=1 SV=1 - [E9PFD9_HUMAN]		1
E9PFW8	Sequestosome-1 (Fragment) OS=Homo sapiens GN=SQSTM1 PE=1 SV=1 - [E9PFW8_HUMAN]		1
E9PG15	14-3-3 protein theta (Fragment) OS=Homo sapiens GN=YWHAQ PE=1 SV=1 - [E9PG15_HUMAN]			1
E9PG22	Centrosomal protein of 97 kDa OS=Homo sapiens GN=CEP97 PE=1 SV=1 - [E9PG22_HUMAN]		3
E9PGG1	Cytoplasmic dynein 1 intermediate chain 2 (Fragment) OS=Homo sapiens GN=DYNC1I2 PE=1 SV=1 - [E9PGG1_HUMAN]		1
E9PI26	General transcription factor IIH subunit 1 OS=Homo sapiens GN=GTF2H1 PE=1 SV=1 - [E9PI26_HUMAN]		1
E9PIJ1	AMP deaminase 2 (Fragment) OS=Homo sapiens GN=AMPD2 PE=1 SV=1 - [E9PIJ1_HUMAN]		1
E9PIN3	Nuclear RNA export factor 1 (Fragment) OS=Homo sapiens GN=NXF1 PE=1 SV=1 - [E9PIN3_HUMAN]		2
E9PJ81	UBX domain-containing protein 1 (Fragment) OS=Homo sapiens GN=UBXN1 PE=1 SV=1 - [E9PJ81_HUMAN]		4
E9PJD9	60S ribosomal protein L27a OS=Homo sapiens GN=RPL27A PE=1 SV=1 - [E9PJD9_HUMAN]		1
E9PK08	Serine/threonine-protein phosphatase 6 regulatory subunit 3 (Fragment) OS=Homo sapiens GN=PPP6R3 PE=1 SV=1 - [E9PK08_HUMAN]		2
E9PK67	Poly [ADP-ribose] polymerase OS=Homo sapiens GN=PARP10 PE=1 SV=1 - [E9PK67_HUMAN]		1
E9PK69	Tripartite motif-containing protein 49 OS=Homo sapiens GN=TRIM49 PE=4 SV=2 - [E9PK69_HUMAN]			1
E9PKE3	Heat shock cognate 71 kDa protein OS=Homo sapiens GN=HSPA8 PE=1 SV=1 - [E9PKE3_HUMAN]			7
E9PKL4	Uncharacterized protein C11orf96 OS=Homo sapiens GN=C11orf96 PE=4 SV=1 - [E9PKL4_HUMAN]		1
E9PLA9	Caprin-1 (Fragment) OS=Homo sapiens GN=CAPRIN1 PE=1 SV=1 - [E9PLA9_HUMAN]		6
E9PM69	26S protease regulatory subunit 6A OS=Homo sapiens GN=PSMC3 PE=1 SV=1 - [E9PM69_HUMAN]		6
E9PNW0	Nucleosome assembly protein 1-like 4 (Fragment) OS=Homo sapiens GN=NAP1L4 PE=1 SV=1 - [E9PNW0_HUMAN]		2
E9PP76	Copper chaperone for superoxide dismutase (Fragment) OS=Homo sapiens GN=CCS PE=1 SV=1 - [E9PP76_HUMAN]		1
E9PPR1	Elongation factor 1-delta (Fragment) OS=Homo sapiens GN=EEF1D PE=1 SV=1 - [E9PPR1_HUMAN]		8
E9PQ58	Calcineurin B homologous protein 3 OS=Homo sapiens GN=TESC PE=1 SV=1 - [E9PQ58_HUMAN]		1
E9PQ61	Zinc finger CCCH domain-containing protein 11A OS=Homo sapiens GN=ZC3H11A PE=1 SV=1 - [E9PQ61_HUMAN]		3
E9PQA3	Condensin-2 complex subunit D3 (Fragment) OS=Homo sapiens GN=NCAPD3 PE=1 SV=6 - [E9PQA3_HUMAN]		1
E9PR16	Nuclear pore complex protein Nup160 (Fragment) OS=Homo sapiens GN=NUP160 PE=1 SV=2 - [E9PR16_HUMAN]		1
F2Z2V0	Copine-1 (Fragment) OS=Homo sapiens GN=CPNE1 PE=1 SV=1 - [F2Z2V0_HUMAN]		11
F2Z2X4	Exportin-4 OS=Homo sapiens GN=XPO4 PE=1 SV=1 - [F2Z2X4_HUMAN]		1
F5GWT4	Serine/threonine-protein kinase WNK1 OS=Homo sapiens GN=WNK1 PE=1 SV=1 - [F5GWT4_HUMAN]		2
F5GXM3	IST1 homolog (Fragment) OS=Homo sapiens GN=IST1 PE=1 SV=1 - [F5GXM3_HUMAN]		1
F5GXS8	Protein quaking (Fragment) OS=Homo sapiens GN=QKI PE=1 SV=1 - [F5GXS8_HUMAN]		1
F5GYR3	Probable 28S rRNA (cytosine(4447)-C(5))-methyltransferase (Fragment) OS=Homo sapiens GN=NOP2 PE=1 SV=1 - [F5GYR3_HUMAN]		1
F5GZ00	Calcium/calmodulin-dependent protein kinase kinase 2 OS=Homo sapiens GN=CAMKK2 PE=1 SV=1 - [F5GZ00_HUMAN]		1
F5GZ28	DNA ligase OS=Homo sapiens GN=LIG1 PE=1 SV=1 - [F5GZ28_HUMAN]		3
F5GZY1	Protein-glutamate O-methyltransferase OS=Homo sapiens GN=ARMT1 PE=1 SV=1 - [F5GZY1_HUMAN]		1
F5H282	T-complex protein 1 subunit alpha OS=Homo sapiens GN=TCP1 PE=1 SV=1 - [F5H282_HUMAN]			2
F5H2R5	Rho GDP-dissociation inhibitor 2 (Fragment) OS=Homo sapiens GN=ARHGDIB PE=1 SV=1 - [F5H2R5_HUMAN]		2
F5H5B7	Cleavage and polyadenylation-specificity factor subunit 7 OS=Homo sapiens GN=CPSF7 PE=1 SV=1 - [F5H5B7_HUMAN]		1
F5H803	Zinc finger CCHC domain-containing protein 8 (Fragment) OS=Homo sapiens GN=ZCCHC8 PE=1 SV=1 - [F5H803_HUMAN]		2
F5H8D7	DNA repair protein XRCC1 OS=Homo sapiens GN=XRCC1 PE=1 SV=2 - [F5H8D7_HUMAN]		1
F8VPE8	60S acidic ribosomal protein P0 (Fragment) OS=Homo sapiens GN=RPLP0 PE=1 SV=1 - [F8VPE8_HUMAN]			2
F8VRS8	CCR4-NOT transcription complex subunit 2 (Fragment) OS=Homo sapiens GN=CNOT2 PE=1 SV=1 - [F8VRS8_HUMAN]		2
F8VU51	YLP motif-containing protein 1 OS=Homo sapiens GN=YLPM1 PE=1 SV=1 - [F8VU51_HUMAN]		1
F8VV32	Lysozyme OS=Homo sapiens GN=LYZ PE=1 SV=1 - [F8VV32_HUMAN]		2	2
F8VX13	ATP-dependent 6-phosphofructokinase, muscle type (Fragment) OS=Homo sapiens GN=PFKM PE=1 SV=1 - [F8VX13_HUMAN]		1
F8VZA3	60S ribosomal protein L6 (Fragment) OS=Homo sapiens GN=RPL6 PE=1 SV=1 - [F8VZA3_HUMAN]		1
F8W079	ATP synthase subunit beta, mitochondrial (Fragment) OS=Homo sapiens GN=ATP5B PE=1 SV=1 - [F8W079_HUMAN]		1
F8W696	Apolipoprotein A-I OS=Homo sapiens GN=APOA1 PE=1 SV=1 - [F8W696_HUMAN]			1
F8W6P5	Hemoglobin subunit beta (Fragment) OS=Homo sapiens GN=HBB PE=1 SV=1 - [F8W6P5_HUMAN]		1
F8W7C6	60S ribosomal protein L10 OS=Homo sapiens GN=RPL10 PE=1 SV=2 - [F8W7C6_HUMAN]		7
F8W914	Reticulon OS=Homo sapiens GN=RTN4 PE=1 SV=1 - [F8W914_HUMAN]		2
F8WAM2	T-complex protein 1 subunit eta (Fragment) OS=Homo sapiens GN=CCT7 PE=1 SV=1 - [F8WAM2_HUMAN]			1
F8WAU4	Elongation factor G, mitochondrial OS=Homo sapiens GN=GFM1 PE=1 SV=1 - [F8WAU4_HUMAN]		1
F8WBF9	Protein NDRG3 OS=Homo sapiens GN=NDRG3 PE=1 SV=1 - [F8WBF9_HUMAN]		1
F8WE04	Heat shock protein beta-1 OS=Homo sapiens GN=HSPB1 PE=1 SV=1 - [F8WE04_HUMAN]		1
F8WES2	S-methyl-5'-thioadenosine phosphorylase OS=Homo sapiens GN=MTAP PE=4 SV=1 - [F8WES2_HUMAN]		1
F8WJN3	Cleavage and polyadenylation-specificity factor subunit 6 OS=Homo sapiens GN=CPSF6 PE=1 SV=1 - [F8WJN3_HUMAN]		1
G3V0E5	Transferrin receptor (P90, CD71), isoform CRA_c OS=Homo sapiens GN=TFRC PE=1 SV=1 - [G3V0E5_HUMAN]		5
G3V126	ATPase, H+ transporting, lysosomal 50/57kDa, V1 subunit H, isoform CRA_c OS=Homo sapiens GN=ATP6V1H PE=1 SV=1 - [G3V126_HUMAN]		5
G3V150	Beta-1,3-glucuronyltransferase 3 (Glucuronosyltransferase I), isoform CRA_a OS=Homo sapiens GN=B3GAT3 PE=1 SV=1 - [G3V150_HUMAN]		1
G3V1Q4	Septin 7, isoform CRA_a OS=Homo sapiens GN=SEPT7 PE=1 SV=1 - [G3V1Q4_HUMAN]		6
G3V1Y7	Myosin light polypeptide 6 OS=Homo sapiens GN=MYL6 PE=1 SV=1 - [G3V1Y7_HUMAN]		2
G3V2Y4	Serine hydroxymethyltransferase (Fragment) OS=Homo sapiens GN=SHMT2 PE=1 SV=1 - [G3V2Y4_HUMAN]		4
G3V3U4	Proteasome subunit alpha type OS=Homo sapiens GN=PSMA6 PE=1 SV=1 - [G3V3U4_HUMAN]		3
G3V4E1	Diacylglycerol kinase (Fragment) OS=Homo sapiens GN=DGKA PE=1 SV=1 - [G3V4E1_HUMAN]		1
G3V5Q1	DNA-(apurinic or apyrimidinic site) lyase (Fragment) OS=Homo sapiens GN=APEX1 PE=1 SV=1 - [G3V5Q1_HUMAN]		2
G3V5S1	L-2-hydroxyglutarate dehydrogenase, mitochondrial OS=Homo sapiens GN=L2HGDH PE=1 SV=1 - [G3V5S1_HUMAN]		1
G3XAN0	40S ribosomal protein S20 OS=Homo sapiens GN=RPS20 PE=1 SV=1 - [G3XAN0_HUMAN]		1
G8JLG1	Structural maintenance of chromosomes protein OS=Homo sapiens GN=SMC1A PE=1 SV=2 - [G8JLG1_HUMAN]		3
H0Y394	Vigilin (Fragment) OS=Homo sapiens GN=HDLBP PE=1 SV=1 - [H0Y394_HUMAN]		1
H0Y3Y9	26S proteasome non-ATPase regulatory subunit 4 (Fragment) OS=Homo sapiens GN=PSMD4 PE=1 SV=1 - [H0Y3Y9_HUMAN]		1
H0Y4D4	3-ketoacyl-CoA thiolase, peroxisomal (Fragment) OS=Homo sapiens GN=ACAA1 PE=1 SV=1 - [H0Y4D4_HUMAN]		1
H0Y4T7	Metastasis-associated protein MTA1 (Fragment) OS=Homo sapiens GN=MTA1 PE=1 SV=1 - [H0Y4T7_HUMAN]		2
H0Y6A0	ADP-ribosylation factor GTPase-activating protein 3 (Fragment) OS=Homo sapiens GN=ARFGAP3 PE=1 SV=1 - [H0Y6A0_HUMAN]		1
H0Y6S1	Sex comb on midleg-like protein 2 (Fragment) OS=Homo sapiens GN=SCML2 PE=1 SV=1 - [H0Y6S1_HUMAN]		1
H0Y711	Methylosome protein 50 (Fragment) OS=Homo sapiens GN=WDR77 PE=1 SV=1 - [H0Y711_HUMAN]		2
H0Y7C1	Sodium/potassium-transporting ATPase subunit alpha (Fragment) OS=Homo sapiens GN=ATP1A2 PE=1 SV=1 - [H0Y7C1_HUMAN]		1
H0Y8R3	Recombining-binding protein suppressor of hairless (Fragment) OS=Homo sapiens GN=RBPJ PE=1 SV=1 - [H0Y8R3_HUMAN]		1
H0Y8S8	Ubiquitin-like modifier-activating enzyme 6 (Fragment) OS=Homo sapiens GN=UBA6 PE=1 SV=1 - [H0Y8S8_HUMAN]		1
H0Y8U5	C-terminal-binding protein 1 (Fragment) OS=Homo sapiens GN=CTBP1 PE=1 SV=1 - [H0Y8U5_HUMAN]		1
H0Y917	WD repeat-containing protein 26 (Fragment) OS=Homo sapiens GN=WDR26 PE=1 SV=1 - [H0Y917_HUMAN]		1
H0Y970	Adaptin ear-binding coat-associated protein 2 (Fragment) OS=Homo sapiens GN=NECAP2 PE=1 SV=1 - [H0Y970_HUMAN]		1
H0Y9D8	Inorganic pyrophosphatase 2, mitochondrial (Fragment) OS=Homo sapiens GN=PPA2 PE=1 SV=1 - [H0Y9D8_HUMAN]		2
H0Y9K1	Protein transport protein Sec31A (Fragment) OS=Homo sapiens GN=SEC31A PE=1 SV=1 - [H0Y9K1_HUMAN]		1
H0Y9R4	60S ribosomal protein L9 (Fragment) OS=Homo sapiens GN=RPL9 PE=1 SV=1 - [H0Y9R4_HUMAN]		1
H0YAM1	G-rich sequence factor 1 (Fragment) OS=Homo sapiens GN=GRSF1 PE=1 SV=1 - [H0YAM1_HUMAN]		1
H0YBT3	CCR4-NOT transcription complex subunit 7 (Fragment) OS=Homo sapiens GN=CNOT7 PE=1 SV=1 - [H0YBT3_HUMAN]		1
H0YBW4	Phospholipase A-2-activating protein (Fragment) OS=Homo sapiens GN=PLAA PE=1 SV=1 - [H0YBW4_HUMAN]		1
H0YCQ8	Eukaryotic translation initiation factor 3 subunit M (Fragment) OS=Homo sapiens GN=EIF3M PE=1 SV=6 - [H0YCQ8_HUMAN]		1
H0YCZ2	Protein CASC5 (Fragment) OS=Homo sapiens GN=CASC5 PE=1 SV=1 - [H0YCZ2_HUMAN]		1
H0YDD8	60S acidic ribosomal protein P2 (Fragment) OS=Homo sapiens GN=RPLP2 PE=1 SV=1 - [H0YDD8_HUMAN]			1
H0YDS9	Nuclear autoantigenic sperm protein (Fragment) OS=Homo sapiens GN=NASP PE=1 SV=1 - [H0YDS9_HUMAN]			1
H0YEU5	Histone-binding protein RBBP4 (Fragment) OS=Homo sapiens GN=RBBP4 PE=1 SV=1 - [H0YEU5_HUMAN]		6	1
H0YEW1	Leucine-rich repeat serine/threonine-protein kinase 1 (Fragment) OS=Homo sapiens GN=LRRK1 PE=1 SV=1 - [H0YEW1_HUMAN]		1
H0YFD2	Protein KRI1 homolog (Fragment) OS=Homo sapiens GN=KRI1 PE=1 SV=3 - [H0YFD2_HUMAN]		1
H0YFP2	WD repeat-containing protein 74 (Fragment) OS=Homo sapiens GN=WDR74 PE=1 SV=1 - [H0YFP2_HUMAN]		1
H0YFX9	Histone H2A (Fragment) OS=Homo sapiens GN=H2AFJ PE=1 SV=1 - [H0YFX9_HUMAN]		1
H0YGB8	Kinesin light chain 1 (Fragment) OS=Homo sapiens GN=KLC1 PE=4 SV=1 - [H0YGB8_HUMAN]		1
H0YGW7	ATP-binding cassette sub-family F member 1 (Fragment) OS=Homo sapiens GN=ABCF1 PE=1 SV=1 - [H0YGW7_HUMAN]		1
H0YHL1	Dynactin subunit 2 (Fragment) OS=Homo sapiens GN=DCTN2 PE=1 SV=1 - [H0YHL1_HUMAN]		1
H0YI02	Rab-3A-interacting protein (Fragment) OS=Homo sapiens GN=RAB3IP PE=1 SV=1 - [H0YI02_HUMAN]		1
H0YJ30	Gephyrin (Fragment) OS=Homo sapiens GN=GPHN PE=1 SV=1 - [H0YJ30_HUMAN]		1
H0YJ35	Serine/threonine-protein phosphatase 2A 56 kDa regulatory subunit gamma isoform (Fragment) OS=Homo sapiens GN=PPP2R5C PE=4 SV=1 - [H0YJ35_HUMAN]		1
H0YJ44	Tyrosyl-DNA phosphodiesterase 1 (Fragment) OS=Homo sapiens GN=TDP1 PE=1 SV=1 - [H0YJ44_HUMAN]		1
H0YJ87	Zinc finger CCCH domain-containing protein 14 (Fragment) OS=Homo sapiens GN=ZC3H14 PE=1 SV=1 - [H0YJ87_HUMAN]		1
H0YJH9	Polyadenylate-binding protein 2 (Fragment) OS=Homo sapiens GN=PABPN1 PE=1 SV=1 - [H0YJH9_HUMAN]		1
H0YJN9	Legumain (Fragment) OS=Homo sapiens GN=LGMN PE=1 SV=1 - [H0YJN9_HUMAN]		1
H0YKS0	Proteasome subunit alpha type-4 (Fragment) OS=Homo sapiens GN=PSMA4 PE=1 SV=1 - [H0YKS0_HUMAN]		1
H0YLA4	Sorbitol dehydrogenase OS=Homo sapiens GN=SORD PE=1 SV=1 - [H0YLA4_HUMAN]		1
H0YLZ8	Aminopeptidase N (Fragment) OS=Homo sapiens GN=ANPEP PE=1 SV=1 - [H0YLZ8_HUMAN]		1
H0YMD0	Annexin (Fragment) OS=Homo sapiens GN=ANXA2 PE=1 SV=1 - [H0YMD0_HUMAN]		9
H0YMD3	Zinc finger E-box-binding homeobox 1 (Fragment) OS=Homo sapiens GN=ZEB1 PE=1 SV=3 - [H0YMD3_HUMAN]		1
H0YMD9	Annexin A2 (Fragment) OS=Homo sapiens GN=ANXA2 PE=1 SV=1 - [H0YMD9_HUMAN]			1
H0YMP2	Mothers against decapentaplegic homolog 3 (Fragment) OS=Homo sapiens GN=SMAD3 PE=1 SV=1 - [H0YMP2_HUMAN]		1
H3BMZ2	CCR4-NOT transcription complex subunit 1 (Fragment) OS=Homo sapiens GN=CNOT1 PE=1 SV=1 - [H3BMZ2_HUMAN]		2
H3BNT7	26S proteasome non-ATPase regulatory subunit 7 OS=Homo sapiens GN=PSMD7 PE=1 SV=1 - [H3BNT7_HUMAN]		1
H3BPS8	Fructose-bisphosphate aldolase A (Fragment) OS=Homo sapiens GN=ALDOA PE=1 SV=1 - [H3BPS8_HUMAN]			3
H3BRU6	Poly(rC)-binding protein 2 (Fragment) OS=Homo sapiens GN=PCBP2 PE=1 SV=1 - [H3BRU6_HUMAN]		17
H3BSK4	E3 ubiquitin-protein ligase ARIH1 OS=Homo sapiens GN=ARIH1 PE=1 SV=1 - [H3BSK4_HUMAN]		1
H3BSZ7	NFATC2-interacting protein OS=Homo sapiens GN=NFATC2IP PE=1 SV=1 - [H3BSZ7_HUMAN]		2
H3BT57	Protein PML OS=Homo sapiens GN=PML PE=1 SV=1 - [H3BT57_HUMAN]		10
H3BV90	Fe-S cluster assembly protein DRE2 OS=Homo sapiens GN=CIAPIN1 PE=1 SV=1 - [H3BV90_HUMAN]		4
H7BXH8	Heterogeneous nuclear ribonucleoprotein L-like (Fragment) OS=Homo sapiens GN=HNRNPLL PE=1 SV=1 - [H7BXH8_HUMAN]		3
H7BXT2	EF-hand calcium-binding domain-containing protein 4B (Fragment) OS=Homo sapiens GN=CRACR2A PE=1 SV=1 - [H7BXT2_HUMAN]		1
H7BZF8	HAUS augmin-like complex subunit 7 (Fragment) OS=Homo sapiens GN=HAUS7 PE=1 SV=1 - [H7BZF8_HUMAN]		1
H7BZJ3	Protein disulfide-isomerase A3 (Fragment) OS=Homo sapiens GN=PDIA3 PE=1 SV=1 - [H7BZJ3_HUMAN]		1
H7C048	SWI/SNF-related matrix-associated actin-dependent regulator of chromatin subfamily E member 1 (Fragment) OS=Homo sapiens GN=SMARCE1 PE=1 SV=1 - [H7C048_HUMAN]		2
H7C0R3	Glutamine--tRNA ligase (Fragment) OS=Homo sapiens GN=QARS PE=1 SV=1 - [H7C0R3_HUMAN]		3
H7C1D4	Translin (Fragment) OS=Homo sapiens GN=TSN PE=1 SV=1 - [H7C1D4_HUMAN]		1
H7C1Z6	Endophilin-B2 (Fragment) OS=Homo sapiens GN=SH3GLB2 PE=1 SV=1 - [H7C1Z6_HUMAN]		1
H7C3F9	Actin-related protein 2/3 complex subunit 2 (Fragment) OS=Homo sapiens GN=ARPC2 PE=1 SV=1 - [H7C3F9_HUMAN]		1
H7C3V8	Holliday junction recognition protein (Fragment) OS=Homo sapiens GN=HJURP PE=1 SV=1 - [H7C3V8_HUMAN]		1
H7C488	Leucine zipper transcription factor-like protein 1 (Fragment) OS=Homo sapiens GN=LZTFL1 PE=1 SV=1 - [H7C488_HUMAN]		2
H7C531	26S proteasome non-ATPase regulatory subunit 6 (Fragment) OS=Homo sapiens GN=PSMD6 PE=1 SV=1 - [H7C531_HUMAN]		1
H7C5N1	NEDD8 ultimate buster 1 (Fragment) OS=Homo sapiens GN=NUB1 PE=1 SV=1 - [H7C5N1_HUMAN]		4
H7C5S7	Replication factor C subunit 2 (Fragment) OS=Homo sapiens GN=RFC2 PE=1 SV=1 - [H7C5S7_HUMAN]		1
I3L0N3	Vesicle-fusing ATPase OS=Homo sapiens GN=NSF PE=1 SV=1 - [I3L0N3_HUMAN]		1
I3L0S1	Phosphoribosyl pyrophosphate synthase-associated protein 2 (Fragment) OS=Homo sapiens GN=PRPSAP2 PE=1 SV=1 - [I3L0S1_HUMAN]		3
I3L159	Heme oxygenase 2 (Fragment) OS=Homo sapiens GN=HMOX2 PE=1 SV=1 - [I3L159_HUMAN]		1
I3L1A4	NF-kappa-B inhibitor beta (Fragment) OS=Homo sapiens GN=NFKBIB PE=1 SV=1 - [I3L1A4_HUMAN]		1
I3L1H9	Zymogen granule protein 16 homolog B (Fragment) OS=Homo sapiens GN=ZG16B PE=1 SV=1 - [I3L1H9_HUMAN]		1
I3L3A9	Telomerase-binding protein EST1A (Fragment) OS=Homo sapiens GN=SMG6 PE=1 SV=1 - [I3L3A9_HUMAN]		1
I3L3K7	Nuclear factor of-activated T-cells, cytoplasmic 3 OS=Homo sapiens GN=NFATC3 PE=1 SV=1 - [I3L3K7_HUMAN]		2
I3L3N5	Platelet-activating factor acetylhydrolase IB subunit alpha (Fragment) OS=Homo sapiens GN=PAFAH1B1 PE=1 SV=1 - [I3L3N5_HUMAN]		1
I3L4J1	Uncharacterized protein (Fragment) OS=Homo sapiens PE=1 SV=3 - [I3L4J1_HUMAN]		1
I3NI03	Protein disulfide-isomerase (Fragment) OS=Homo sapiens GN=P4HB PE=1 SV=1 - [I3NI03_HUMAN]			2
J3KNK1	Mitogen-activated protein kinase 9 OS=Homo sapiens GN=MAPK9 PE=1 SV=1 - [J3KNK1_HUMAN]		2
J3KRE2	Rho GDP-dissociation inhibitor 1 OS=Homo sapiens GN=ARHGDIA PE=1 SV=1 - [J3KRE2_HUMAN]		2
J3KRL2	Lysine--tRNA ligase (Fragment) OS=Homo sapiens GN=KARS PE=1 SV=1 - [J3KRL2_HUMAN]		1
J3KSH3	Nuclear pore complex protein Nup85 (Fragment) OS=Homo sapiens GN=NUP85 PE=1 SV=1 - [J3KSH3_HUMAN]		1
J3KTM9	Importin subunit beta-1 (Fragment) OS=Homo sapiens GN=KPNB1 PE=1 SV=1 - [J3KTM9_HUMAN]			1
J3QL05	Serine/arginine-rich-splicing factor 2 (Fragment) OS=Homo sapiens GN=SRSF2 PE=1 SV=1 - [J3QL05_HUMAN]		1
J3QL15	Ribosomal protein L19 (Fragment) OS=Homo sapiens GN=RPL19 PE=1 SV=1 - [J3QL15_HUMAN]		2
J3QR01	Centromere protein X (Fragment) OS=Homo sapiens GN=STRA13 PE=1 SV=1 - [J3QR01_HUMAN]		1
J3QRU8	ARF GTPase-activating protein GIT1 OS=Homo sapiens GN=GIT1 PE=1 SV=1 - [J3QRU8_HUMAN]		5
J3QRY4	26S proteasome non-ATPase regulatory subunit 11 (Fragment) OS=Homo sapiens GN=PSMD11 PE=1 SV=6 - [J3QRY4_HUMAN]		2
J3QSA3	Polyubiquitin-B (Fragment) OS=Homo sapiens GN=UBB PE=1 SV=1 - [J3QSA3_HUMAN]			1
J3QSE0	26S protease regulatory subunit 8 OS=Homo sapiens GN=PSMC5 PE=1 SV=1 - [J3QSE0_HUMAN]		1
J3QSE8	Fanconi anemia group J protein OS=Homo sapiens GN=BRIP1 PE=1 SV=1 - [J3QSE8_HUMAN]		1
K7EIJ4	Ran-binding protein 3 (Fragment) OS=Homo sapiens GN=RANBP3 PE=1 SV=1 - [K7EIJ4_HUMAN]		1
K7EJ49	Kelch-like ECH-associated protein 1 (Fragment) OS=Homo sapiens GN=KEAP1 PE=1 SV=1 - [K7EJ49_HUMAN]		1
K7EK42	Tubulin-folding cofactor B OS=Homo sapiens GN=TBCB PE=1 SV=1 - [K7EK42_HUMAN]		2
K7EK45	Polypyrimidine tract-binding protein 1 (Fragment) OS=Homo sapiens GN=PTBP1 PE=1 SV=1 - [K7EK45_HUMAN]			1
K7EK60	Formin-like protein 1 OS=Homo sapiens GN=FMNL1 PE=1 SV=1 - [K7EK60_HUMAN]		4
K7EKH5	Fructose-bisphosphate aldolase C (Fragment) OS=Homo sapiens GN=ALDOC PE=1 SV=1 - [K7EKH5_HUMAN]			1
K7EL50	Calreticulin (Fragment) OS=Homo sapiens GN=CALR PE=1 SV=1 - [K7EL50_HUMAN]		2
K7ELW9	Histone chaperone ASF1B OS=Homo sapiens GN=ASF1B PE=1 SV=1 - [K7ELW9_HUMAN]		5
K7EMY7	Haloacid dehalogenase-like hydrolase domain-containing protein 2 (Fragment) OS=Homo sapiens GN=HDHD2 PE=1 SV=1 - [K7EMY7_HUMAN]		1
K7EMZ9	Protein LSM14 homolog A (Fragment) OS=Homo sapiens GN=LSM14A PE=1 SV=2 - [K7EMZ9_HUMAN]		1
K7EN35	Beclin-1 (Fragment) OS=Homo sapiens GN=BECN1 PE=1 SV=1 - [K7EN35_HUMAN]			1
K7EN66	2',3'-cyclic-nucleotide 3'-phosphodiesterase (Fragment) OS=Homo sapiens GN=CNP PE=1 SV=1 - [K7EN66_HUMAN]		2
K7EPP7	DnaJ homolog subfamily C member 7 OS=Homo sapiens GN=DNAJC7 PE=1 SV=1 - [K7EPP7_HUMAN]		3
K7EQ54	Lysine-specific demethylase 4B (Fragment) OS=Homo sapiens GN=KDM4B PE=1 SV=2 - [K7EQ54_HUMAN]		1
K7EQA8	Histone-arginine methyltransferase CARM1 (Fragment) OS=Homo sapiens GN=CARM1 PE=1 SV=1 - [K7EQA8_HUMAN]		2
K7EQY6	tRNA (guanine(26)-N(2))-dimethyltransferase OS=Homo sapiens GN=TRMT1 PE=1 SV=1 - [K7EQY6_HUMAN]		1
K7ER53	Nuclear factor of-activated T-cells, cytoplasmic 1 OS=Homo sapiens GN=NFATC1 PE=1 SV=1 - [K7ER53_HUMAN]		1
K7ERJ9	Galactokinase OS=Homo sapiens GN=GALK1 PE=1 SV=1 - [K7ERJ9_HUMAN]		1
K7ES31	Eukaryotic translation initiation factor 3 subunit K OS=Homo sapiens GN=EIF3K PE=1 SV=1 - [K7ES31_HUMAN]		1
K7ES74	Glutaryl-CoA dehydrogenase, mitochondrial (Fragment) OS=Homo sapiens GN=GCDH PE=1 SV=1 - [K7ES74_HUMAN]		2
K7ES92	Minor histocompatibility protein HA-1 OS=Homo sapiens GN=HMHA1 PE=1 SV=1 - [K7ES92_HUMAN]		1
L7N2F4	Alanyl-tRNA-editing protein Aarsd1 (Fragment) OS=Homo sapiens GN=AARSD1 PE=1 SV=1 - [L7N2F4_HUMAN]		1
M0QXU7	Mitochondrial import inner membrane translocase subunit TIM44 (Fragment) OS=Homo sapiens GN=TIMM44 PE=1 SV=1 - [M0QXU7_HUMAN]		1
M0QXZ3	Complement C3 (Fragment) OS=Homo sapiens GN=C3 PE=1 SV=1 - [M0QXZ3_HUMAN]			1
M0QYM8	SUMO-activating enzyme subunit 1 (Fragment) OS=Homo sapiens GN=SAE1 PE=1 SV=1 - [M0QYM8_HUMAN]		1
M0QYT0	Uncharacterized protein (Fragment) OS=Homo sapiens PE=1 SV=1 - [M0QYT0_HUMAN]			1
M0QZN2	40S ribosomal protein S5 OS=Homo sapiens GN=RPS5 PE=1 SV=1 - [M0QZN2_HUMAN]		3
M0QZP0	Transcription regulator protein BACH1 (Fragment) OS=Homo sapiens GN=BACH1 PE=1 SV=1 - [M0QZP0_HUMAN]		1
M0QZR8	DNA polymerase OS=Homo sapiens GN=POLD1 PE=1 SV=1 - [M0QZR8_HUMAN]		10
M0QZS0	Rho guanine nucleotide exchange factor 18 (Fragment) OS=Homo sapiens GN=ARHGEF18 PE=1 SV=1 - [M0QZS0_HUMAN]		1
M0R019	Heterogeneous nuclear ribonucleoprotein M (Fragment) OS=Homo sapiens GN=HNRNPM PE=1 SV=6 - [M0R019_HUMAN]			1
M0R080	DnaJ homolog subfamily B member 1 (Fragment) OS=Homo sapiens GN=DNAJB1 PE=1 SV=1 - [M0R080_HUMAN]		1
M0R0C3	Mitochondrial import inner membrane translocase subunit TIM50 (Fragment) OS=Homo sapiens GN=TIMM50 PE=1 SV=1 - [M0R0C3_HUMAN]		2
M0R0R8	Interferon regulatory factor 3 (Fragment) OS=Homo sapiens GN=IRF3 PE=1 SV=1 - [M0R0R8_HUMAN]		1
M0R1V7	Ubiquitin-60S ribosomal protein L40 (Fragment) OS=Homo sapiens GN=UBA52 PE=1 SV=1 - [M0R1V7_HUMAN]		11
M0R2H5	Serine--tRNA ligase, mitochondrial OS=Homo sapiens GN=SARS2 PE=1 SV=1 - [M0R2H5_HUMAN]		1
M0R2U2	rRNA 2'-O-methyltransferase fibrillarin (Fragment) OS=Homo sapiens GN=FBL PE=1 SV=1 - [M0R2U2_HUMAN]		2
M0R328	Peroxisomal membrane protein 11C (Fragment) OS=Homo sapiens GN=PEX11G PE=1 SV=1 - [M0R328_HUMAN]			1
M0R3D6	60S ribosomal protein L18a (Fragment) OS=Homo sapiens GN=RPL18A PE=1 SV=1 - [M0R3D6_HUMAN]		2
M0R3F4	BRISC and BRCA1-A complex member 1 (Fragment) OS=Homo sapiens GN=BABAM1 PE=1 SV=1 - [M0R3F4_HUMAN]		3
O00116	Alkyldihydroxyacetonephosphate synthase, peroxisomal OS=Homo sapiens GN=AGPS PE=1 SV=1 - [ADAS_HUMAN]		2
O00232	26S proteasome non-ATPase regulatory subunit 12 OS=Homo sapiens GN=PSMD12 PE=1 SV=3 - [PSD12_HUMAN]		6
O00303	Eukaryotic translation initiation factor 3 subunit F OS=Homo sapiens GN=EIF3F PE=1 SV=1 - [EIF3F_HUMAN]		1
O00330	Pyruvate dehydrogenase protein X component, mitochondrial OS=Homo sapiens GN=PDHX PE=1 SV=3 - [ODPX_HUMAN]		1
O00507	Probable ubiquitin carboxyl-terminal hydrolase FAF-Y OS=Homo sapiens GN=USP9Y PE=2 SV=2 - [USP9Y_HUMAN]		1
O00562	Membrane-associated phosphatidylinositol transfer protein 1 OS=Homo sapiens GN=PITPNM1 PE=1 SV=4 - [PITM1_HUMAN]		1
O14818	Proteasome subunit alpha type-7 OS=Homo sapiens GN=PSMA7 PE=1 SV=1 - [PSA7_HUMAN]		3
O14925	Mitochondrial import inner membrane translocase subunit Tim23 OS=Homo sapiens GN=TIMM23 PE=1 SV=1 - [TIM23_HUMAN]			1
O43379	WD repeat-containing protein 62 OS=Homo sapiens GN=WDR62 PE=1 SV=4 - [WDR62_HUMAN]		1
O43707	Alpha-actinin-4 OS=Homo sapiens GN=ACTN4 PE=1 SV=2 - [ACTN4_HUMAN]		5
O43719	HIV Tat-specific factor 1 OS=Homo sapiens GN=HTATSF1 PE=1 SV=1 - [HTSF1_HUMAN]		1
O43736	Integral membrane protein 2A OS=Homo sapiens GN=ITM2A PE=1 SV=2 - [ITM2A_HUMAN]		1
O43765	Small glutamine-rich tetratricopeptide repeat-containing protein alpha OS=Homo sapiens GN=SGTA PE=1 SV=1 - [SGTA_HUMAN]		2
O43776	Asparagine--tRNA ligase, cytoplasmic OS=Homo sapiens GN=NARS PE=1 SV=1 - [SYNC_HUMAN]		2
O43815	Striatin OS=Homo sapiens GN=STRN PE=1 SV=4 - [STRN_HUMAN]		2
O43823	A-kinase anchor protein 8 OS=Homo sapiens GN=AKAP8 PE=1 SV=1 - [AKAP8_HUMAN]		1
O60477	BMP/retinoic acid-inducible neural-specific protein 1 OS=Homo sapiens GN=BRINP1 PE=1 SV=2 - [BRNP1_HUMAN]			1
O60518	Ran-binding protein 6 OS=Homo sapiens GN=RANBP6 PE=1 SV=2 - [RNBP6_HUMAN]		7
O75578	Integrin alpha-10 OS=Homo sapiens GN=ITGA10 PE=2 SV=2 - [ITA10_HUMAN]		1
O75821	Eukaryotic translation initiation factor 3 subunit G OS=Homo sapiens GN=EIF3G PE=1 SV=2 - [EIF3G_HUMAN]		2
O75923	Dysferlin OS=Homo sapiens GN=DYSF PE=1 SV=1 - [DYSF_HUMAN]		1
O94888	UBX domain-containing protein 7 OS=Homo sapiens GN=UBXN7 PE=1 SV=2 - [UBXN7_HUMAN]		3
O95231	Homeobox protein VENTX OS=Homo sapiens GN=VENTX PE=1 SV=1 - [VENTX_HUMAN]		1
O95747	Serine/threonine-protein kinase OSR1 OS=Homo sapiens GN=OXSR1 PE=1 SV=1 - [OXSR1_HUMAN]		5
O96028	Histone-lysine N-methyltransferase NSD2 OS=Homo sapiens GN=WHSC1 PE=1 SV=1 - [NSD2_HUMAN]		3
P00491	Purine nucleoside phosphorylase OS=Homo sapiens GN=PNP PE=1 SV=2 - [PNPH_HUMAN]		4
P01008	Antithrombin-III OS=Homo sapiens GN=SERPINC1 PE=1 SV=1 - [ANT3_HUMAN]			1
P01834	Ig kappa chain C region OS=Homo sapiens GN=IGKC PE=1 SV=1 - [IGKC_HUMAN]		4	6
P01857	Ig gamma-1 chain C region OS=Homo sapiens GN=IGHG1 PE=1 SV=1 - [IGHG1_HUMAN]			2
P01859	Ig gamma-2 chain C region OS=Homo sapiens GN=IGHG2 PE=1 SV=2 - [IGHG2_HUMAN]			1
P02461	Collagen alpha-1(III) chain OS=Homo sapiens GN=COL3A1 PE=1 SV=4 - [CO3A1_HUMAN]		1
P02765	Alpha-2-HS-glycoprotein OS=Homo sapiens GN=AHSG PE=1 SV=1 - [FETUA_HUMAN]		1
P02768	Serum albumin OS=Homo sapiens GN=ALB PE=1 SV=2 - [ALBU_HUMAN]		105
P04150	Glucocorticoid receptor OS=Homo sapiens GN=NR3C1 PE=1 SV=1 - [GCR_HUMAN]		1
P04818	Thymidylate synthase OS=Homo sapiens GN=TYMS PE=1 SV=3 - [TYSY_HUMAN]		1
P05388	60S acidic ribosomal protein P0 OS=Homo sapiens GN=RPLP0 PE=1 SV=1 - [RLA0_HUMAN]		15
P06730	Eukaryotic translation initiation factor 4E OS=Homo sapiens GN=EIF4E PE=1 SV=2 - [IF4E_HUMAN]		1
P07339	Cathepsin D OS=Homo sapiens GN=CTSD PE=1 SV=1 - [CATD_HUMAN]		3
P07814	Bifunctional glutamate/proline--tRNA ligase OS=Homo sapiens GN=EPRS PE=1 SV=5 - [SYEP_HUMAN]		3
P09874	Poly [ADP-ribose] polymerase 1 OS=Homo sapiens GN=PARP1 PE=1 SV=4 - [PARP1_HUMAN]		3
P0C221	Coiled-coil domain-containing protein 175 OS=Homo sapiens GN=CCDC175 PE=4 SV=2 - [CC175_HUMAN]		1
P0DMV9	Heat shock 70 kDa protein 1B OS=Homo sapiens GN=HSPA1B PE=1 SV=1 - [HS71B_HUMAN]		13
P10155	60 kDa SS-A/Ro ribonucleoprotein OS=Homo sapiens GN=TROVE2 PE=1 SV=2 - [RO60_HUMAN]		3
P12035	Keratin, type II cytoskeletal 3 OS=Homo sapiens GN=KRT3 PE=1 SV=3 - [K2C3_HUMAN]		18
P13674	Prolyl 4-hydroxylase subunit alpha-1 OS=Homo sapiens GN=P4HA1 PE=1 SV=2 - [P4HA1_HUMAN]		2
P14735	Insulin-degrading enzyme OS=Homo sapiens GN=IDE PE=1 SV=4 - [IDE_HUMAN]		1
P14866	Heterogeneous nuclear ribonucleoprotein L OS=Homo sapiens GN=HNRNPL PE=1 SV=2 - [HNRPL_HUMAN]		25
P15531	Nucleoside diphosphate kinase A OS=Homo sapiens GN=NME1 PE=1 SV=1 - [NDKA_HUMAN]		9
P16401	Histone H1.5 OS=Homo sapiens GN=HIST1H1B PE=1 SV=3 - [H15_HUMAN]		1
P17858	ATP-dependent 6-phosphofructokinase, liver type OS=Homo sapiens GN=PFKL PE=1 SV=6 - [PFKAL_HUMAN]		5
P19013	Keratin, type II cytoskeletal 4 OS=Homo sapiens GN=KRT4 PE=1 SV=4 - [K2C4_HUMAN]		12	6
P19105	Myosin regulatory light chain 12A OS=Homo sapiens GN=MYL12A PE=1 SV=2 - [ML12A_HUMAN]		1
P20585	DNA mismatch repair protein Msh3 OS=Homo sapiens GN=MSH3 PE=1 SV=4 - [MSH3_HUMAN]		1
P21399	Cytoplasmic aconitate hydratase OS=Homo sapiens GN=ACO1 PE=1 SV=3 - [ACOC_HUMAN]		1
P22735	Protein-glutamine gamma-glutamyltransferase K OS=Homo sapiens GN=TGM1 PE=1 SV=4 - [TGM1_HUMAN]		1
P23193	Transcription elongation factor A protein 1 OS=Homo sapiens GN=TCEA1 PE=1 SV=2 - [TCEA1_HUMAN]		1
P24752	Acetyl-CoA acetyltransferase, mitochondrial OS=Homo sapiens GN=ACAT1 PE=1 SV=1 - [THIL_HUMAN]		1
P25311	Zinc-alpha-2-glycoprotein OS=Homo sapiens GN=AZGP1 PE=1 SV=2 - [ZA2G_HUMAN]		14
P26358	DNA (cytosine-5)-methyltransferase 1 OS=Homo sapiens GN=DNMT1 PE=1 SV=2 - [DNMT1_HUMAN]		2
P27707	Deoxycytidine kinase OS=Homo sapiens GN=DCK PE=1 SV=1 - [DCK_HUMAN]		2
P27816	Microtubule-associated protein 4 OS=Homo sapiens GN=MAP4 PE=1 SV=3 - [MAP4_HUMAN]		3
P29144	Tripeptidyl-peptidase 2 OS=Homo sapiens GN=TPP2 PE=1 SV=4 - [TPP2_HUMAN]		4
P29508	Serpin B3 OS=Homo sapiens GN=SERPINB3 PE=1 SV=2 - [SPB3_HUMAN]		6
P29803	Pyruvate dehydrogenase E1 component subunit alpha, testis-specific form, mitochondrial OS=Homo sapiens GN=PDHA2 PE=1 SV=1 - [ODPAT_HUMAN]		1
P30041	Peroxiredoxin-6 OS=Homo sapiens GN=PRDX6 PE=1 SV=3 - [PRDX6_HUMAN]		1
P30154	Serine/threonine-protein phosphatase 2A 65 kDa regulatory subunit A beta isoform OS=Homo sapiens GN=PPP2R1B PE=1 SV=3 - [2AAB_HUMAN]		10
P30679	Guanine nucleotide-binding protein subunit alpha-15 OS=Homo sapiens GN=GNA15 PE=1 SV=2 - [GNA15_HUMAN]		1
P31151	Protein S100-A7 OS=Homo sapiens GN=S100A7 PE=1 SV=4 - [S10A7_HUMAN]		3
P31947	14-3-3 protein sigma OS=Homo sapiens GN=SFN PE=1 SV=1 - [1433S_HUMAN]			1
P33176	Kinesin-1 heavy chain OS=Homo sapiens GN=KIF5B PE=1 SV=1 - [KINH_HUMAN]		2
P33240	Cleavage stimulation factor subunit 2 OS=Homo sapiens GN=CSTF2 PE=1 SV=1 - [CSTF2_HUMAN]		2
P34896	Serine hydroxymethyltransferase, cytosolic OS=Homo sapiens GN=SHMT1 PE=1 SV=1 - [GLYC_HUMAN]		2
P35998	26S protease regulatory subunit 7 OS=Homo sapiens GN=PSMC2 PE=1 SV=3 - [PRS7_HUMAN]		7
P36957	Dihydrolipoyllysine-residue succinyltransferase component of 2-oxoglutarate dehydrogenase complex, mitochondrial OS=Homo sapiens GN=DLST PE=1 SV=4 - [ODO2_HUMAN]		3
P38606	V-type proton ATPase catalytic subunit A OS=Homo sapiens GN=ATP6V1A PE=1 SV=2 - [VATA_HUMAN]		3
P40879	Chloride anion exchanger OS=Homo sapiens GN=SLC26A3 PE=1 SV=1 - [S26A3_HUMAN]		1
P46934	E3 ubiquitin-protein ligase NEDD4 OS=Homo sapiens GN=NEDD4 PE=1 SV=4 - [NEDD4_HUMAN]		2
P47929	Galectin-7 OS=Homo sapiens GN=LGALS7 PE=1 SV=2 - [LEG7_HUMAN]			2
P48506	Glutamate--cysteine ligase catalytic subunit OS=Homo sapiens GN=GCLC PE=1 SV=2 - [GSH1_HUMAN]		7
P48507	Glutamate--cysteine ligase regulatory subunit OS=Homo sapiens GN=GCLM PE=1 SV=1 - [GSH0_HUMAN]		2
P48643	T-complex protein 1 subunit epsilon OS=Homo sapiens GN=CCT5 PE=1 SV=1 - [TCPE_HUMAN]		20
P49006	MARCKS-related protein OS=Homo sapiens GN=MARCKSL1 PE=1 SV=2 - [MRP_HUMAN]		1
P49189	4-trimethylaminobutyraldehyde dehydrogenase OS=Homo sapiens GN=ALDH9A1 PE=1 SV=3 - [AL9A1_HUMAN]		1
P49247	Ribose-5-phosphate isomerase OS=Homo sapiens GN=RPIA PE=1 SV=3 - [RPIA_HUMAN]		1
P49368	T-complex protein 1 subunit gamma OS=Homo sapiens GN=CCT3 PE=1 SV=4 - [TCPG_HUMAN]		33
P50416	Carnitine O-palmitoyltransferase 1, liver isoform OS=Homo sapiens GN=CPT1A PE=1 SV=2 - [CPT1A_HUMAN]		1
P51148	Ras-related protein Rab-5C OS=Homo sapiens GN=RAB5C PE=1 SV=2 - [RAB5C_HUMAN]		2
P52294	Importin subunit alpha-5 OS=Homo sapiens GN=KPNA1 PE=1 SV=3 - [IMA5_HUMAN]		3
P52564	Dual specificity mitogen-activated protein kinase kinase 6 OS=Homo sapiens GN=MAP2K6 PE=1 SV=1 - [MP2K6_HUMAN]		1
P55160	Nck-associated protein 1-like OS=Homo sapiens GN=NCKAP1L PE=1 SV=3 - [NCKPL_HUMAN]		3
P57075	Ubiquitin-associated and SH3 domain-containing protein A OS=Homo sapiens GN=UBASH3A PE=1 SV=1 - [UBS3A_HUMAN]		2
P61160	Actin-related protein 2 OS=Homo sapiens GN=ACTR2 PE=1 SV=1 - [ARP2_HUMAN]		1
P61956	Small ubiquitin-related modifier 2 OS=Homo sapiens GN=SUMO2 PE=1 SV=3 - [SUMO2_HUMAN]		1
P61962	DDB1- and CUL4-associated factor 7 OS=Homo sapiens GN=DCAF7 PE=1 SV=1 - [DCAF7_HUMAN]		1
P62140	Serine/threonine-protein phosphatase PP1-beta catalytic subunit OS=Homo sapiens GN=PPP1CB PE=1 SV=3 - [PP1B_HUMAN]		7
P62333	26S protease regulatory subunit 10B OS=Homo sapiens GN=PSMC6 PE=1 SV=1 - [PRS10_HUMAN]		4
P62826	GTP-binding nuclear protein Ran OS=Homo sapiens GN=RAN PE=1 SV=3 - [RAN_HUMAN]		2
P62851	40S ribosomal protein S25 OS=Homo sapiens GN=RPS25 PE=1 SV=1 - [RS25_HUMAN]		1
P62917	60S ribosomal protein L8 OS=Homo sapiens GN=RPL8 PE=1 SV=2 - [RL8_HUMAN]		3
P62995	Transformer-2 protein homolog beta OS=Homo sapiens GN=TRA2B PE=1 SV=1 - [TRA2B_HUMAN]		2
P78362	SRSF protein kinase 2 OS=Homo sapiens GN=SRPK2 PE=1 SV=3 - [SRPK2_HUMAN]		1
P85037	Forkhead box protein K1 OS=Homo sapiens GN=FOXK1 PE=1 SV=1 - [FOXK1_HUMAN]		2
P98171	Rho GTPase-activating protein 4 OS=Homo sapiens GN=ARHGAP4 PE=1 SV=2 - [RHG04_HUMAN]		3
Q01085	Nucleolysin TIAR OS=Homo sapiens GN=TIAL1 PE=1 SV=1 - [TIAR_HUMAN]		1
Q01518	Adenylyl cyclase-associated protein 1 OS=Homo sapiens GN=CAP1 PE=1 SV=5 - [CAP1_HUMAN]		3
Q01650	Large neutral amino acids transporter small subunit 1 OS=Homo sapiens GN=SLC7A5 PE=1 SV=2 - [LAT1_HUMAN]		1
Q04759	Protein kinase C theta type OS=Homo sapiens GN=PRKCQ PE=1 SV=3 - [KPCT_HUMAN]		4
Q06587	E3 ubiquitin-protein ligase RING1 OS=Homo sapiens GN=RING1 PE=1 SV=2 - [RING1_HUMAN]		1
Q07955	Serine/arginine-rich splicing factor 1 OS=Homo sapiens GN=SRSF1 PE=1 SV=2 - [SRSF1_HUMAN]		12
Q08AM6	Protein VAC14 homolog OS=Homo sapiens GN=VAC14 PE=1 SV=1 - [VAC14_HUMAN]		2
Q09666	Neuroblast differentiation-associated protein AHNAK OS=Homo sapiens GN=AHNAK PE=1 SV=2 - [AHNK_HUMAN]		1
Q10567	AP-1 complex subunit beta-1 OS=Homo sapiens GN=AP1B1 PE=1 SV=2 - [AP1B1_HUMAN]		5
Q10570	Cleavage and polyadenylation specificity factor subunit 1 OS=Homo sapiens GN=CPSF1 PE=1 SV=2 - [CPSF1_HUMAN]		1
Q12888	Tumor suppressor p53-binding protein 1 OS=Homo sapiens GN=TP53BP1 PE=1 SV=2 - [TP53B_HUMAN]		13
Q12931	Heat shock protein 75 kDa, mitochondrial OS=Homo sapiens GN=TRAP1 PE=1 SV=3 - [TRAP1_HUMAN]		3
Q13131	5'-AMP-activated protein kinase catalytic subunit alpha-1 OS=Homo sapiens GN=PRKAA1 PE=1 SV=4 - [AAPK1_HUMAN]		1
Q13148	TAR DNA-binding protein 43 OS=Homo sapiens GN=TARDBP PE=1 SV=1 - [TADBP_HUMAN]		9
Q13151	Heterogeneous nuclear ribonucleoprotein A0 OS=Homo sapiens GN=HNRNPA0 PE=1 SV=1 - [ROA0_HUMAN]		4
Q13247	Serine/arginine-rich splicing factor 6 OS=Homo sapiens GN=SRSF6 PE=1 SV=2 - [SRSF6_HUMAN]		2
Q13283	Ras GTPase-activating protein-binding protein 1 OS=Homo sapiens GN=G3BP1 PE=1 SV=1 - [G3BP1_HUMAN]		1
Q13451	Peptidyl-prolyl cis-trans isomerase FKBP5 OS=Homo sapiens GN=FKBP5 PE=1 SV=2 - [FKBP5_HUMAN]		1
Q13618	Cullin-3 OS=Homo sapiens GN=CUL3 PE=1 SV=2 - [CUL3_HUMAN]		2
Q13882	Protein-tyrosine kinase 6 OS=Homo sapiens GN=PTK6 PE=1 SV=1 - [PTK6_HUMAN]		1
Q14151	Scaffold attachment factor B2 OS=Homo sapiens GN=SAFB2 PE=1 SV=1 - [SAFB2_HUMAN]		4
Q14152	Eukaryotic translation initiation factor 3 subunit A OS=Homo sapiens GN=EIF3A PE=1 SV=1 - [EIF3A_HUMAN]		1
Q14207	Protein NPAT OS=Homo sapiens GN=NPAT PE=1 SV=3 - [NPAT_HUMAN]		3
Q14574	Desmocollin-3 OS=Homo sapiens GN=DSC3 PE=1 SV=3 - [DSC3_HUMAN]		2
Q147X3	N-alpha-acetyltransferase 30 OS=Homo sapiens GN=NAA30 PE=1 SV=1 - [NAA30_HUMAN]		5
Q15013	MAD2L1-binding protein OS=Homo sapiens GN=MAD2L1BP PE=1 SV=1 - [MD2BP_HUMAN]		1
Q15019	Septin-2 OS=Homo sapiens GN=SEPT2 PE=1 SV=1 - [SEPT2_HUMAN]		3
Q15024	Exosome complex component RRP42 OS=Homo sapiens GN=EXOSC7 PE=1 SV=3 - [EXOS7_HUMAN]		1
Q15056	Eukaryotic translation initiation factor 4H OS=Homo sapiens GN=EIF4H PE=1 SV=5 - [IF4H_HUMAN]		2
Q15067	Peroxisomal acyl-coenzyme A oxidase 1 OS=Homo sapiens GN=ACOX1 PE=1 SV=3 - [ACOX1_HUMAN]		2
Q15185	Prostaglandin E synthase 3 OS=Homo sapiens GN=PTGES3 PE=1 SV=1 - [TEBP_HUMAN]		1
Q15276	Rab GTPase-binding effector protein 1 OS=Homo sapiens GN=RABEP1 PE=1 SV=2 - [RABE1_HUMAN]		2
Q15459	Splicing factor 3A subunit 1 OS=Homo sapiens GN=SF3A1 PE=1 SV=1 - [SF3A1_HUMAN]		1
Q15542	Transcription initiation factor TFIID subunit 5 OS=Homo sapiens GN=TAF5 PE=1 SV=3 - [TAF5_HUMAN]		1
Q15758	Neutral amino acid transporter B(0) OS=Homo sapiens GN=SLC1A5 PE=1 SV=2 - [AAAT_HUMAN]		1
Q15910	Histone-lysine N-methyltransferase EZH2 OS=Homo sapiens GN=EZH2 PE=1 SV=2 - [EZH2_HUMAN]		1
Q32MZ4	Leucine-rich repeat flightless-interacting protein 1 OS=Homo sapiens GN=LRRFIP1 PE=1 SV=2 - [LRRF1_HUMAN]		2
Q3KQU3	MAP7 domain-containing protein 1 OS=Homo sapiens GN=MAP7D1 PE=1 SV=1 - [MA7D1_HUMAN]		1
Q4G0X5	E3 ubiquitin-protein ligase E3D OS=Homo sapiens GN=UBE2CBP PE=1 SV=1 - [Q4G0X5_HUMAN]		1
Q52LJ0	Protein FAM98B OS=Homo sapiens GN=FAM98B PE=1 SV=1 - [FA98B_HUMAN]		1
Q53GQ0	Very-long-chain 3-oxoacyl-CoA reductase OS=Homo sapiens GN=HSD17B12 PE=1 SV=2 - [DHB12_HUMAN]		1
Q58EX7	Puratrophin-1 OS=Homo sapiens GN=PLEKHG4 PE=1 SV=1 - [PKHG4_HUMAN]		1
Q5FC10	Cytokine receptor common subunit gamma OS=Homo sapiens GN=IL2RG PE=1 SV=1 - [Q5FC10_HUMAN]		1
Q5H909	Melanoma-associated antigen D2 OS=Homo sapiens GN=MAGED2 PE=1 SV=2 - [Q5H909_HUMAN]		1
Q5HY57	Emerin OS=Homo sapiens GN=EMD PE=1 SV=1 - [Q5HY57_HUMAN]		1
Q5HYB6	Epididymis luminal protein 189 OS=Homo sapiens GN=DKFZp686J1372 PE=1 SV=1 - [Q5HYB6_HUMAN]		9
Q5JP53	Tubulin beta chain OS=Homo sapiens GN=TUBB PE=1 SV=1 - [Q5JP53_HUMAN]			29
Q5JSQ8	Putative KHDC1-like protein OS=Homo sapiens GN=KHDC1L PE=5 SV=1 - [KHDCL_HUMAN]		1
Q5JY01	tRNA (guanine(10)-N2)-methyltransferase homolog (Fragment) OS=Homo sapiens GN=TRMT11 PE=1 SV=1 - [Q5JY01_HUMAN]		1
Q5QPE1	Protein transport protein Sec23B (Fragment) OS=Homo sapiens GN=SEC23B PE=1 SV=1 - [Q5QPE1_HUMAN]		2
Q5QPM0	RNA-binding protein Raly (Fragment) OS=Homo sapiens GN=RALY PE=1 SV=6 - [Q5QPM0_HUMAN]		1
Q5RKV6	Exosome complex component MTR3 OS=Homo sapiens GN=EXOSC6 PE=1 SV=1 - [EXOS6_HUMAN]		2
Q5SSV3	N(G),N(G)-dimethylarginine dimethylaminohydrolase 2 (Fragment) OS=Homo sapiens GN=DDAH2 PE=1 SV=1 - [Q5SSV3_HUMAN]		1
Q5SX87	Rab GDP dissociation inhibitor beta (Fragment) OS=Homo sapiens GN=GDI2 PE=1 SV=1 - [Q5SX87_HUMAN]		18
Q5SYF9	HAUS augmin-like complex subunit 6 (Fragment) OS=Homo sapiens GN=HAUS6 PE=1 SV=1 - [Q5SYF9_HUMAN]		3
Q5SZU1	D-3-phosphoglycerate dehydrogenase OS=Homo sapiens GN=PHGDH PE=1 SV=1 - [Q5SZU1_HUMAN]			2
Q5T191	FAD synthase OS=Homo sapiens GN=FLAD1 PE=1 SV=1 - [Q5T191_HUMAN]		1
Q5T454	MMS19 nucleotide excision repair protein homolog (Fragment) OS=Homo sapiens GN=MMS19 PE=1 SV=2 - [Q5T454_HUMAN]		3
Q5T6H7	Xaa-Pro aminopeptidase 1 OS=Homo sapiens GN=XPNPEP1 PE=1 SV=1 - [Q5T6H7_HUMAN]		1
Q5T6K7	Nuclear transcription factor Y subunit gamma (Fragment) OS=Homo sapiens GN=NFYC PE=1 SV=1 - [Q5T6K7_HUMAN]		1
Q5T712	Monoacylglycerol lipase ABHD12 (Fragment) OS=Homo sapiens GN=ABHD12 PE=1 SV=1 - [Q5T712_HUMAN]		1
Q5T7U0	General transcription factor 3C polypeptide 5 (Fragment) OS=Homo sapiens GN=GTF3C5 PE=1 SV=1 - [Q5T7U0_HUMAN]		5
Q5TA58	Protein argonaute OS=Homo sapiens GN=AGO1 PE=1 SV=1 - [Q5TA58_HUMAN]		1
Q5TBH0	Serine/threonine-protein kinase Nek6 (Fragment) OS=Homo sapiens GN=NEK6 PE=1 SV=6 - [Q5TBH0_HUMAN]		1
Q5VU77	Ubiquitin-associated protein 2-like (Fragment) OS=Homo sapiens GN=UBAP2L PE=1 SV=1 - [Q5VU77_HUMAN]		1
Q5VYM1	Uncharacterized protein C9orf131 OS=Homo sapiens GN=C9orf131 PE=2 SV=3 - [CI131_HUMAN]		1
Q63ZY6	Putative methyltransferase NSUN5C OS=Homo sapiens GN=NSUN5P2 PE=5 SV=2 - [NSN5C_HUMAN]		1
Q6F5E8	Leucine-rich repeat-containing protein 16C OS=Homo sapiens GN=RLTPR PE=1 SV=2 - [LR16C_HUMAN]		2
Q6NVV1	Putative 60S ribosomal protein L13a protein RPL13AP3 OS=Homo sapiens GN=RPL13AP3 PE=5 SV=1 - [R13P3_HUMAN]		1
Q6P1J9	Parafibromin OS=Homo sapiens GN=CDC73 PE=1 SV=1 - [CDC73_HUMAN]		1
Q6P1Q5	ARCN1 protein OS=Homo sapiens GN=ARCN1 PE=1 SV=1 - [Q6P1Q5_HUMAN]		1
Q6P452	Annexin OS=Homo sapiens GN=ANXA4 PE=1 SV=1 - [Q6P452_HUMAN]		1
Q6SJ93	Protein FAM111B OS=Homo sapiens GN=FAM111B PE=1 SV=1 - [F111B_HUMAN]		1
Q6SPF0	Atherin OS=Homo sapiens GN=SAMD1 PE=1 SV=1 - [SAMD1_HUMAN]		2
Q6UN15	Pre-mRNA 3'-end-processing factor FIP1 OS=Homo sapiens GN=FIP1L1 PE=1 SV=1 - [FIP1_HUMAN]		3
Q8IUF1	COBW domain-containing protein 2 OS=Homo sapiens GN=CBWD2 PE=1 SV=1 - [CBWD2_HUMAN]		2
Q8IUL8	Cartilage intermediate layer protein 2 OS=Homo sapiens GN=CILP2 PE=2 SV=2 - [CILP2_HUMAN]		1
Q8IXI1	Mitochondrial Rho GTPase 2 OS=Homo sapiens GN=RHOT2 PE=1 SV=2 - [MIRO2_HUMAN]		1
Q8IZ73	RNA pseudouridylate synthase domain-containing protein 2 OS=Homo sapiens GN=RPUSD2 PE=1 SV=2 - [RUSD2_HUMAN]		1
Q8N573	Oxidation resistance protein 1 OS=Homo sapiens GN=OXR1 PE=1 SV=2 - [OXR1_HUMAN]		1
Q8N9N5	Protein BANP OS=Homo sapiens GN=BANP PE=1 SV=3 - [BANP_HUMAN]		2
Q8NEM2	SHC SH2 domain-binding protein 1 OS=Homo sapiens GN=SHCBP1 PE=1 SV=3 - [SHCBP_HUMAN]		1
Q8NGE7	Olfactory receptor 9K2 OS=Homo sapiens GN=OR9K2 PE=2 SV=2 - [OR9K2_HUMAN]		1
Q8TBE9	N-acylneuraminate-9-phosphatase OS=Homo sapiens GN=NANP PE=1 SV=1 - [NANP_HUMAN]		1
Q8TCU6	Phosphatidylinositol 3,4,5-trisphosphate-dependent Rac exchanger 1 protein OS=Homo sapiens GN=PREX1 PE=1 SV=3 - [PREX1_HUMAN]		2
Q8TD19	Serine/threonine-protein kinase Nek9 OS=Homo sapiens GN=NEK9 PE=1 SV=2 - [NEK9_HUMAN]		2
Q8TEM1	Nuclear pore membrane glycoprotein 210 OS=Homo sapiens GN=NUP210 PE=1 SV=3 - [PO210_HUMAN]		2
Q8WXX5	DnaJ homolog subfamily C member 9 OS=Homo sapiens GN=DNAJC9 PE=1 SV=1 - [DNJC9_HUMAN]		2
Q8WY54	Protein phosphatase 1E OS=Homo sapiens GN=PPM1E PE=1 SV=2 - [PPM1E_HUMAN]		1
Q92785	Zinc finger protein ubi-d4 OS=Homo sapiens GN=DPF2 PE=1 SV=2 - [REQU_HUMAN]		2
Q92805	Golgin subfamily A member 1 OS=Homo sapiens GN=GOLGA1 PE=1 SV=3 - [GOGA1_HUMAN]			1
Q92820	Gamma-glutamyl hydrolase OS=Homo sapiens GN=GGH PE=1 SV=2 - [GGH_HUMAN]		2
Q96AE4	Far upstream element-binding protein 1 OS=Homo sapiens GN=FUBP1 PE=1 SV=3 - [FUBP1_HUMAN]		4
Q96BF3	Transmembrane and immunoglobulin domain-containing protein 2 OS=Homo sapiens GN=TMIGD2 PE=1 SV=2 - [TMIG2_HUMAN]		1
Q96H79	Zinc finger CCCH-type antiviral protein 1-like OS=Homo sapiens GN=ZC3HAV1L PE=1 SV=2 - [ZCCHL_HUMAN]		2
Q96HE7	ERO1-like protein alpha OS=Homo sapiens GN=ERO1A PE=1 SV=2 - [ERO1A_HUMAN]		3
Q96KB5	Lymphokine-activated killer T-cell-originated protein kinase OS=Homo sapiens GN=PBK PE=1 SV=3 - [TOPK_HUMAN]		4
Q96KP4	Cytosolic non-specific dipeptidase OS=Homo sapiens GN=CNDP2 PE=1 SV=2 - [CNDP2_HUMAN]		1
Q96KR1	Zinc finger RNA-binding protein OS=Homo sapiens GN=ZFR PE=1 SV=2 - [ZFR_HUMAN]		1
Q96PZ0	Pseudouridylate synthase 7 homolog OS=Homo sapiens GN=PUS7 PE=1 SV=2 - [PUS7_HUMAN]		2
Q96R06	Sperm-associated antigen 5 OS=Homo sapiens GN=SPAG5 PE=1 SV=2 - [SPAG5_HUMAN]		1
Q96RD7	Pannexin-1 OS=Homo sapiens GN=PANX1 PE=1 SV=4 - [PANX1_HUMAN]		1
Q96S55	ATPase WRNIP1 OS=Homo sapiens GN=WRNIP1 PE=1 SV=2 - [WRIP1_HUMAN]		2
Q96SB4	SRSF protein kinase 1 OS=Homo sapiens GN=SRPK1 PE=1 SV=2 - [SRPK1_HUMAN]		1
Q99436	Proteasome subunit beta type-7 OS=Homo sapiens GN=PSMB7 PE=1 SV=1 - [PSB7_HUMAN]		1
Q99459	Cell division cycle 5-like protein OS=Homo sapiens GN=CDC5L PE=1 SV=2 - [CDC5L_HUMAN]		2
Q99504	Eyes absent homolog 3 OS=Homo sapiens GN=EYA3 PE=1 SV=3 - [EYA3_HUMAN]		3
Q99613	Eukaryotic translation initiation factor 3 subunit C OS=Homo sapiens GN=EIF3C PE=1 SV=1 - [EIF3C_HUMAN]		2
Q99614	Tetratricopeptide repeat protein 1 OS=Homo sapiens GN=TTC1 PE=1 SV=1 - [TTC1_HUMAN]		2
Q99707	Methionine synthase OS=Homo sapiens GN=MTR PE=1 SV=2 - [METH_HUMAN]		1
Q99986	Serine/threonine-protein kinase VRK1 OS=Homo sapiens GN=VRK1 PE=1 SV=1 - [VRK1_HUMAN]		1
Q9BR76	Coronin-1B OS=Homo sapiens GN=CORO1B PE=1 SV=1 - [COR1B_HUMAN]		1
Q9BTT0	Acidic leucine-rich nuclear phosphoprotein 32 family member E OS=Homo sapiens GN=ANP32E PE=1 SV=1 - [AN32E_HUMAN]		5
Q9BTW9	Tubulin-specific chaperone D OS=Homo sapiens GN=TBCD PE=1 SV=2 - [TBCD_HUMAN]		4
Q9BW71	HIRA-interacting protein 3 OS=Homo sapiens GN=HIRIP3 PE=1 SV=3 - [HIRP3_HUMAN]		1
Q9BXP5	Serrate RNA effector molecule homolog OS=Homo sapiens GN=SRRT PE=1 SV=1 - [SRRT_HUMAN]		4
Q9BXW6	Oxysterol-binding protein-related protein 1 OS=Homo sapiens GN=OSBPL1A PE=1 SV=2 - [OSBL1_HUMAN]		1
Q9BYB4	Guanine nucleotide-binding protein subunit beta-like protein 1 OS=Homo sapiens GN=GNB1L PE=1 SV=2 - [GNB1L_HUMAN]		1
Q9C075	Keratin, type I cytoskeletal 23 OS=Homo sapiens GN=KRT23 PE=1 SV=2 - [K1C23_HUMAN]		2
Q9C0B0	RING finger protein unkempt homolog OS=Homo sapiens GN=UNK PE=1 SV=2 - [UNK_HUMAN]		1
Q9C0C9	(E3-independent) E2 ubiquitin-conjugating enzyme OS=Homo sapiens GN=UBE2O PE=1 SV=3 - [UBE2O_HUMAN]		11
Q9GZL7	Ribosome biogenesis protein WDR12 OS=Homo sapiens GN=WDR12 PE=1 SV=2 - [WDR12_HUMAN]		1
Q9H0W7	THAP domain-containing protein 2 OS=Homo sapiens GN=THAP2 PE=1 SV=1 - [THAP2_HUMAN]		1
Q9H1E1	Ribonuclease 7 OS=Homo sapiens GN=RNASE7 PE=1 SV=2 - [RNAS7_HUMAN]		1
Q9H2G4	Testis-specific Y-encoded-like protein 2 OS=Homo sapiens GN=TSPYL2 PE=1 SV=1 - [TSYL2_HUMAN]			1
Q9H2P0	Activity-dependent neuroprotector homeobox protein OS=Homo sapiens GN=ADNP PE=1 SV=1 - [ADNP_HUMAN]		1
Q9H310	Ammonium transporter Rh type B OS=Homo sapiens GN=RHBG PE=1 SV=2 - [RHBG_HUMAN]		1
Q9H3N1	Thioredoxin-related transmembrane protein 1 OS=Homo sapiens GN=TMX1 PE=1 SV=1 - [TMX1_HUMAN]		3
Q9H845	Acyl-CoA dehydrogenase family member 9, mitochondrial OS=Homo sapiens GN=ACAD9 PE=1 SV=1 - [ACAD9_HUMAN]		3
Q9H8Y8	Golgi reassembly-stacking protein 2 OS=Homo sapiens GN=GORASP2 PE=1 SV=3 - [GORS2_HUMAN]		1
Q9HB71	Calcyclin-binding protein OS=Homo sapiens GN=CACYBP PE=1 SV=2 - [CYBP_HUMAN]		1
Q9HCI7	E3 ubiquitin-protein ligase MSL2 OS=Homo sapiens GN=MSL2 PE=1 SV=2 - [MSL2_HUMAN]		1
Q9NPQ8	Synembryn-A OS=Homo sapiens GN=RIC8A PE=1 SV=3 - [RIC8A_HUMAN]		2
Q9NQG5	Regulation of nuclear pre-mRNA domain-containing protein 1B OS=Homo sapiens GN=RPRD1B PE=1 SV=1 - [RPR1B_HUMAN]		3
Q9NRN7	L-aminoadipate-semialdehyde dehydrogenase-phosphopantetheinyl transferase OS=Homo sapiens GN=AASDHPPT PE=1 SV=2 - [ADPPT_HUMAN]		2
Q9NSK0	Kinesin light chain 4 OS=Homo sapiens GN=KLC4 PE=1 SV=3 - [KLC4_HUMAN]		1
Q9NSV4	Protein diaphanous homolog 3 OS=Homo sapiens GN=DIAPH3 PE=1 SV=4 - [DIAP3_HUMAN]			1
Q9NVP1	ATP-dependent RNA helicase DDX18 OS=Homo sapiens GN=DDX18 PE=1 SV=2 - [DDX18_HUMAN]		2
Q9NW36	Lymphoid-specific helicase OS=Homo sapiens GN=HELLS PE=1 SV=1 - [Q9NW36_HUMAN]		1
Q9NWK9	Box C/D snoRNA protein 1 OS=Homo sapiens GN=ZNHIT6 PE=1 SV=1 - [BCD1_HUMAN]		1
Q9NZ08	Endoplasmic reticulum aminopeptidase 1 OS=Homo sapiens GN=ERAP1 PE=1 SV=3 - [ERAP1_HUMAN]		1
Q9NZT1	Calmodulin-like protein 5 OS=Homo sapiens GN=CALML5 PE=1 SV=2 - [CALL5_HUMAN]		2	4
Q9P107	GEM-interacting protein OS=Homo sapiens GN=GMIP PE=1 SV=2 - [GMIP_HUMAN]		1
Q9P215	Pogo transposable element with KRAB domain OS=Homo sapiens GN=POGK PE=1 SV=2 - [POGK_HUMAN]		1
Q9UBF8	Phosphatidylinositol 4-kinase beta OS=Homo sapiens GN=PI4KB PE=1 SV=1 - [PI4KB_HUMAN]		1
Q9UEE9	Craniofacial development protein 1 OS=Homo sapiens GN=CFDP1 PE=1 SV=1 - [CFDP1_HUMAN]		1
Q9UET6	Putative tRNA (cytidine(32)/guanosine(34)-2'-O)-methyltransferase OS=Homo sapiens GN=FTSJ1 PE=1 SV=2 - [TRM7_HUMAN]		1
Q9UIG0	Tyrosine-protein kinase BAZ1B OS=Homo sapiens GN=BAZ1B PE=1 SV=2 - [BAZ1B_HUMAN]		1
Q9UJU6	Drebrin-like protein OS=Homo sapiens GN=DBNL PE=1 SV=1 - [DBNL_HUMAN]		6
Q9UJY4	ADP-ribosylation factor-binding protein GGA2 OS=Homo sapiens GN=GGA2 PE=1 SV=3 - [GGA2_HUMAN]		1
Q9UKN8	General transcription factor 3C polypeptide 4 OS=Homo sapiens GN=GTF3C4 PE=1 SV=2 - [TF3C4_HUMAN]		2
Q9ULX6	A-kinase anchor protein 8-like OS=Homo sapiens GN=AKAP8L PE=1 SV=3 - [AKP8L_HUMAN]		1
Q9UMZ2	Synergin gamma OS=Homo sapiens GN=SYNRG PE=1 SV=2 - [SYNRG_HUMAN]		2
Q9UN86	Ras GTPase-activating protein-binding protein 2 OS=Homo sapiens GN=G3BP2 PE=1 SV=2 - [G3BP2_HUMAN]		1
Q9UNH7	Sorting nexin-6 OS=Homo sapiens GN=SNX6 PE=1 SV=1 - [SNX6_HUMAN]		1
Q9Y224	UPF0568 protein C14orf166 OS=Homo sapiens GN=C14orf166 PE=1 SV=1 - [CN166_HUMAN]		3
Q9Y294	Histone chaperone ASF1A OS=Homo sapiens GN=ASF1A PE=1 SV=1 - [ASF1A_HUMAN]		1
Q9Y2V2	Calcium-regulated heat stable protein 1 OS=Homo sapiens GN=CARHSP1 PE=1 SV=2 - [CHSP1_HUMAN]		1
Q9Y467	Sal-like protein 2 OS=Homo sapiens GN=SALL2 PE=1 SV=4 - [SALL2_HUMAN]		1
Q9Y4P1	Cysteine protease ATG4B OS=Homo sapiens GN=ATG4B PE=1 SV=2 - [ATG4B_HUMAN]		5
Q9Y5L0	Transportin-3 OS=Homo sapiens GN=TNPO3 PE=1 SV=3 - [TNPO3_HUMAN]		8
Q9Y5X2	Sorting nexin-8 OS=Homo sapiens GN=SNX8 PE=1 SV=1 - [SNX8_HUMAN]		1
Q9Y6A5	Transforming acidic coiled-coil-containing protein 3 OS=Homo sapiens GN=TACC3 PE=1 SV=1 - [TACC3_HUMAN]		3
Q9Y6G9	Cytoplasmic dynein 1 light intermediate chain 1 OS=Homo sapiens GN=DYNC1LI1 PE=1 SV=3 - [DC1L1_HUMAN]		7
Q9Y6V7	Probable ATP-dependent RNA helicase DDX49 OS=Homo sapiens GN=DDX49 PE=1 SV=1 - [DDX49_HUMAN]		1
R4GMP9	Lysine-specific histone demethylase 1A (Fragment) OS=Homo sapiens GN=KDM1A PE=1 SV=6 - [R4GMP9_HUMAN]		1
R4GMS4	Rho GTPase-activating protein 19 (Fragment) OS=Homo sapiens GN=ARHGAP19 PE=1 SV=1 - [R4GMS4_HUMAN]		1
S4R338	N-terminal Xaa-Pro-Lys N-methyltransferase 1 OS=Homo sapiens GN=NTMT1 PE=1 SV=1 - [S4R338_HUMAN]		1
S4R3Z0	WD repeat-containing protein 11 (Fragment) OS=Homo sapiens GN=WDR11 PE=1 SV=1 - [S4R3Z0_HUMAN]		1
X6RA14	S-formylglutathione hydrolase OS=Homo sapiens GN=ESD PE=1 SV=1 - [X6RA14_HUMAN]		5
X6RJP6	Transgelin-2 (Fragment) OS=Homo sapiens GN=TAGLN2 PE=1 SV=1 - [X6RJP6_HUMAN]		1
